# Supplementary material for: A 5-km-thick reservoir with &gt;380,000 km3 of magma within the ancient Earth's crust
Source: Research Square preprint supplement (doi:10.21203/rs.3.rs-1104213/v1), 2021-12-09
Supplement: Supplementary file 22 [file 569708fcd67481ba724a3533.xlsx]

## Sheet: alphaMELTS_tbl
SupplTable S4A - Fractional crystallization of O-magma at 2 kbar
System	Thermodynamic	Data:
Pressure	Temperature	mass	F	phi	S	H	V	dVdP*10^6	dVdT*10^6	Cp	logfO2(absolute)	logfO2-QFM	rhol	rhos	viscosity	aH2O	chisqr
2000	1400	99.7975	1	1	287.302	-1.25389e+06	38.9038	-237.533	2408.97	151.913	-6.318	0	2.56524	0	2.178	0.00555953	0
2000	1400	99.7975	1	1	287.302	-1.25389e+06	38.9038	-237.533	2408.97	151.913	-6.318	0	2.56524	0	2.178	0.00555953	0
2000	1399	99.7975	1	1	287.212	-1.25404e+06	38.9014	-237.56	2408.94	151.913	-6.327	0	2.5654	0	2.182	0.00555932	0
2000	1398	99.7975	1	1	287.121	-1.25419e+06	38.899	-237.587	2408.91	151.913	-6.336	0	2.56555	0	2.186	0.00555912	0
2000	1397	99.7975	1	1	287.03	-1.25434e+06	38.8966	-237.614	2408.88	151.913	-6.345	0	2.56571	0	2.19	0.00555891	0
2000	1396	99.7975	1	1	286.939	-1.25449e+06	38.8942	-237.641	2408.85	151.913	-6.353	0	2.56587	0	2.194	0.00555871	0
2000	1395	99.7975	1	1	286.848	-1.25465e+06	38.8918	-237.668	2408.82	151.913	-6.362	0	2.56603	0	2.198	0.0055585	0
2000	1394	99.7975	1	1	286.757	-1.2548e+06	38.8894	-237.695	2408.79	151.912	-6.371	0	2.56619	0	2.202	0.0055583	0
2000	1393	99.7975	1	1	286.666	-1.25495e+06	38.887	-237.722	2408.76	151.912	-6.38	0	2.56635	0	2.206	0.0055581	0
2000	1392	99.7975	1	1	286.575	-1.2551e+06	38.8846	-237.749	2408.73	151.912	-6.388	0	2.56651	0	2.21	0.0055579	0
2000	1391	99.7975	1	1	286.483	-1.25525e+06	38.8822	-237.776	2408.7	151.912	-6.397	0	2.56666	0	2.214	0.0055577	0
2000	1390	99.7975	1	1	286.392	-1.25541e+06	38.8798	-237.803	2408.67	151.912	-6.406	0	2.56682	0	2.218	0.0055575	0
2000	1389	99.7976	1	1	286.301	-1.25556e+06	38.8774	-237.83	2408.64	151.912	-6.415	0	2.56698	0	2.222	0.00555731	0
2000	1388	99.7976	1	1	286.209	-1.25571e+06	38.875	-237.857	2408.61	151.912	-6.424	0	2.56714	0	2.226	0.00555711	0
2000	1387	99.7976	1	1	286.118	-1.25586e+06	38.8726	-237.884	2408.58	151.912	-6.433	0	2.5673	0	2.23	0.00555692	0
2000	1386	99.7976	1	1	286.026	-1.25601e+06	38.8702	-237.911	2408.55	151.912	-6.442	0	2.56746	0	2.234	0.00555672	0
2000	1385	99.7976	1	1	285.935	-1.25617e+06	38.8678	-237.938	2408.52	151.912	-6.45	0	2.56762	0	2.238	0.00555653	0
2000	1384	99.7976	1	1	285.843	-1.25632e+06	38.8654	-237.965	2408.49	151.912	-6.459	0	2.56778	0	2.242	0.00555634	0
2000	1383	99.7976	1	1	285.751	-1.25647e+06	38.863	-237.992	2408.46	151.912	-6.468	0	2.56793	0	2.246	0.00555615	0
2000	1382	99.7976	1	1	285.66	-1.25662e+06	38.8606	-238.019	2408.43	151.912	-6.477	0	2.56809	0	2.25	0.00555597	0
2000	1381	99.7976	1	1	285.568	-1.25677e+06	38.8582	-238.046	2408.4	151.912	-6.486	0	2.56825	0	2.254	0.00555578	0
2000	1380	99.7976	1	1	285.476	-1.25693e+06	38.8558	-238.073	2408.37	151.912	-6.495	0	2.56841	0	2.258	0.00555559	0
2000	1379	99.7976	1	1	285.384	-1.25708e+06	38.8534	-238.1	2408.34	151.912	-6.504	0	2.56857	0	2.262	0.00555541	0
2000	1378	99.7977	1	1	285.292	-1.25723e+06	38.851	-238.127	2408.31	151.912	-6.513	0	2.56873	0	2.266	0.00555523	0
2000	1377	99.7977	1	1	285.2	-1.25738e+06	38.8486	-238.154	2408.28	151.912	-6.522	0	2.56889	0	2.27	0.00555504	0
2000	1376	99.7977	1	1	285.108	-1.25753e+06	38.8462	-238.181	2408.25	151.912	-6.531	0	2.56905	0	2.274	0.00555486	0
2000	1375	99.7977	1	1	285.016	-1.25769e+06	38.8438	-238.209	2408.21	151.912	-6.54	0	2.56921	0	2.278	0.00555468	0
2000	1374	99.7977	1	1	284.924	-1.25784e+06	38.8414	-238.236	2408.18	151.912	-6.549	0	2.56936	0	2.282	0.00555451	0
2000	1373	99.7977	1	1	284.832	-1.25799e+06	38.839	-238.263	2408.15	151.911	-6.558	0	2.56952	0	2.286	0.00555433	0
2000	1372	99.7977	1	1	284.739	-1.25814e+06	38.8366	-238.29	2408.12	151.911	-6.567	0	2.56968	0	2.29	0.00555415	0
2000	1371	99.7977	1	1	284.647	-1.25829e+06	38.8342	-238.317	2408.09	151.911	-6.576	0	2.56984	0	2.295	0.00555398	0
2000	1370	99.7977	1	1	284.555	-1.25845e+06	38.8318	-238.344	2408.06	151.911	-6.585	0	2.57	0	2.299	0.00555381	0
2000	1369	99.7978	1	1	284.462	-1.2586e+06	38.8294	-238.371	2408.02	151.911	-6.594	0	2.57016	0	2.303	0.00555363	0
2000	1368	99.7978	1	1	284.37	-1.25875e+06	38.827	-238.398	2407.99	151.911	-6.603	0	2.57032	0	2.307	0.00555346	0
2000	1367	99.7978	1	1	284.277	-1.2589e+06	38.8246	-238.425	2407.96	151.911	-6.612	0	2.57048	0	2.311	0.0055533	0
2000	1366	99.7978	1	1	284.184	-1.25905e+06	38.8222	-238.452	2407.93	151.911	-6.621	0	2.57064	0	2.315	0.00555313	0
2000	1365	99.7978	1	1	284.092	-1.25921e+06	38.8198	-238.48	2407.89	151.911	-6.63	0	2.5708	0	2.319	0.00555296	0
2000	1364	99.7978	1	1	283.999	-1.25936e+06	38.8174	-238.507	2407.86	151.911	-6.64	0	2.57096	0	2.323	0.0055528	0
2000	1363	99.7978	1	1	283.906	-1.25951e+06	38.815	-238.534	2407.83	151.911	-6.649	0	2.57111	0	2.327	0.00555263	0
2000	1362	99.7978	1	1	283.813	-1.25966e+06	38.8126	-238.561	2407.8	151.911	-6.658	0	2.57127	0	2.332	0.00555247	0
2000	1361	99.7978	1	1	283.72	-1.25981e+06	38.8102	-238.588	2407.76	151.911	-6.667	0	2.57143	0	2.336	0.00555231	0
2000	1360	99.7979	1	1	283.628	-1.25997e+06	38.8078	-238.615	2407.73	151.911	-6.676	0	2.57159	0	2.34	0.00555215	0
2000	1359	99.7979	1	1	283.535	-1.26012e+06	38.8054	-238.642	2407.7	151.911	-6.685	0	2.57175	0	2.344	0.00555199	0
2000	1358	99.7979	1	1	283.441	-1.26027e+06	38.803	-238.67	2407.66	151.911	-6.694	0	2.57191	0	2.348	0.00555183	0
2000	1357	99.7979	1	1	283.348	-1.26042e+06	38.8006	-238.697	2407.63	151.911	-6.704	0	2.57207	0	2.352	0.00555168	0
2000	1356	99.7979	1	1	283.255	-1.26058e+06	38.7982	-238.724	2407.6	151.911	-6.713	0	2.57223	0	2.357	0.00555153	0
2000	1355	99.7979	1	1	283.162	-1.26073e+06	38.7958	-238.751	2407.56	151.911	-6.722	0	2.57239	0	2.361	0.00555137	0
2000	1354	99.7979	1	1	283.069	-1.26088e+06	38.7934	-238.778	2407.53	151.911	-6.731	0	2.57255	0	2.365	0.00555122	0
2000	1353	99.7979	1	1	282.975	-1.26103e+06	38.791	-238.806	2407.5	151.911	-6.741	0	2.57271	0	2.369	0.00555107	0
2000	1352	99.7979	1	1	282.882	-1.26118e+06	38.7886	-238.833	2407.46	151.911	-6.75	0	2.57287	0	2.373	0.00555092	0
2000	1351	99.798	1	1	282.788	-1.26134e+06	38.7862	-238.86	2407.43	151.911	-6.759	0	2.57302	0	2.377	0.00555078	0
2000	1350	99.798	1	1	282.695	-1.26149e+06	38.7838	-238.887	2407.39	151.911	-6.768	0	2.57318	0	2.382	0.00555063	0
2000	1349	99.798	1	1	282.601	-1.26164e+06	38.7814	-238.914	2407.36	151.911	-6.778	0	2.57334	0	2.386	0.00555049	0
2000	1348	99.798	1	1	282.508	-1.26179e+06	38.779	-238.942	2407.33	151.911	-6.787	0	2.5735	0	2.39	0.00555034	0
2000	1347	99.798	1	1	282.414	-1.26194e+06	38.7767	-238.969	2407.29	151.911	-6.796	0	2.57366	0	2.394	0.0055502	0
2000	1346	99.798	1	1	282.32	-1.2621e+06	38.7743	-238.996	2407.26	151.911	-6.806	0	2.57382	0	2.399	0.00555006	0
2000	1345	99.798	1	1	282.226	-1.26225e+06	38.7719	-239.023	2407.22	151.91	-6.815	0	2.57398	0	2.403	0.00554992	0
2000	1344	99.798	1	1	282.132	-1.2624e+06	38.7695	-239.051	2407.19	151.91	-6.824	0	2.57414	0	2.407	0.00554979	0
2000	1343	99.7981	1	1	282.038	-1.26255e+06	38.7671	-239.078	2407.15	151.91	-6.834	0	2.5743	0	2.411	0.00554965	0
2000	1342	99.7981	1	1	281.944	-1.2627e+06	38.7647	-239.105	2407.12	151.91	-6.843	0	2.57446	0	2.415	0.00554952	0
2000	1341	99.7981	1	1	281.85	-1.26286e+06	38.7623	-239.132	2407.08	151.91	-6.852	0	2.57462	0	2.42	0.00554939	0
2000	1340	99.7981	1	1	281.756	-1.26301e+06	38.7599	-239.16	2407.05	151.91	-6.862	0	2.57478	0	2.424	0.00554925	0
2000	1339	99.7981	1	1	281.662	-1.26316e+06	38.7575	-239.187	2407.01	151.91	-6.871	0	2.57494	0	2.428	0.00554913	0
2000	1338	99.7981	1	1	281.568	-1.26331e+06	38.7551	-239.214	2406.98	151.91	-6.88	0	2.5751	0	2.432	0.005549	0
2000	1337	99.7981	1	1	281.474	-1.26346e+06	38.7527	-239.241	2406.94	151.91	-6.89	0	2.57526	0	2.437	0.00554887	0
2000	1336	99.7982	1	1	281.379	-1.26362e+06	38.7503	-239.269	2406.91	151.91	-6.899	0	2.57542	0	2.441	0.00554875	0
2000	1335	99.7982	1	1	281.285	-1.26377e+06	38.7479	-239.296	2406.87	151.91	-6.909	0	2.57558	0	2.445	0.00554862	0
2000	1334	99.7982	1	1	281.19	-1.26392e+06	38.7455	-239.323	2406.83	151.91	-6.918	0	2.57573	0	2.45	0.0055485	0
2000	1333	99.7982	1	1	281.096	-1.26407e+06	38.7431	-239.351	2406.8	151.91	-6.928	0	2.5759	0	2.454	0.00554838	0
2000	1332	99.7982	1	1	281.001	-1.26423e+06	38.7407	-239.378	2406.76	151.91	-6.937	0	2.57605	0	2.458	0.00554826	0
2000	1331	99.7982	1	1	280.907	-1.26438e+06	38.7383	-239.405	2406.73	151.91	-6.947	0	2.57621	0	2.462	0.00554815	0
2000	1330	99.7982	1	1	280.812	-1.26453e+06	38.7359	-239.433	2406.69	151.91	-6.956	0	2.57637	0	2.467	0.00554803	0
2000	1329	99.7983	1	1	280.717	-1.26468e+06	38.7335	-239.46	2406.65	151.91	-6.966	0	2.57653	0	2.471	0.00554792	0
2000	1328	99.7983	1	1	280.622	-1.26483e+06	38.7311	-239.487	2406.62	151.91	-6.975	0	2.57669	0	2.475	0.0055478	0
2000	1327	99.7983	1	1	280.528	-1.26499e+06	38.7288	-239.515	2406.58	151.91	-6.985	0	2.57685	0	2.48	0.00554769	0
2000	1326	99.7983	1	1	280.433	-1.26514e+06	38.7264	-239.542	2406.54	151.91	-6.994	0	2.57701	0	2.484	0.00554758	0
2000	1325	99.7983	1	1	280.338	-1.26529e+06	38.724	-239.569	2406.51	151.91	-7.004	0	2.57717	0	2.488	0.00554748	0
2000	1324	99.7983	1	1	280.243	-1.26544e+06	38.7216	-239.597	2406.47	151.91	-7.013	0	2.57733	0	2.493	0.00554737	0
2000	1323	99.7983	1	1	280.147	-1.26559e+06	38.7192	-239.624	2406.43	151.91	-7.023	0	2.57749	0	2.497	0.00554727	0
2000	1322	99.7984	1	1	280.052	-1.26575e+06	38.7168	-239.652	2406.4	151.91	-7.033	0	2.57765	0	2.501	0.00554716	0
2000	1321	99.7984	1	1	279.957	-1.2659e+06	38.7144	-239.679	2406.36	151.91	-7.042	0	2.57781	0	2.506	0.00554706	0
2000	1320	99.7984	1	1	279.862	-1.26605e+06	38.712	-239.706	2406.32	151.91	-7.052	0	2.57797	0	2.51	0.00554696	0
2000	1319	99.7984	1	1	279.766	-1.2662e+06	38.7096	-239.734	2406.29	151.91	-7.062	0	2.57813	0	2.515	0.00554687	0
2000	1318	99.7984	1	1	279.671	-1.26636e+06	38.7072	-239.761	2406.25	151.91	-7.071	0	2.57829	0	2.519	0.00554677	0
2000	1317	99.7984	1	1	279.576	-1.26651e+06	38.7048	-239.789	2406.21	151.91	-7.081	0	2.57845	0	2.523	0.00554668	0
2000	1316	99.7985	1	1	279.48	-1.26666e+06	38.7024	-239.816	2406.17	151.91	-7.09	0	2.57861	0	2.528	0.00554659	0
2000	1315	99.7985	1	1	279.384	-1.26681e+06	38.7	-239.843	2406.13	151.91	-7.1	0	2.57877	0	2.532	0.00554649	0
2000	1314	99.7985	1	1	279.289	-1.26696e+06	38.6977	-239.871	2406.1	151.91	-7.11	0	2.57893	0	2.536	0.00554641	0
2000	1313	99.7985	1	1	279.193	-1.26712e+06	38.6953	-239.898	2406.06	151.91	-7.12	0	2.57909	0	2.541	0.00554632	0
2000	1312	99.7985	1	1	279.097	-1.26727e+06	38.6929	-239.926	2406.02	151.91	-7.129	0	2.57925	0	2.545	0.00554623	0
2000	1311	99.7985	1	1	279.001	-1.26742e+06	38.6905	-239.953	2405.98	151.91	-7.139	0	2.57941	0	2.55	0.00554615	0
2000	1310	99.7986	1	1	278.906	-1.26757e+06	38.6881	-239.981	2405.94	151.91	-7.149	0	2.57957	0	2.554	0.00554607	0
2000	1309	99.7986	1	1	278.81	-1.26772e+06	38.6857	-240.008	2405.91	151.91	-7.159	0	2.57973	0	2.558	0.00554599	0
2000	1308	99.7986	1	1	278.714	-1.26788e+06	38.6833	-240.036	2405.87	151.91	-7.168	0	2.57989	0	2.563	0.00554591	0
2000	1307	99.7986	1	1	278.618	-1.26803e+06	38.6809	-240.063	2405.83	151.91	-7.178	0	2.58005	0	2.567	0.00554583	0
2000	1306	99.7986	1	1	278.521	-1.26818e+06	38.6785	-240.091	2405.79	151.91	-7.188	0	2.58021	0	2.572	0.00554576	0
2000	1305	99.7986	1	1	278.425	-1.26833e+06	38.6761	-240.118	2405.75	151.91	-7.198	0	2.58037	0	2.576	0.00554568	0
2000	1304	99.7987	1	1	278.329	-1.26849e+06	38.6737	-240.146	2405.71	151.91	-7.208	0	2.58053	0	2.581	0.00554561	0
2000	1303	99.7987	1	1	278.233	-1.26864e+06	38.6713	-240.173	2405.67	151.91	-7.217	0	2.58069	0	2.585	0.00554554	0
2000	1302	99.7987	1	1	278.136	-1.26879e+06	38.669	-240.201	2405.63	151.91	-7.227	0	2.58085	0	2.59	0.00554547	0
2000	1301	99.7987	1	1	278.04	-1.26894e+06	38.6666	-240.228	2405.6	151.91	-7.237	0	2.58101	0	2.594	0.00554541	0
2000	1300	99.7987	1	1	277.943	-1.26909e+06	38.6642	-240.256	2405.56	151.91	-7.247	0	2.58117	0	2.599	0.00554534	0
2000	1299	99.7987	1	1	277.847	-1.26925e+06	38.6618	-240.283	2405.52	151.91	-7.257	0	2.58133	0	2.603	0.00554528	0
2000	1298	99.7988	1	1	277.75	-1.2694e+06	38.6594	-240.311	2405.48	151.91	-7.267	0	2.58149	0	2.607	0.00554522	0
2000	1297	99.7988	1	1	277.654	-1.26955e+06	38.657	-240.338	2405.44	151.91	-7.277	0	2.58165	0	2.612	0.00554516	0
2000	1296	99.7988	1	1	277.557	-1.2697e+06	38.6546	-240.366	2405.4	151.91	-7.287	0	2.58181	0	2.616	0.00554511	0
2000	1295	99.7988	1	1	277.46	-1.26985e+06	38.6522	-240.393	2405.36	151.91	-7.296	0	2.58197	0	2.621	0.00554505	0
2000	1294	99.7988	1	1	277.363	-1.27001e+06	38.6498	-240.421	2405.32	151.91	-7.306	0	2.58213	0	2.625	0.005545	0
2000	1293	99.7988	1	1	277.266	-1.27016e+06	38.6474	-240.448	2405.28	151.91	-7.316	0	2.58229	0	2.63	0.00554495	0
2000	1292	99.7989	1	1	277.169	-1.27031e+06	38.6451	-240.476	2405.24	151.91	-7.326	0	2.58245	0	2.634	0.0055449	0
2000	1291	99.7989	1	1	277.072	-1.27046e+06	38.6427	-240.504	2405.2	151.91	-7.336	0	2.58261	0	2.639	0.00554485	0
2000	1290	99.7989	1	1	276.975	-1.27062e+06	38.6403	-240.531	2405.16	151.91	-7.346	0	2.58277	0	2.644	0.0055448	0
2000	1289	99.7989	1	1	276.878	-1.27077e+06	38.6379	-240.559	2405.12	151.91	-7.356	0	2.58293	0	2.648	0.00554476	0
2000	1288	99.7989	1	1	276.781	-1.27092e+06	38.6355	-240.586	2405.08	151.91	-7.366	0	2.58309	0	2.653	0.00554472	0
2000	1287	99.799	1	1	276.683	-1.27107e+06	38.6331	-240.614	2405.03	151.91	-7.376	0	2.58325	0	2.657	0.00554468	0
2000	1286	99.799	1	1	276.586	-1.27122e+06	38.6307	-240.642	2404.99	151.91	-7.386	0	2.58341	0	2.662	0.00554464	0
2000	1285	99.799	1	1	276.489	-1.27138e+06	38.6283	-240.669	2404.95	151.91	-7.396	0	2.58357	0	2.666	0.00554461	0
2000	1284	99.799	1	1	276.391	-1.27153e+06	38.626	-240.697	2404.91	151.91	-7.407	0	2.58373	0	2.671	0.00554457	0
2000	1283	99.799	1	1	276.294	-1.27168e+06	38.6236	-240.725	2404.87	151.91	-7.417	0	2.58389	0	2.675	0.00554454	0
2000	1282	99.7991	1	1	276.196	-1.27183e+06	38.6212	-240.752	2404.83	151.91	-7.427	0	2.58405	0	2.68	0.00554451	0
2000	1281	99.7991	1	1	276.098	-1.27198e+06	38.6188	-240.78	2404.79	151.91	-7.437	0	2.58421	0	2.685	0.00554449	0
2000	1280	99.7991	1	1	276.001	-1.27214e+06	38.6164	-240.808	2404.75	151.91	-7.447	0	2.58437	0	2.689	0.00554446	0
2000	1279	99.7991	1	1	275.903	-1.27229e+06	38.614	-240.835	2404.71	151.91	-7.457	0	2.58453	0	2.694	0.00554444	0
2000	1278	99.7991	1	1	275.805	-1.27244e+06	38.6116	-240.863	2404.66	151.91	-7.467	0	2.58469	0	2.698	0.00554441	0
2000	1277	99.7992	1	1	275.707	-1.27259e+06	38.6092	-240.891	2404.62	151.91	-7.477	0	2.58485	0	2.703	0.00554439	0
2000	1276	99.7992	1	1	275.609	-1.27275e+06	38.6069	-240.918	2404.58	151.91	-7.488	0	2.58501	0	2.708	0.00554438	0
2000	1275	99.7992	1	1	275.511	-1.2729e+06	38.6045	-240.946	2404.54	151.91	-7.498	0	2.58517	0	2.712	0.00554436	0
2000	1274	99.7992	1	1	275.413	-1.27305e+06	38.6021	-240.974	2404.5	151.91	-7.508	0	2.58533	0	2.717	0.00554435	0
2000	1273	99.7992	1	1	275.315	-1.2732e+06	38.5997	-241.001	2404.45	151.91	-7.518	0	2.58549	0	2.721	0.00554434	0
2000	1272	99.7993	1	1	275.216	-1.27335e+06	38.5973	-241.029	2404.41	151.91	-7.528	0	2.58565	0	2.726	0.00554433	0
2000	1271	99.7993	1	1	275.118	-1.27351e+06	38.5949	-241.057	2404.37	151.91	-7.539	0	2.58581	0	2.731	0.00554432	0
2000	1270	99.7993	1	1	275.02	-1.27366e+06	38.5925	-241.085	2404.33	151.91	-7.549	0	2.58597	0	2.735	0.00554432	0
2000	1269	99.7993	1	1	274.921	-1.27381e+06	38.5901	-241.112	2404.29	151.91	-7.559	0	2.58614	0	2.74	0.00554431	0
2000	1268	99.7993	1	1	274.823	-1.27396e+06	38.5878	-241.14	2404.24	151.91	-7.57	0	2.58629	0	2.745	0.00554431	0
2000	1267	99.7994	1	1	274.724	-1.27412e+06	38.5854	-241.168	2404.2	151.91	-7.58	0	2.58646	0	2.749	0.00554432	0
2000	1266	99.7994	1	1	274.626	-1.27427e+06	38.583	-241.196	2404.16	151.91	-7.59	0	2.58662	0	2.754	0.00554432	0
2000	1265	99.7994	1	1	274.527	-1.27442e+06	38.5806	-241.223	2404.11	151.91	-7.6	0	2.58678	0	2.759	0.00554432	0
2000	1264	99.7994	1	1	274.428	-1.27457e+06	38.5782	-241.251	2404.07	151.91	-7.611	0	2.58694	0	2.763	0.00554433	0
2000	1263	99.7994	1	1	274.329	-1.27472e+06	38.5758	-241.279	2404.03	151.91	-7.621	0	2.5871	0	2.768	0.00554434	0
2000	1262	99.7995	1	1	274.23	-1.27488e+06	38.5734	-241.307	2403.98	151.91	-7.632	0	2.58726	0	2.773	0.00554436	0
2000	1261	99.7995	1	1	274.132	-1.27503e+06	38.5711	-241.335	2403.94	151.91	-7.642	0	2.58742	0	2.777	0.00554437	0
2000	1260	99.7995	1	1	274.033	-1.27518e+06	38.5687	-241.362	2403.9	151.91	-7.652	0	2.58758	0	2.782	0.00554439	0
2000	1259	99.7995	1	1	273.933	-1.27533e+06	38.5663	-241.39	2403.85	151.91	-7.663	0	2.58774	0	2.787	0.00554441	0
2000	1258	99.7996	1	1	273.834	-1.27549e+06	38.5639	-241.418	2403.81	151.91	-7.673	0	2.5879	0	2.792	0.00554443	0
2000	1257	99.7996	1	1	273.735	-1.27564e+06	38.5615	-241.446	2403.77	151.91	-7.684	0	2.58806	0	2.796	0.00554445	0
2000	1256	99.7996	1	1	273.636	-1.27579e+06	38.5591	-241.474	2403.72	151.91	-7.694	0	2.58822	0	2.801	0.00554448	0
2000	1255	99.7996	1	1	273.537	-1.27594e+06	38.5568	-241.502	2403.68	151.91	-7.704	0	2.58838	0	2.806	0.00554451	0
2000	1254	99.7996	1	1	273.437	-1.27609e+06	38.5544	-241.529	2403.64	151.91	-7.715	0	2.58854	0	2.811	0.00554454	0
2000	1253	99.7997	1	1	273.338	-1.27625e+06	38.552	-241.557	2403.59	151.91	-7.725	0	2.5887	0	2.815	0.00554457	0
2000	1252	99.7997	1	1	273.238	-1.2764e+06	38.5496	-241.585	2403.55	151.91	-7.736	0	2.58886	0	2.82	0.0055446	0
2000	1251	99.7997	1	1	273.139	-1.27655e+06	38.5472	-241.613	2403.5	151.91	-7.746	0	2.58902	0	2.825	0.00554464	0
2000	1250	99.7997	1	1	273.039	-1.2767e+06	38.5448	-241.641	2403.46	151.91	-7.757	0	2.58919	0	2.83	0.00554468	0
2000	1249	99.7998	1	1	272.939	-1.27686e+06	38.5425	-241.669	2403.41	151.91	-7.767	0	2.58935	0	2.834	0.00554472	0
2000	1248	99.7998	1	1	272.839	-1.27701e+06	38.5401	-241.697	2403.37	151.91	-7.778	0	2.58951	0	2.839	0.00554477	0
2000	1247	99.7998	1	1	272.74	-1.27716e+06	38.5377	-241.725	2403.33	151.91	-7.789	0	2.58967	0	2.844	0.00554481	0
2000	1246	99.7998	1	1	272.64	-1.27731e+06	38.5353	-241.752	2403.28	151.91	-7.799	0	2.58983	0	2.849	0.00554486	0
2000	1245	99.7999	1	1	272.54	-1.27746e+06	38.5329	-241.78	2403.24	151.911	-7.81	0	2.58999	0	2.854	0.00554491	0
2000	1244	99.7999	1	1	272.44	-1.27762e+06	38.5305	-241.808	2403.19	151.911	-7.82	0	2.59015	0	2.858	0.00554497	0
2000	1243	99.7999	1	1	272.339	-1.27777e+06	38.5282	-241.836	2403.15	151.911	-7.831	0	2.59031	0	2.863	0.00554503	0
2000	1242	99.7999	1	1	272.239	-1.27792e+06	38.5258	-241.864	2403.1	151.911	-7.842	0	2.59047	0	2.868	0.00554508	0
2000	1241	99.8	1	1	272.139	-1.27807e+06	38.5234	-241.892	2403.05	151.911	-7.852	0	2.59063	0	2.873	0.00554515	0
2000	1240	99.8	1	1	272.039	-1.27823e+06	38.521	-241.92	2403.01	151.911	-7.863	0	2.59079	0	2.878	0.00554521	0
2000	1239	99.8	1	1	271.938	-1.27838e+06	38.5186	-241.948	2402.96	151.911	-7.874	0	2.59095	0	2.882	0.00554528	0
2000	1238	99.8	1	1	271.838	-1.27853e+06	38.5162	-241.976	2402.92	151.911	-7.884	0	2.59111	0	2.887	0.00554534	0
2000	1237	99.8001	1	1	271.737	-1.27868e+06	38.5139	-242.004	2402.87	151.911	-7.895	0	2.59128	0	2.892	0.00554541	0
2000	1236	99.8001	1	1	271.637	-1.27884e+06	38.5115	-242.032	2402.83	151.911	-7.906	0	2.59144	0	2.897	0.00554549	0
2000	1235	99.8001	1	1	271.536	-1.27899e+06	38.5091	-242.06	2402.78	151.911	-7.917	0	2.5916	0	2.902	0.00554556	0
2000	1234	99.8001	1	1	271.435	-1.27914e+06	38.5067	-242.088	2402.74	151.911	-7.927	0	2.59176	0	2.907	0.00554564	0
2000	1233	99.8002	1	1	271.335	-1.27929e+06	38.5043	-242.116	2402.69	151.911	-7.938	0	2.59192	0	2.912	0.00554572	0
2000	1232	99.8	0.997464	0.997934	271.171	-1.27954e+06	38.4894	-241.81	2399.49	151.814	-7.949	0	2.5917	3.18347	2.922	0.00556257	0
2000	1231	99.5479	0.998515	0.998791	270.41	-1.27646e+06	38.4006	-241.583	2394.25	151.433	-7.96	0	2.59164	3.18391	2.93	0.0055724	0
2000	1230	99.401	0.998519	0.998795	269.91	-1.27476e+06	38.3449	-241.382	2390.43	151.188	-7.97	0	2.59158	3.18434	2.938	0.00558221	0
2000	1229	99.2545	0.984666	0.985999	269.096	-1.27353e+06	38.2554	-238.909	2369.27	150.523	-7.981	0	2.59102	2.84151	2.95	0.00574427	0
2000	1228	97.7341	0.978668	0.980451	264.759	-1.25396e+06	37.6633	-234.907	2327.12	147.968	-7.992	0	2.59023	2.83172	2.963	0.0059807	0
2000	1227	95.6508	0.979199	0.980945	259.058	-1.22677e+06	36.873	-230.812	2280.49	144.74	-8.003	0	2.58944	2.83173	2.977	0.00622029	0
2000	1226	93.6627	0.979705	0.981415	253.617	-1.20082e+06	36.1188	-226.898	2235.97	141.659	-8.014	0	2.58867	2.83175	2.99	0.00646297	0
2000	1225	91.7634	0.980189	0.981864	248.418	-1.17604e+06	35.3982	-223.153	2193.42	138.716	-8.025	0	2.5879	2.83177	3.004	0.00670866	0
2000	1224	89.9471	0.98065	0.982293	243.444	-1.15235e+06	34.709	-219.567	2152.7	135.902	-8.036	0	2.58713	2.83181	3.017	0.00695732	0
2000	1223	88.2083	0.981092	0.982702	238.682	-1.12968e+06	34.049	-216.128	2113.71	133.208	-8.047	0	2.58638	2.83185	3.03	0.00720888	0
2000	1222	86.542	0.981514	0.983095	234.117	-1.10796e+06	33.4166	-212.828	2076.33	130.626	-8.057	0	2.58563	2.8319	3.043	0.00746327	0
2000	1221	84.9438	0.981919	0.98347	229.739	-1.08714e+06	32.8099	-209.658	2040.47	128.15	-8.068	0	2.58488	2.83197	3.056	0.00772046	0
2000	1220	83.4096	0.982306	0.98383	225.534	-1.06715e+06	32.2274	-206.611	2006.02	125.774	-8.079	0	2.58414	2.83204	3.069	0.00798037	0
2000	1219	81.9354	0.982678	0.984175	221.493	-1.04795e+06	31.6677	-203.68	1972.92	123.49	-8.09	0	2.58341	2.83212	3.082	0.00824296	0
2000	1218	80.5178	0.983035	0.984507	217.607	-1.0295e+06	31.1294	-200.858	1941.07	121.295	-8.101	0	2.58268	2.83221	3.094	0.00850817	0
2000	1217	79.1535	0.983378	0.984825	213.866	-1.01174e+06	30.6113	-198.138	1910.41	119.182	-8.112	0	2.58196	2.8323	3.107	0.00877596	0
2000	1216	77.8395	0.983708	0.985131	210.263	-994646	30.1123	-195.515	1880.87	117.147	-8.123	0	2.58124	2.83241	3.12	0.00904627	0
2000	1215	76.573	0.984025	0.985426	206.789	-978173	29.6312	-192.984	1852.39	115.187	-8.134	0	2.58053	2.83252	3.132	0.00931906	0
2000	1214	75.3515	0.984331	0.985709	203.437	-962289	29.1672	-190.54	1824.91	113.295	-8.145	0	2.57982	2.83264	3.144	0.00959428	0
2000	1213	74.1725	0.984625	0.985983	200.202	-946963	28.7193	-188.178	1798.38	111.47	-8.156	0	2.57912	2.83277	3.157	0.0098719	0
2000	1212	73.0338	0.984909	0.986246	197.077	-932166	28.2866	-185.895	1772.75	109.708	-8.168	0	2.57842	2.83291	3.169	0.0101519	0
2000	1211	71.9333	0.985182	0.9865	194.056	-917869	27.8685	-183.686	1747.98	108.005	-8.179	0	2.57772	2.83306	3.181	0.0104341	0
2000	1210	70.8692	0.985446	0.986745	191.135	-904048	27.4641	-181.547	1724.01	106.358	-8.19	0	2.57703	2.83321	3.194	0.0107186	0
2000	1209	69.8394	0.97916	0.981654	188.172	-890878	27.0501	-178.978	1695.92	104.59	-8.201	0	2.5753	2.93289	3.216	0.0111132	0
2000	1208	68.3866	0.982225	0.984191	184.289	-872167	26.5152	-176.582	1664.65	102.417	-8.212	0	2.574	2.89981	3.234	0.0114676	0
2000	1207	67.1737	0.982611	0.98454	180.987	-856556	26.0589	-174.327	1637.08	100.545	-8.223	0	2.57271	2.89943	3.252	0.0118247	0
2000	1206	66.0084	0.982981	0.984875	177.817	-841557	25.6205	-172.157	1610.58	95.5979	-8.234	0	2.57144	2.89905	3.27	0.0121846	0
2000	1205	64.8877	0.983335	0.985196	174.767	-827137	25.1987	-170.066	1585.09	93.9045	-8.245	0	2.57017	2.89867	3.288	0.0125471	0
2000	1204	63.809	0.983676	0.985504	171.831	-813261	24.7928	-168.05	1560.56	92.275	-8.257	0	2.56892	2.8983	3.306	0.0129123	0
2000	1203	62.7701	0.984003	0.9858	169.003	-799901	24.4017	-166.104	1536.92	90.7058	-8.268	0	2.56768	2.89792	3.324	0.01328	0
2000	1202	61.7687	0.984318	0.986085	166.276	-787025	24.0246	-164.226	1514.13	89.1936	-8.279	0	2.56645	2.89754	3.341	0.0136502	0
2000	1201	60.8028	0.984621	0.986359	163.645	-774610	23.6609	-162.412	1492.14	87.7353	-8.29	0	2.56523	2.89716	3.359	0.0140228	0
2000	1200	59.8704	0.984914	0.986624	161.105	-762629	23.3097	-160.657	1470.91	86.328	-8.302	0	2.56403	2.89679	3.376	0.0143979	0
2000	1199	58.97	0.985196	0.986878	158.651	-751061	22.9705	-158.96	1450.41	84.9691	-8.313	0	2.56283	2.89641	3.393	0.0147753	0
2000	1198	58.0997	0.985468	0.987124	156.279	-739884	22.6426	-157.317	1430.59	83.6561	-8.324	0	2.56164	2.89603	3.41	0.015155	0
2000	1197	57.2581	0.985412	0.987096	153.983	-729081	22.325	-155.698	1411.16	82.3818	-8.335	0	2.56038	2.89948	3.428	0.0155449	0
2000	1196	56.4255	0.985486	0.987157	151.713	-718428	22.0116	-154.103	1392.04	81.1259	-8.347	0	2.55911	2.89712	3.446	0.0159427	0
2000	1195	55.6093	0.985751	0.987397	149.489	-707982	21.7044	-152.552	1373.45	79.8973	-8.358	0	2.55785	2.89672	3.463	0.0163427	0
2000	1194	54.8196	0.986007	0.987628	147.338	-697879	21.4072	-151.05	1355.46	78.7091	-8.369	0	2.5566	2.89631	3.481	0.0167449	0
2000	1193	54.0553	0.986254	0.987851	145.255	-688101	21.1194	-149.594	1338.05	77.5591	-8.381	0	2.55537	2.8959	3.498	0.0171492	0
2000	1192	53.315	0.986494	0.988067	143.237	-678634	20.8407	-148.181	1321.18	76.4457	-8.392	0	2.55414	2.89549	3.515	0.0175557	0
2000	1191	52.5976	0.986725	0.988275	141.281	-669462	20.5706	-146.81	1304.84	75.3669	-8.404	0	2.55293	2.89508	3.532	0.0179641	0
2000	1190	51.9022	0.986949	0.988477	139.385	-660572	20.3086	-145.479	1288.98	74.3213	-8.415	0	2.55172	2.89468	3.549	0.0183746	0
2000	1189	51.2275	0.987166	0.988673	137.544	-651950	20.0544	-144.186	1273.61	73.3073	-8.426	0	2.55053	2.89427	3.566	0.018787	0
2000	1188	50.5728	0.987376	0.988862	135.758	-643584	19.8078	-142.929	1258.68	72.3235	-8.438	0	2.54935	2.89386	3.583	0.0192013	0
2000	1187	49.9372	0.987579	0.989045	134.024	-635464	19.5682	-141.706	1244.19	71.3684	-8.449	0	2.54817	2.89345	3.6	0.0196175	0
2000	1186	49.3197	0.987777	0.989223	132.338	-627577	19.3355	-140.517	1230.11	70.4409	-8.461	0	2.54701	2.89304	3.617	0.0200356	0
2000	1185	48.7197	0.987968	0.989395	130.7	-619915	19.1092	-139.36	1216.43	69.5398	-8.472	0	2.54586	2.89264	3.633	0.0204555	0
2000	1184	48.1363	0.988154	0.989563	129.107	-612467	18.8893	-138.233	1203.12	68.6639	-8.484	0	2.54471	2.89223	3.65	0.0208771	0
2000	1183	47.5689	0.988335	0.989725	127.557	-605224	18.6753	-137.135	1190.18	67.8122	-8.495	0	2.54358	2.89182	3.666	0.0213005	0
2000	1182	47.0167	0.98851	0.989882	126.049	-598178	18.467	-136.065	1177.59	66.9836	-8.507	0	2.54245	2.89141	3.683	0.0217256	0
2000	1181	46.4793	0.98868	0.990035	124.58	-591321	18.2643	-135.022	1165.33	66.1773	-8.518	0	2.54134	2.89101	3.699	0.0221523	0
2000	1180	45.956	0.988845	0.990184	123.15	-584645	18.0668	-134.005	1153.39	65.3923	-8.53	0	2.54023	2.8906	3.715	0.0225808	0
2000	1179	45.4462	0.989006	0.990329	121.756	-578143	17.8744	-133.013	1141.75	64.6278	-8.542	0	2.53913	2.89019	3.732	0.0230108	0
2000	1178	44.9493	0.989163	0.990469	120.398	-571808	17.6869	-132.045	1130.42	63.8829	-8.553	0	2.53804	2.88979	3.748	0.0234425	0
2000	1177	44.465	0.989315	0.990606	119.073	-565634	17.504	-131.1	1119.36	63.157	-8.565	0	2.53696	2.88939	3.764	0.0238757	0
2000	1176	43.9927	0.989463	0.990739	117.781	-559614	17.3257	-130.176	1108.59	62.4492	-8.576	0	2.53589	2.88898	3.78	0.0243104	0
2000	1175	43.532	0.989607	0.990868	116.521	-553742	17.1517	-129.275	1098.07	61.7589	-8.588	0	2.53483	2.88858	3.796	0.0247467	0
2000	1174	43.0824	0.989747	0.990994	115.29	-548014	16.9819	-128.393	1087.81	61.0854	-8.6	0	2.53377	2.88818	3.811	0.0251844	0
2000	1173	42.6435	0.989884	0.991117	114.089	-542423	16.8161	-127.532	1077.79	60.4282	-8.611	0	2.53272	2.88777	3.827	0.0256237	0
2000	1172	42.215	0.990017	0.991236	112.915	-536965	16.6542	-126.689	1068.01	59.7866	-8.623	0	2.53168	2.88738	3.843	0.0260643	0
2000	1171	41.7964	0.990147	0.991353	111.769	-531635	16.496	-125.865	1058.45	59.1601	-8.635	0	2.53065	2.88698	3.859	0.0265064	0
2000	1170	41.3874	0.990274	0.991466	110.649	-526428	16.3414	-125.059	1049.11	58.5481	-8.646	0	2.52963	2.88658	3.874	0.0269499	0
2000	1169	40.9877	0.990397	0.991577	109.554	-521340	16.1903	-124.27	1039.98	57.9501	-8.658	0	2.52861	2.88618	3.89	0.0273948	0
2000	1168	40.597	0.990518	0.991685	108.483	-516367	16.0425	-123.497	1031.06	57.3657	-8.67	0	2.5276	2.88578	3.905	0.0278411	0
2000	1167	40.2149	0.990635	0.99179	107.436	-511506	15.898	-122.741	1022.33	56.7943	-8.682	0	2.5266	2.88539	3.92	0.0282887	0
2000	1166	39.8411	0.99075	0.991893	106.411	-506751	15.7567	-122	1013.8	56.2356	-8.694	0	2.52561	2.88499	3.936	0.0287376	0
2000	1165	39.4755	0.990862	0.991993	105.408	-502100	15.6183	-121.274	1005.45	55.689	-8.705	0	2.52462	2.8846	3.951	0.0291878	0
2000	1164	39.1176	0.990972	0.992091	104.427	-497549	15.4829	-120.563	997.271	55.1543	-8.717	0	2.52365	2.88421	3.966	0.0296394	0
2000	1163	38.7673	0.991079	0.992187	103.466	-493095	15.3504	-119.865	989.268	54.631	-8.729	0	2.52267	2.88382	3.981	0.0300922	0
2000	1162	38.4243	0.991183	0.992281	102.525	-488735	15.2206	-119.181	981.432	54.1187	-8.741	0	2.52171	2.88343	3.996	0.0305462	0
2000	1161	38.0884	0.991285	0.992372	101.603	-484465	15.0934	-118.511	973.757	53.6171	-8.753	0	2.52075	2.88305	4.012	0.0310015	0
2000	1160	37.7593	0.991385	0.992461	100.699	-480284	14.9688	-117.853	966.238	53.1258	-8.765	0	2.5198	2.88266	4.026	0.031458	0
2000	1159	37.4369	0.991482	0.992548	99.8141	-476187	14.8467	-117.207	958.87	52.6446	-8.777	0	2.51886	2.88228	4.041	0.0319157	0
2000	1158	37.1209	0.991578	0.992634	98.9463	-472173	14.727	-116.574	951.648	52.173	-8.789	0	2.51792	2.88189	4.056	0.0323747	0
2000	1157	36.8111	0.991671	0.992717	98.0953	-468238	14.6097	-115.952	944.569	51.7109	-8.8	0	2.51699	2.88151	4.071	0.0328348	0
2000	1156	36.5074	0.991762	0.992799	97.2609	-464382	14.4946	-115.342	937.627	51.258	-8.812	0	2.51606	2.88113	4.086	0.0332961	0
2000	1155	36.2095	0.991852	0.992878	96.4423	-460600	14.3817	-114.742	930.818	50.8138	-8.824	0	2.51515	2.88076	4.101	0.0337585	0
2000	1154	35.9174	0.991939	0.992956	95.6392	-456891	14.271	-114.153	924.139	50.3783	-8.836	0	2.51423	2.88038	4.115	0.0342221	0
2000	1153	35.6307	0.992025	0.993033	94.8511	-453253	14.1623	-113.575	917.586	49.9511	-8.848	0	2.51333	2.88001	4.13	0.0346868	0
2000	1152	35.3494	0.992108	0.993108	94.0776	-449684	14.0557	-113.006	911.155	49.532	-8.86	0	2.51243	2.87964	4.144	0.0351526	0
2000	1151	35.0733	0.99219	0.993181	93.3182	-446182	13.951	-112.448	904.842	49.1207	-8.872	0	2.51154	2.87927	4.159	0.0356195	0
2000	1150	34.8023	0.992271	0.993253	92.5726	-442744	13.8482	-111.898	898.645	48.7171	-8.885	0	2.51065	2.8789	4.173	0.0360876	0
2000	1149	34.5362	0.99235	0.993323	91.8403	-439369	13.7472	-111.358	892.559	48.3209	-8.897	0	2.50977	2.87853	4.188	0.0365567	0
2000	1148	34.2749	0.992427	0.993392	91.1211	-436055	13.6481	-110.827	886.583	47.9319	-8.909	0	2.50889	2.87817	4.202	0.0370269	0
2000	1147	34.0182	0.992502	0.99346	90.4145	-432801	13.5507	-110.305	880.712	47.5499	-8.921	0	2.50802	2.87781	4.216	0.0374981	0
2000	1146	33.766	0.992577	0.993526	89.7201	-429605	13.455	-109.791	874.944	47.1747	-8.933	0	2.50716	2.87745	4.23	0.0379704	0
2000	1145	33.5183	0.992649	0.99359	89.0377	-426465	13.3609	-109.286	869.275	46.8061	-8.945	0	2.5063	2.87709	4.245	0.0384438	0
2000	1144	33.2748	0.99272	0.993654	88.367	-423380	13.2685	-108.788	863.705	46.444	-8.957	0	2.50545	2.87674	4.259	0.0389181	0
2000	1143	33.0355	0.99279	0.993716	87.7076	-420348	13.1776	-108.299	858.229	46.0882	-8.969	0	2.5046	2.87638	4.273	0.0393935	0
2000	1142	32.8002	0.992859	0.993778	87.0592	-417368	13.0883	-107.817	852.845	45.7384	-8.982	0	2.50376	2.87603	4.287	0.03987	0
2000	1141	32.5689	0.992926	0.993838	86.4215	-414438	13.0004	-107.343	847.551	45.3947	-8.994	0	2.50292	2.87568	4.301	0.0403474	0
2000	1140	32.3414	0.992992	0.993896	85.7943	-411558	12.914	-106.875	842.345	45.0567	-9.006	0	2.50209	2.87534	4.315	0.0408258	0
2000	1139	32.1176	0.993057	0.993954	85.1773	-408725	12.829	-106.415	837.223	44.7243	-9.018	0	2.50126	2.875	4.329	0.0413052	0
2000	1138	31.8975	0.993121	0.994011	84.5702	-405939	12.7453	-105.962	832.185	44.3975	-9.031	0	2.50044	2.87465	4.343	0.0417856	0
2000	1137	31.681	0.993183	0.994066	83.9728	-403199	12.663	-105.516	827.228	44.076	-9.043	0	2.49962	2.87432	4.356	0.042267	0
2000	1136	31.4679	0.993244	0.994121	83.3848	-400503	12.5821	-105.076	822.35	43.7597	-9.055	0	2.49881	2.87398	4.37	0.0427493	0
2000	1135	31.2583	0.993304	0.994175	82.806	-397850	12.5023	-104.642	817.548	43.4486	-9.067	0	2.49801	2.87365	4.384	0.0432326	0
2000	1134	31.0519	0.993363	0.994227	82.2363	-395240	12.4238	-104.215	812.822	43.1423	-9.08	0	2.49721	2.87331	4.398	0.0437169	0
2000	1133	30.8487	0.993421	0.994279	81.6752	-392670	12.3466	-103.794	808.169	42.841	-9.092	0	2.49641	2.87299	4.411	0.044202	0
2000	1132	30.6487	0.993478	0.99433	81.1228	-390141	12.2705	-103.379	803.587	42.5443	-9.105	0	2.49562	2.87266	4.425	0.0446882	0
2000	1131	30.4517	0.993534	0.994379	80.5786	-387651	12.1955	-102.969	799.075	42.2523	-9.117	0	2.49483	2.87234	4.439	0.0451752	0
2000	1130	30.2578	0.99359	0.994428	80.0427	-385200	12.1217	-102.566	794.631	41.9648	-9.129	0	2.49405	2.87202	4.452	0.0456632	0
2000	1129	30.0667	0.993644	0.994477	79.5146	-382785	12.049	-102.168	790.253	41.6817	-9.142	0	2.49327	2.8717	4.466	0.0461521	0
2000	1128	29.8785	0.993697	0.994524	78.9944	-380407	11.9774	-101.775	785.94	41.4028	-9.154	0	2.4925	2.87139	4.479	0.046642	0
2000	1127	29.6931	0.993749	0.99457	78.4817	-378065	11.9068	-101.388	781.69	41.1282	-9.167	0	2.49173	2.87107	4.492	0.0471327	0
2000	1126	29.5104	0.9938	0.994616	77.9764	-375757	11.8372	-101.006	777.503	40.8576	-9.179	0	2.49097	2.87077	4.506	0.0476243	0
2000	1125	29.3304	0.993851	0.994661	77.4784	-373484	11.7687	-100.628	773.376	40.5911	-9.192	0	2.49021	2.87046	4.519	0.0481169	0
2000	1124	29.1529	0.993901	0.994705	76.9875	-371243	11.7011	-100.256	769.307	40.3284	-9.204	0	2.48945	2.87016	4.532	0.0486103	0
2000	1123	28.978	0.993949	0.994749	76.5035	-369035	11.6345	-99.8891	765.297	40.0696	-9.217	0	2.4887	2.86986	4.546	0.0491046	0
2000	1122	28.8056	0.993997	0.994792	76.0263	-366859	11.5688	-99.5266	761.343	39.8145	-9.229	0	2.48796	2.86956	4.559	0.0495998	0
2000	1121	28.6356	0.994045	0.994834	75.5556	-364714	11.504	-99.1687	757.444	39.5631	-9.242	0	2.48721	2.86927	4.572	0.0500959	0
2000	1120	28.468	0.994091	0.994875	75.0915	-362599	11.4401	-98.8154	753.599	39.3152	-9.254	0	2.48647	2.86898	4.585	0.0505928	0
2000	1119	28.3027	0.994137	0.994916	74.6337	-360514	11.3771	-98.4665	749.807	39.0708	-9.267	0	2.48574	2.86869	4.598	0.0510907	0
2000	1118	28.1397	0.994182	0.994956	74.182	-358458	11.315	-98.122	746.066	38.8299	-9.28	0	2.48501	2.86841	4.611	0.0515893	0
2000	1117	27.9789	0.994226	0.994995	73.7365	-356430	11.2537	-97.7817	742.376	38.5922	-9.292	0	2.48428	2.86813	4.624	0.0520889	0
2000	1116	27.8203	0.99427	0.995034	73.2969	-354431	11.1932	-97.4456	738.736	38.3579	-9.305	0	2.48356	2.86785	4.637	0.0525893	0
2000	1115	27.6638	0.994313	0.995072	72.863	-352458	11.1335	-97.1136	735.143	38.1267	-9.318	0	2.48284	2.86758	4.65	0.0530905	0
2000	1114	27.5094	0.994355	0.99511	72.4349	-350512	11.0746	-96.7856	731.598	37.8987	-9.33	0	2.48213	2.86731	4.663	0.0535926	0
2000	1113	27.3571	0.994397	0.995147	72.0123	-348592	11.0165	-96.4616	728.1	37.6737	-9.343	0	2.48142	2.86704	4.676	0.0540956	0
2000	1112	27.2067	0.994438	0.995183	71.5952	-346697	10.9591	-96.1413	724.647	37.4518	-9.356	0	2.48071	2.86678	4.689	0.0545994	0
2000	1111	27.0583	0.994478	0.995219	71.1835	-344828	10.9024	-95.8249	721.238	37.2327	-9.368	0	2.48001	2.86652	4.702	0.055104	0
2000	1110	26.9118	0.994518	0.995254	70.7769	-342983	10.8465	-95.5121	717.872	37.0166	-9.381	0	2.47931	2.86626	4.714	0.0556094	0
2000	1109	26.7672	0.994557	0.995289	70.3755	-341162	10.7913	-95.203	714.55	36.8033	-9.394	0	2.47861	2.866	4.727	0.0561157	0
2000	1108	26.6244	0.994595	0.995323	69.9791	-339365	10.7368	-94.8973	711.269	36.5927	-9.407	0	2.47792	2.86576	4.74	0.0566229	0
2000	1107	26.4835	0.994633	0.995357	69.5877	-337590	10.683	-94.5952	708.028	36.3849	-9.42	0	2.47723	2.86551	4.753	0.0571308	0
2000	1106	26.3443	0.994671	0.99539	69.201	-335838	10.6298	-94.2965	704.828	36.1797	-9.432	0	2.47655	2.86527	4.765	0.0576396	0
2000	1105	26.2068	0.994708	0.995423	68.8191	-334109	10.5773	-94.0011	701.668	35.977	-9.445	0	2.47587	2.86503	4.778	0.0581492	0
2000	1104	26.071	0.994744	0.995455	68.4419	-332401	10.5254	-93.7091	698.546	35.777	-9.458	0	2.47519	2.86479	4.79	0.0586596	0
2000	1103	25.937	0.994778	0.995486	68.0691	-330714	10.4742	-93.4201	695.46	35.5794	-9.471	0	2.47451	2.86481	4.803	0.059171	0
2000	1102	25.8045	0.994788	0.995502	67.7007	-329048	10.4235	-93.1336	692.392	35.384	-9.484	0	2.47382	2.86815	4.816	0.0596856	0
2000	1101	25.6733	0.994809	0.995525	67.336	-327399	10.3734	-92.8502	689.358	35.1907	-9.497	0	2.47314	2.87114	4.828	0.060201	0
2000	1100	25.5438	0.994828	0.995548	66.9756	-325771	10.3239	-92.5698	686.359	34.9998	-9.51	0	2.47245	2.87418	4.841	0.0607173	0
2000	1099	25.4156	0.994854	0.995574	66.6192	-324161	10.2749	-92.2924	683.395	34.811	-9.523	0	2.47177	2.87595	4.854	0.0612344	0
2000	1098	25.2888	0.994887	0.995603	66.2665	-322569	10.2265	-92.0179	680.465	34.6243	-9.536	0	2.4711	2.87585	4.866	0.0617523	0
2000	1097	25.1634	0.99492	0.995633	65.9178	-320997	10.1786	-91.7464	677.569	34.4399	-9.549	0	2.47042	2.87575	4.879	0.062271	0
2000	1096	25.0395	0.994952	0.995662	65.5732	-319443	10.1312	-91.4777	674.706	34.2577	-9.562	0	2.46975	2.87566	4.891	0.0627906	0
2000	1095	24.9171	0.994984	0.99569	65.2325	-317907	10.0845	-91.2118	671.876	34.0776	-9.575	0	2.46909	2.87557	4.904	0.0633109	0
2000	1094	24.796	0.995016	0.995718	64.8957	-316390	10.0382	-90.9486	669.078	33.8997	-9.588	0	2.46842	2.87548	4.916	0.0638321	0
2000	1093	24.6764	0.995047	0.995746	64.5627	-314890	9.99248	-90.6882	666.311	33.7238	-9.601	0	2.46776	2.8754	4.929	0.0643541	0
2000	1092	24.5581	0.995077	0.995773	64.2334	-313408	9.94726	-90.4304	663.576	33.55	-9.614	0	2.4671	2.87533	4.941	0.0648768	0
2000	1091	24.4411	0.995108	0.9958	63.9077	-311942	9.90256	-90.1752	660.871	33.3781	-9.627	0	2.46645	2.87526	4.953	0.0654004	0
2000	1090	24.3255	0.995137	0.995827	63.5857	-310494	9.85835	-89.9225	658.195	33.2083	-9.64	0	2.4658	2.87519	4.966	0.0659248	0
2000	1089	24.2112	0.995167	0.995853	63.2671	-309062	9.81462	-89.6724	655.549	33.0404	-9.654	0	2.46515	2.87513	4.978	0.0664501	0
2000	1088	24.0981	0.995196	0.995879	62.9521	-307646	9.77138	-89.4247	652.932	32.8743	-9.667	0	2.4645	2.87508	4.99	0.0669761	0
2000	1087	23.9863	0.995224	0.995904	62.6404	-306246	9.72861	-89.1795	650.343	32.7102	-9.68	0	2.46386	2.87502	5.002	0.0675029	0
2000	1086	23.8757	0.995253	0.99593	62.3321	-304861	9.6863	-88.9366	647.782	32.5479	-9.693	0	2.46322	2.87498	5.015	0.0680305	0
2000	1085	23.7663	0.99528	0.995955	62.0271	-303492	9.64444	-88.6962	645.248	32.3873	-9.706	0	2.46258	2.87494	5.027	0.0685589	0
2000	1084	23.6581	0.995308	0.995979	61.7253	-302138	9.60304	-88.458	642.741	32.2286	-9.72	0	2.46194	2.8749	5.039	0.0690882	0
2000	1083	23.551	0.995335	0.996003	61.4267	-300799	9.56207	-88.2221	640.26	32.0716	-9.733	0	2.46131	2.87487	5.051	0.0696182	0
2000	1082	23.4451	0.995362	0.996027	61.1312	-299474	9.52153	-87.9884	637.805	31.9162	-9.746	0	2.46068	2.87485	5.063	0.070149	0
2000	1081	23.3403	0.995388	0.996051	60.8387	-298164	9.48142	-87.7569	635.375	31.7626	-9.76	0	2.46005	2.87483	5.075	0.0706807	0
2000	1080	23.2366	0.995414	0.996074	60.5493	-296867	9.44172	-87.5276	632.97	31.6106	-9.773	0	2.45943	2.87481	5.088	0.0712131	0
2000	1079	23.134	0.99544	0.996097	60.2629	-295585	9.40243	-87.3004	630.59	31.4603	-9.786	0	2.4588	2.8748	5.1	0.0717464	0
2000	1078	23.0325	0.995465	0.99612	59.9793	-294316	9.36355	-87.0752	628.234	31.3115	-9.8	0	2.45818	2.8748	5.112	0.0722804	0
2000	1077	22.932	0.99549	0.996142	59.6987	-293060	9.32506	-86.8522	625.902	31.1643	-9.813	0	2.45757	2.8748	5.124	0.0728152	0
2000	1076	22.8325	0.995515	0.996164	59.4208	-291818	9.28697	-86.6311	623.593	31.0186	-9.827	0	2.45695	2.87481	5.136	0.0733509	0
2000	1075	22.7341	0.995539	0.996186	59.1458	-290588	9.24925	-86.4121	621.307	30.8745	-9.84	0	2.45634	2.87482	5.148	0.0738873	0
2000	1074	22.6366	0.995563	0.996208	58.8734	-289371	9.21192	-86.195	619.043	30.7318	-9.853	0	2.45573	2.87484	5.159	0.0744246	0
2000	1073	22.5401	0.995587	0.996229	58.6038	-288167	9.17495	-85.9799	616.802	30.5906	-9.867	0	2.45512	2.87486	5.171	0.0749626	0
2000	1072	22.4446	0.995611	0.99625	58.3367	-286975	9.13835	-85.7666	614.582	30.4509	-9.88	0	2.45451	2.87489	5.183	0.0755015	0
2000	1071	22.3501	0.995634	0.996271	58.0723	-285795	9.10211	-85.5552	612.384	30.3125	-9.894	0	2.45391	2.87493	5.195	0.0760412	0
2000	1070	22.2564	0.995657	0.996291	57.8104	-284627	9.06623	-85.3457	610.207	30.1756	-9.907	0	2.45331	2.87497	5.207	0.0765816	0
2000	1069	22.1637	0.995679	0.996312	57.5511	-283471	9.03069	-85.1379	608.051	30.04	-9.921	0	2.45271	2.87501	5.219	0.0771229	0
2000	1068	22.0719	0.995702	0.996332	57.2942	-282326	8.9955	-84.932	605.915	29.9058	-9.935	0	2.45211	2.87507	5.23	0.077665	0
2000	1067	21.981	0.995724	0.996351	57.0398	-281193	8.96064	-84.7278	603.799	29.7729	-9.948	0	2.45152	2.87513	5.242	0.0782079	0
2000	1066	21.891	0.995745	0.996371	56.7877	-280071	8.92611	-84.5253	601.703	29.6414	-9.962	0	2.45092	2.87519	5.254	0.0787516	0
2000	1065	21.8018	0.995767	0.99639	56.5381	-278959	8.89191	-84.3245	599.626	29.5111	-9.975	0	2.45033	2.87526	5.266	0.0792961	0
2000	1064	21.7135	0.995788	0.996409	56.2907	-277859	8.85803	-84.1254	597.569	29.382	-9.989	0	2.44975	2.87534	5.277	0.0798415	0
2000	1063	21.626	0.995809	0.996428	56.0456	-276769	8.82447	-83.928	595.53	29.2543	-10.003	0	2.44916	2.87543	5.289	0.0803876	0
2000	1062	21.5393	0.99583	0.996447	55.8028	-275690	8.79122	-83.7322	593.51	29.1277	-10.016	0	2.44857	2.87552	5.301	0.0809346	0
2000	1061	21.4534	0.99585	0.996465	55.5622	-274621	8.75828	-83.538	591.508	29.0024	-10.03	0	2.44799	2.87561	5.312	0.0814824	0
2000	1060	21.3684	0.99587	0.996483	55.3238	-273563	8.72564	-83.3454	589.524	28.8782	-10.044	0	2.44741	2.87572	5.324	0.082031	0
2000	1059	21.2841	0.99589	0.996501	55.0876	-272514	8.6933	-83.1543	587.558	28.7552	-10.058	0	2.44683	2.87583	5.336	0.0825804	0
2000	1058	21.2006	0.99591	0.996519	54.8535	-271475	8.66125	-82.9648	585.609	28.6334	-10.071	0	2.44625	2.87595	5.347	0.0831307	0
2000	1057	21.1178	0.995929	0.996537	54.6214	-270446	8.62949	-82.7767	583.677	28.5127	-10.085	0	2.44568	2.87607	5.359	0.0836817	0
2000	1056	21.0358	0.995949	0.996554	54.3914	-269426	8.59802	-82.5902	581.762	28.3931	-10.099	0	2.4451	2.8762	5.37	0.0842337	0
2000	1055	20.9546	0.995968	0.996571	54.1635	-268416	8.56683	-82.4052	579.864	28.2747	-10.113	0	2.44453	2.87634	5.382	0.0847864	0
2000	1054	20.874	0.995986	0.996588	53.9375	-267416	8.53591	-82.2216	577.982	28.1573	-10.127	0	2.44396	2.87649	5.393	0.08534	0
2000	1053	20.7942	0.996005	0.996605	53.7135	-266424	8.50526	-82.0394	576.116	28.041	-10.141	0	2.44339	2.87664	5.405	0.0858944	0
2000	1052	20.7151	0.996023	0.996621	53.4914	-265441	8.47489	-81.8586	574.266	27.9257	-10.155	0	2.44283	2.8768	5.416	0.0864496	0
2000	1051	20.6367	0.996041	0.996637	53.2713	-264468	8.44478	-81.6792	572.432	27.8115	-10.169	0	2.44226	2.87697	5.428	0.0870057	0
2000	1050	20.5589	0.996059	0.996654	53.053	-263503	8.41493	-81.5012	570.613	27.6983	-10.183	0	2.4417	2.87714	5.439	0.0875626	0
2000	1049	20.4819	0.996077	0.99667	52.8366	-262546	8.38533	-81.3246	568.809	27.5861	-10.196	0	2.44113	2.87732	5.45	0.0881204	0
2000	1048	20.4055	0.996094	0.996685	52.622	-261598	8.35599	-81.1492	567.02	27.4749	-10.21	0	2.44057	2.87751	5.462	0.0886791	0
2000	1047	20.3298	0.996112	0.996701	52.4092	-260659	8.3269	-80.9752	565.246	27.3647	-10.224	0	2.44001	2.87771	5.473	0.0892385	0
2000	1046	20.2547	0.996129	0.996716	52.1982	-259728	8.29805	-80.8025	563.487	27.2554	-10.239	0	2.43946	2.87792	5.484	0.0897989	0
2000	1045	20.1802	0.996145	0.996732	51.9889	-258805	8.26945	-80.631	561.741	27.1471	-10.253	0	2.4389	2.87813	5.496	0.0903601	0
2000	1044	20.1064	0.996162	0.996747	51.7814	-257890	8.24109	-80.4608	560.01	27.0397	-10.267	0	2.43834	2.87835	5.507	0.0909221	0
2000	1043	20.0332	0.996178	0.996762	51.5756	-256983	8.21296	-80.2919	558.292	26.9333	-10.281	0	2.43779	2.87858	5.518	0.0914851	0
2000	1042	19.9606	0.996195	0.996776	51.3714	-256084	8.18506	-80.1242	556.589	26.8277	-10.295	0	2.43724	2.87882	5.53	0.0920489	0
2000	1041	19.8886	0.996211	0.996791	51.1689	-255192	8.1574	-79.9577	554.898	26.7231	-10.309	0	2.43669	2.87907	5.541	0.0926136	0
2000	1040	19.8172	0.996226	0.996805	50.9681	-254308	8.12996	-79.7924	553.221	26.6193	-10.323	0	2.43614	2.87932	5.552	0.0931791	0
2000	1039	19.7464	0.996242	0.99682	50.7688	-253432	8.10274	-79.6282	551.557	26.5164	-10.337	0	2.43559	2.87959	5.563	0.0937455	0
2000	1038	19.6762	0.996257	0.996834	50.5711	-252563	8.07575	-79.4652	549.906	26.4144	-10.352	0	2.43504	2.87986	5.575	0.0943129	0
2000	1037	19.6065	0.996273	0.996848	50.375	-251701	8.04897	-79.3034	548.267	26.3132	-10.366	0	2.4345	2.88014	5.586	0.0948811	0
2000	1036	19.5374	0.996288	0.996861	50.1804	-250847	8.0224	-79.1427	546.641	26.2129	-10.38	0	2.43395	2.88043	5.597	0.0954502	0
2000	1035	19.4688	0.996303	0.996875	49.9874	-249999	7.99605	-78.9832	545.028	26.1133	-10.394	0	2.43341	2.88073	5.608	0.0960202	0
2000	1034	19.4008	0.996317	0.996889	49.7959	-249159	7.9699	-78.8247	543.426	26.0146	-10.409	0	2.43286	2.88104	5.619	0.0965911	0
2000	1033	19.3333	0.996332	0.996902	49.6058	-248325	7.94396	-78.6673	541.837	25.9167	-10.423	0	2.43232	2.88136	5.63	0.0971629	0
2000	1032	19.2664	0.996346	0.996915	49.4172	-247498	7.91822	-78.511	540.259	25.8196	-10.437	0	2.43178	2.88169	5.641	0.0977357	0
2000	1031	19.1999	0.996361	0.996928	49.23	-246678	7.89269	-78.3557	538.693	25.7232	-10.452	0	2.43124	2.88203	5.653	0.0983093	0
2000	1030	19.134	0.996375	0.996941	49.0443	-245865	7.86735	-78.2015	537.138	25.6277	-10.466	0	2.4307	2.88238	5.664	0.0988839	0
2000	1029	19.0686	0.996388	0.996954	48.8599	-245058	7.8422	-78.0484	535.595	25.5328	-10.48	0	2.43016	2.88273	5.675	0.0994594	0
2000	1028	19.0037	0.996402	0.996966	48.677	-244258	7.81724	-77.8962	534.062	25.4388	-10.495	0	2.42963	2.8831	5.686	0.100036	0
2000	1027	18.9393	0.996416	0.996979	48.4954	-243464	7.79248	-77.7451	532.541	25.3454	-10.509	0	2.42909	2.88348	5.697	0.100613	0
2000	1026	18.8754	0.996429	0.996991	48.3152	-242676	7.7679	-77.595	531.031	25.2528	-10.524	0	2.42855	2.88387	5.708	0.101192	0
2000	1025	18.812	0.996442	0.997003	48.1362	-241894	7.74351	-77.4458	529.531	25.161	-10.538	0	2.42802	2.88428	5.719	0.101771	0
2000	1024	18.749	0.996455	0.997015	47.9586	-241119	7.7193	-77.2976	528.042	25.0698	-10.553	0	2.42748	2.88469	5.73	0.102351	0
2000	1023	18.6865	0.996468	0.997027	47.7823	-240349	7.69527	-77.1504	526.573	24.9796	-10.567	0	2.42695	2.88511	5.741	0.102932	0
2000	1022	18.6245	0.996481	0.997039	47.6073	-239586	7.67142	-77.0042	525.104	24.8898	-10.582	0	2.42642	2.88554	5.752	0.103514	0
2000	1021	18.5629	0.996493	0.997051	47.4335	-238828	7.64774	-76.8588	523.645	24.8007	-10.596	0	2.42589	2.88598	5.763	0.104097	0
2000	1020	18.5018	0.996506	0.997062	47.261	-238077	7.62424	-76.7144	522.197	24.7123	-10.611	0	2.42535	2.88643	5.774	0.104682	0
2000	1019	18.4411	0.996518	0.997073	47.0897	-237331	7.6009	-76.5709	520.758	24.6245	-10.626	0	2.42482	2.8869	5.785	0.105267	0
2000	1018	18.3809	0.99653	0.997085	46.9196	-236590	7.57773	-76.4283	519.328	24.5374	-10.64	0	2.42429	2.88738	5.796	0.105853	0
2000	1017	18.3211	0.996542	0.997096	46.7507	-235855	7.55473	-76.2866	517.908	24.4509	-10.655	0	2.42376	2.88786	5.807	0.10644	0
2000	1016	18.2617	0.996553	0.997107	46.5829	-235126	7.5319	-76.1457	516.498	24.365	-10.67	0	2.42323	2.88836	5.818	0.107028	0
2000	1015	18.2027	0.996565	0.997118	46.4164	-234402	7.50922	-76.0057	515.096	24.2798	-10.684	0	2.4227	2.88888	5.829	0.107617	0
2000	1014	18.1441	0.996576	0.997128	46.251	-233684	7.4867	-75.8666	513.704	24.1952	-10.699	0	2.42217	2.88941	5.839	0.108208	0
2000	1013	18.086	0.996588	0.997139	46.0867	-232971	7.46435	-75.7283	512.321	24.1112	-10.714	0	2.42164	2.88995	5.85	0.108799	0
2000	1012	18.0282	0.996599	0.99715	45.9235	-232263	7.44215	-75.5909	510.946	24.0278	-10.729	0	2.42111	2.8905	5.861	0.109391	0
2000	1011	17.9709	0.99661	0.99716	45.7614	-231560	7.4201	-75.4543	509.58	23.945	-10.744	0	2.42059	2.89107	5.872	0.109985	0
2000	1010	17.914	0.996621	0.99717	45.6005	-230862	7.3982	-75.3185	508.223	23.8628	-10.758	0	2.42006	2.89165	5.883	0.110579	0
2000	1009	17.8574	0.996631	0.99718	45.4406	-230170	7.37646	-75.1835	506.874	23.7811	-10.773	0	2.41953	2.89224	5.894	0.111175	0
2000	1008	17.8012	0.996642	0.99719	45.2817	-229482	7.35486	-75.0494	505.534	23.7001	-10.788	0	2.419	2.89284	5.905	0.111771	0
2000	1007	17.7454	0.996652	0.9972	45.124	-228799	7.33341	-74.916	504.202	23.6196	-10.803	0	2.41847	2.89347	5.916	0.112369	0
2000	1006	17.69	0.996663	0.99721	44.9672	-228121	7.3121	-74.7834	502.878	23.5396	-10.818	0	2.41795	2.8941	5.926	0.112968	0
2000	1005	17.6349	0.996673	0.99722	44.8115	-227448	7.29094	-74.6516	501.561	23.4602	-10.833	0	2.41742	2.89475	5.937	0.113567	0
2000	1004	17.5802	0.996683	0.99723	44.6568	-226780	7.26992	-74.5205	500.253	23.3814	-10.848	0	2.41689	2.89541	5.948	0.114168	0
2000	1003	17.5259	0.996693	0.997239	44.5031	-226116	7.24903	-74.3902	498.953	23.303	-10.863	0	2.41636	2.89609	5.959	0.11477	0
2000	1002	17.4719	0.996703	0.997249	44.3503	-225457	7.22829	-74.2607	497.66	23.2253	-10.878	0	2.41583	2.89678	5.97	0.115373	0
2000	1001	17.4183	0.996712	0.997258	44.1986	-224803	7.20768	-74.1319	496.374	23.148	-10.893	0	2.4153	2.89749	5.981	0.115978	0
2000	1000	17.365	0.996722	0.997267	44.0478	-224153	7.18721	-74.0038	495.096	23.0712	-10.908	0	2.41477	2.89821	5.991	0.116583	0
2000	999	17.312	0.996731	0.997276	43.8979	-223508	7.16687	-73.8764	493.826	22.995	-10.923	0	2.41424	2.89894	6.002	0.11719	0
2000	998	17.2594	0.996741	0.997285	43.749	-222867	7.14666	-73.7498	492.562	22.9193	-10.938	0	2.41371	2.89969	6.013	0.117797	0
2000	997	17.2071	0.99675	0.997294	43.601	-222230	7.12658	-73.6239	491.306	22.844	-10.953	0	2.41318	2.90046	6.024	0.118406	0
2000	996	17.1552	0.996759	0.997303	43.454	-221598	7.10663	-73.4987	490.056	22.7693	-10.968	0	2.41265	2.90124	6.035	0.119016	0
2000	995	17.1036	0.996768	0.997312	43.3078	-220970	7.0868	-73.3742	488.814	22.695	-10.984	0	2.41212	2.90203	6.045	0.119627	0
2000	994	17.0523	0.996777	0.997321	43.1626	-220346	7.0671	-73.2503	487.578	22.6212	-10.999	0	2.41159	2.90284	6.056	0.12024	0
2000	993	17.0013	0.996785	0.997329	43.0182	-219727	7.04753	-73.1272	486.349	22.5479	-11.014	0	2.41106	2.90366	6.067	0.120853	0
2000	992	16.9506	0.996794	0.997338	42.8747	-219111	7.02808	-73.0047	485.127	22.4751	-11.029	0	2.41052	2.9045	6.078	0.121468	0
2000	991	16.9002	0.996803	0.997346	42.7321	-218500	7.00875	-72.8829	483.911	22.4027	-11.045	0	2.40999	2.90535	6.089	0.122084	0
2000	990	16.8502	0.996811	0.997355	42.5903	-217893	6.98954	-72.7618	482.701	22.3308	-11.06	0	2.40946	2.90621	6.099	0.122701	0
2000	989	16.8004	0.996819	0.997363	42.4493	-217289	6.97045	-72.6413	481.498	22.2593	-11.075	0	2.40892	2.90709	6.11	0.123319	0
2000	988	16.751	0.996828	0.997371	42.3092	-216690	6.95148	-72.5215	480.301	22.1883	-11.091	0	2.40839	2.90798	6.121	0.123938	0
2000	987	16.7018	0.996836	0.997379	42.1699	-216095	6.93262	-72.4023	479.111	22.1177	-11.106	0	2.40785	2.90889	6.132	0.124559	0
2000	986	16.6529	0.996844	0.997387	42.0315	-215503	6.91388	-72.2838	477.926	22.0475	-11.121	0	2.40731	2.90981	6.143	0.125181	0
2000	985	16.6044	0.996852	0.997395	41.8938	-214915	6.89525	-72.1659	476.747	21.9778	-11.137	0	2.40677	2.91074	6.153	0.125804	0
2000	984	16.5561	0.996859	0.997403	41.757	-214331	6.87673	-72.0486	475.574	21.9085	-11.152	0	2.40624	2.91168	6.164	0.126428	0
2000	983	16.508	0.996867	0.997411	41.6209	-213751	6.85833	-71.9319	474.407	21.8396	-11.168	0	2.4057	2.91264	6.175	0.127054	0
2000	982	16.4603	0.996875	0.997419	41.4856	-213175	6.84003	-71.8159	473.246	21.7712	-11.183	0	2.40515	2.91361	6.186	0.12768	0
2000	981	16.4128	0.996882	0.997426	41.3511	-212602	6.82185	-71.7004	472.091	21.7031	-11.199	0	2.40461	2.9146	6.196	0.128308	0
2000	980	16.3657	0.99689	0.997434	41.2173	-212032	6.80377	-71.5856	470.941	21.6355	-11.214	0	2.40407	2.91559	6.207	0.128937	0
2000	979	16.3187	0.996897	0.997442	41.0843	-211467	6.7858	-71.4714	469.796	21.5683	-11.23	0	2.40352	2.9166	6.218	0.129568	0
2000	978	16.2721	0.996904	0.997449	40.9521	-210905	6.76793	-71.3578	468.657	21.5014	-11.246	0	2.40298	2.91762	6.229	0.1302	0
2000	977	16.2257	0.996912	0.997457	40.8205	-210346	6.75017	-71.2447	467.523	21.435	-11.261	0	2.40243	2.91865	6.24	0.130832	0
2000	976	16.1796	0.996919	0.997464	40.6898	-209791	6.73252	-71.1323	466.395	21.369	-11.277	0	2.40188	2.91969	6.25	0.131467	0
2000	975	16.1337	0.996926	0.997471	40.5597	-209240	6.71497	-71.0204	465.272	21.3033	-11.293	0	2.40133	2.92075	6.261	0.132102	0
2000	974	16.0881	0.996933	0.997478	40.4304	-208692	6.69751	-70.9092	464.153	21.238	-11.308	0	2.40078	2.92182	6.272	0.132739	0
2000	973	16.0427	0.99694	0.997486	40.3017	-208147	6.68016	-70.7984	463.04	21.1731	-11.324	0	2.40023	2.9229	6.283	0.133377	0
2000	972	15.9976	0.996947	0.997493	40.1738	-207606	6.66291	-70.6883	461.932	21.1086	-11.34	0	2.39968	2.924	6.294	0.134016	0
2000	971	15.9528	0.996953	0.9975	40.0466	-207068	6.64576	-70.5787	460.829	21.0444	-11.355	0	2.39913	2.92511	6.304	0.134656	0
2000	970	15.9081	0.99696	0.997507	39.92	-206533	6.62871	-70.4697	459.731	20.9807	-11.371	0	2.39857	2.92624	6.315	0.135298	0
2000	969	15.8638	0.996967	0.997514	39.7942	-206001	6.61175	-70.3613	458.637	20.9172	-11.387	0	2.39801	2.92739	6.326	0.135941	0
2000	968	15.8196	0.996973	0.997521	39.669	-205473	6.59489	-70.2534	457.549	20.8542	-11.403	0	2.39745	2.92855	6.337	0.136585	0
2000	967	15.7757	0.99698	0.997528	39.5445	-204948	6.57813	-70.146	456.464	20.7915	-11.419	0	2.39689	2.92974	6.348	0.13723	0
2000	966	15.7321	0.996986	0.997534	39.4206	-204426	6.56146	-70.0392	455.384	20.7291	-11.435	0	2.39633	2.93097	6.359	0.137877	0
2000	965	15.6887	0.996992	0.997541	39.2974	-203908	6.54488	-69.9329	454.309	20.6671	-11.451	0	2.39577	2.93223	6.369	0.138525	0
2000	964	15.6455	0.996998	0.997548	39.1748	-203392	6.5284	-69.8272	453.238	20.6054	-11.467	0	2.3952	2.93354	6.38	0.139174	0
2000	963	15.6025	0.997004	0.997554	39.0529	-202880	6.51201	-69.722	452.17	20.5441	-11.483	0	2.39463	2.93493	6.391	0.139824	0
2000	962	15.5597	0.997009	0.99756	38.9316	-202370	6.49571	-69.6173	451.107	20.4831	-11.499	0	2.39406	2.93641	6.402	0.140476	0
2000	961	15.5172	0.997014	0.997566	38.8109	-201864	6.4795	-69.5132	450.046	20.4224	-11.515	0	2.39349	2.93805	6.413	0.141129	0
2000	960	15.4749	0.997019	0.997572	38.6907	-201360	6.46337	-69.4096	448.989	20.362	-11.531	0	2.39291	2.93994	6.424	0.141784	0
2000	959	15.4327	0.997022	0.997577	38.5711	-200860	6.44733	-69.3065	447.933	20.3019	-11.547	0	2.39233	2.94225	6.435	0.14244	0
2000	958	15.3907	0.997022	0.997581	38.4521	-200362	6.43137	-69.2039	446.877	20.242	-11.563	0	2.39174	2.94543	6.446	0.143098	0
2000	957	15.3489	0.997141	0.997646	38.334	-199865	6.41542	-69.1019	445.911	20.1831	-11.579	0	2.39128	2.90535	6.456	0.143748	0
2000	956	15.3079	0.997164	0.99766	38.2178	-199376	6.39975	-69.0004	444.913	20.1249	-11.595	0	2.39077	2.89833	6.466	0.144403	0
2000	955	15.2677	0.996816	0.997482	38.1007	-198897	6.38441	-68.8994	443.65	20.065	-11.611	0	2.3898	3.02353	6.48	0.145086	0
2000	954	15.2225	0.996827	0.997499	37.9741	-198388	6.36796	-68.7983	442.384	20.0011	-11.628	0	2.38887	3.03327	6.494	0.145769	0
2000	953	15.1773	0.996854	0.997518	37.8478	-197883	6.35161	-68.6976	441.128	19.9374	-11.644	0	2.38793	3.02903	6.508	0.146454	0
2000	952	15.1327	0.99687	0.997531	37.723	-197384	6.33542	-68.5975	439.886	19.8744	-11.66	0	2.387	3.02824	6.522	0.147138	0
2000	951	15.0885	0.996885	0.997543	37.5991	-196889	6.31936	-68.4982	438.653	19.8119	-11.676	0	2.38608	3.02745	6.536	0.147823	0
2000	950	15.0446	0.996899	0.997555	37.4761	-196398	6.30342	-68.3995	437.431	19.75	-11.693	0	2.38516	3.02667	6.55	0.148508	0
2000	949	15.0011	0.996914	0.997567	37.3542	-195911	6.28761	-68.3014	436.219	19.6885	-11.709	0	2.38425	3.02589	6.563	0.149194	0
2000	948	14.9579	0.996929	0.997579	37.2331	-195428	6.27192	-68.204	435.016	19.6276	-11.725	0	2.38335	3.02512	6.577	0.149879	0
2000	947	14.9151	0.996943	0.997591	37.113	-194948	6.25635	-68.1072	433.824	19.5671	-11.742	0	2.38245	3.02435	6.591	0.150565	0
2000	946	14.8726	0.996958	0.997602	36.9938	-194472	6.24089	-68.011	432.641	19.5071	-11.758	0	2.38155	3.02359	6.604	0.151251	0
2000	945	14.8305	0.996972	0.997614	36.8755	-194001	6.22556	-67.9155	431.467	19.4477	-11.775	0	2.38066	3.02284	6.618	0.151937	0
2000	944	14.7887	0.996986	0.997625	36.7581	-193532	6.21034	-67.8205	430.303	19.3886	-11.791	0	2.37978	3.02209	6.631	0.152624	0
2000	943	14.7473	0.997	0.997636	36.6415	-193068	6.19523	-67.7262	429.148	19.3301	-11.808	0	2.3789	3.02134	6.645	0.153311	0
2000	942	14.7061	0.997014	0.997648	36.5259	-192607	6.18024	-67.6324	428.002	19.272	-11.824	0	2.37803	3.0206	6.658	0.153998	0
2000	941	14.6654	0.997028	0.997659	36.4111	-192149	6.16536	-67.5393	426.865	19.2144	-11.841	0	2.37717	3.01986	6.672	0.154686	0
2000	940	14.6249	0.997041	0.99767	36.2971	-191695	6.15059	-67.4467	425.737	19.1572	-11.857	0	2.3763	3.01913	6.685	0.155373	0
2000	939	14.5847	0.997055	0.997681	36.184	-191244	6.13593	-67.3547	424.618	19.1005	-11.874	0	2.37545	3.01841	6.698	0.156061	0
2000	938	14.5449	0.997068	0.997691	36.0717	-190797	6.12138	-67.2632	423.507	19.0442	-11.891	0	2.3746	3.01769	6.711	0.156749	0
2000	937	14.5054	0.997081	0.997702	35.9603	-190354	6.10693	-67.1724	422.405	18.9883	-11.907	0	2.37375	3.01697	6.724	0.157438	0
2000	936	14.4661	0.997095	0.997713	35.8496	-189913	6.09259	-67.082	421.312	18.9329	-11.924	0	2.37291	3.01626	6.737	0.158127	0
2000	935	14.4272	0.997108	0.997723	35.7398	-189476	6.07836	-66.9923	420.227	18.8779	-11.941	0	2.37207	3.01555	6.75	0.158816	0
2000	934	14.3886	0.997121	0.997734	35.6307	-189042	6.06422	-66.903	419.15	18.8233	-11.958	0	2.37124	3.01485	6.763	0.159505	0
2000	933	14.3503	0.997133	0.997744	35.5224	-188612	6.05019	-66.8144	418.081	18.7692	-11.974	0	2.37042	3.01415	6.776	0.160195	0
2000	932	14.3122	0.997146	0.997754	35.4149	-188184	6.03626	-66.7262	417.02	18.7154	-11.991	0	2.3696	3.01345	6.789	0.160885	0
2000	931	14.2745	0.997159	0.997765	35.3082	-187760	6.02243	-66.6386	415.967	18.6621	-12.008	0	2.36878	3.01276	6.802	0.161575	0
2000	930	14.237	0.997171	0.997775	35.2022	-187339	6.0087	-66.5515	414.923	18.6091	-12.025	0	2.36797	3.01208	6.815	0.162265	0
2000	929	14.1999	0.997184	0.997785	35.097	-186921	5.99506	-66.4649	413.885	18.5566	-12.042	0	2.36717	3.0114	6.828	0.162956	0
2000	928	14.163	0.997196	0.997795	34.9925	-186506	5.98152	-66.3788	412.856	18.5044	-12.059	0	2.36637	3.01072	6.84	0.163647	0
2000	927	14.1264	0.997208	0.997805	34.8887	-186094	5.96808	-66.2933	411.834	18.4527	-12.076	0	2.36557	3.01005	6.853	0.164338	0
2000	926	14.09	0.99722	0.997814	34.7857	-185685	5.95473	-66.2082	410.82	18.4013	-12.093	0	2.36478	3.00938	6.866	0.16503	0
2000	925	14.054	0.997232	0.997824	34.6833	-185279	5.94148	-66.1236	409.813	18.3503	-12.11	0	2.364	3.00872	6.878	0.165722	0
2000	924	14.0182	0.997244	0.997834	34.5817	-184875	5.92831	-66.0396	408.813	18.2996	-12.127	0	2.36322	3.00806	6.891	0.166414	0
2000	923	13.9826	0.997256	0.997843	34.4808	-184475	5.91524	-65.956	407.821	18.2494	-12.144	0	2.36244	3.0074	6.903	0.167107	0
2000	922	13.9474	0.997268	0.997853	34.3806	-184078	5.90226	-65.8728	406.835	18.1995	-12.161	0	2.36167	3.00675	6.916	0.1678	0
2000	921	13.9123	0.997279	0.997862	34.2811	-183683	5.88937	-65.7902	405.857	18.15	-12.178	0	2.3609	3.0061	6.928	0.168493	0
2000	920	13.8776	0.997291	0.997871	34.1822	-183292	5.87657	-65.708	404.886	18.1008	-12.195	0	2.36014	3.00545	6.94	0.169187	0
2000	919	13.8431	0.997302	0.997881	34.084	-182903	5.86385	-65.6263	403.922	18.052	-12.212	0	2.35938	3.00481	6.953	0.16988	0
2000	918	13.8088	0.997314	0.99789	33.9865	-182516	5.85122	-65.5451	402.964	18.0035	-12.23	0	2.35863	3.00418	6.965	0.170575	0
2000	917	13.7748	0.997325	0.997899	33.8896	-182133	5.83868	-65.4643	402.013	17.9554	-12.247	0	2.35788	3.00354	6.977	0.171269	0
2000	916	13.7411	0.997336	0.997908	33.7934	-181752	5.82622	-65.384	401.069	17.9076	-12.264	0	2.35714	3.00291	6.989	0.171964	0
2000	915	13.7076	0.997347	0.997917	33.6978	-181374	5.81385	-65.3041	400.132	17.8602	-12.281	0	2.3564	3.00229	7.001	0.172659	0
2000	914	13.6743	0.997358	0.997926	33.6028	-180998	5.80156	-65.2247	399.201	17.8131	-12.299	0	2.35566	3.00167	7.013	0.173354	0
2000	913	13.6412	0.997369	0.997935	33.5085	-180625	5.78935	-65.1457	398.276	17.7663	-12.316	0	2.35493	3.00105	7.025	0.17405	0
2000	912	13.6084	0.99738	0.997943	33.4148	-180255	5.77722	-65.0671	397.358	17.7199	-12.333	0	2.35421	3.00043	7.037	0.174746	0
2000	911	13.5759	0.997391	0.997952	33.3218	-179887	5.76517	-64.989	396.446	17.6738	-12.351	0	2.35349	2.99982	7.049	0.175443	0
2000	910	13.5435	0.997402	0.997961	33.2293	-179522	5.75321	-64.9113	395.541	17.628	-12.368	0	2.35277	2.99921	7.061	0.17614	0
2000	909	13.5114	0.997412	0.997969	33.1374	-179159	5.74132	-64.834	394.641	17.5825	-12.386	0	2.35206	2.9986	7.073	0.176837	0
2000	908	13.4796	0.997423	0.997978	33.0461	-178799	5.72951	-64.7572	393.748	17.5374	-12.403	0	2.35135	2.998	7.085	0.177534	0
2000	907	13.4479	0.997434	0.997986	32.9555	-178441	5.71777	-64.6807	392.861	17.4925	-12.421	0	2.35064	2.99741	7.096	0.178232	0
2000	906	13.4165	0.997444	0.997995	32.8654	-178086	5.70612	-64.6047	391.979	17.448	-12.438	0	2.34994	2.99681	7.108	0.178931	0
2000	905	13.3853	0.997454	0.998003	32.7759	-177732	5.69454	-64.5291	391.104	17.4038	-12.456	0	2.34925	2.99622	7.12	0.179629	0
2000	904	13.3543	0.997465	0.998011	32.6869	-177382	5.68304	-64.4539	390.235	17.3599	-12.474	0	2.34856	2.99563	7.131	0.180328	0
2000	903	13.3235	0.997475	0.998019	32.5985	-177033	5.67161	-64.379	389.371	17.3162	-12.491	0	2.34787	2.99505	7.143	0.181027	0
2000	902	13.2929	0.997485	0.998027	32.5107	-176687	5.66025	-64.3046	388.513	17.2729	-12.509	0	2.34719	2.99446	7.154	0.181727	0
2000	901	13.2625	0.997495	0.998036	32.4235	-176344	5.64897	-64.2306	387.66	17.2299	-12.527	0	2.34651	2.99389	7.166	0.182427	0
2000	900	13.2324	0.997505	0.998044	32.3368	-176002	5.63776	-64.157	386.813	17.1871	-12.544	0	2.34584	2.99331	7.177	0.183128	0
Title:	O-magma	-	opx	at	liquidus
Liquid	Composition:
Pressure	Temperature	mass	SiO2	TiO2	Al2O3	Fe2O3	Cr2O3	FeO	MgO	CaO	Na2O	K2O	H2O
2000	1400	99.7975	55.4373	0.132268	17.9964	0.698981	0.0100203	3.95591	8.23668	10.88	2.34776	0.101205	0.203412
2000	1400	99.7975	55.4373	0.132268	17.9964	0.698981	0.0100203	3.95591	8.23668	10.88	2.34776	0.101205	0.203412
2000	1399	99.7975	55.4373	0.132268	17.9964	0.699062	0.0100203	3.95584	8.23668	10.88	2.34775	0.101205	0.203412
2000	1398	99.7975	55.4373	0.132268	17.9964	0.699143	0.0100203	3.95576	8.23668	10.88	2.34775	0.101205	0.203412
2000	1397	99.7975	55.4373	0.132268	17.9964	0.699226	0.0100203	3.95569	8.23668	10.88	2.34775	0.101205	0.203412
2000	1396	99.7975	55.4373	0.132268	17.9964	0.699309	0.0100203	3.95561	8.23668	10.88	2.34775	0.101205	0.203412
2000	1395	99.7975	55.4373	0.132268	17.9964	0.699394	0.0100203	3.95553	8.23668	10.88	2.34775	0.101205	0.203412
2000	1394	99.7975	55.4373	0.132268	17.9964	0.699479	0.0100203	3.95546	8.23668	10.88	2.34775	0.101205	0.203412
2000	1393	99.7975	55.4373	0.132268	17.9964	0.699565	0.0100203	3.95538	8.23668	10.88	2.34775	0.101205	0.203412
2000	1392	99.7975	55.4372	0.132268	17.9964	0.699652	0.0100203	3.9553	8.23668	10.88	2.34775	0.101205	0.203412
2000	1391	99.7975	55.4372	0.132268	17.9964	0.699739	0.0100203	3.95522	8.23668	10.88	2.34775	0.101205	0.203412
2000	1390	99.7975	55.4372	0.132268	17.9964	0.699828	0.0100203	3.95514	8.23668	10.88	2.34775	0.101205	0.203412
2000	1389	99.7976	55.4372	0.132268	17.9964	0.699917	0.0100203	3.95506	8.23668	10.88	2.34775	0.101205	0.203412
2000	1388	99.7976	55.4372	0.132268	17.9964	0.700007	0.0100203	3.95498	8.23667	10.88	2.34775	0.101205	0.203412
2000	1387	99.7976	55.4372	0.132268	17.9964	0.700098	0.0100203	3.9549	8.23667	10.88	2.34775	0.101205	0.203412
2000	1386	99.7976	55.4372	0.132268	17.9964	0.70019	0.0100203	3.95481	8.23667	10.88	2.34775	0.101205	0.203412
2000	1385	99.7976	55.4372	0.132268	17.9964	0.700283	0.0100203	3.95473	8.23667	10.88	2.34775	0.101205	0.203412
2000	1384	99.7976	55.4372	0.132268	17.9964	0.700377	0.0100203	3.95465	8.23667	10.88	2.34775	0.101205	0.203412
2000	1383	99.7976	55.4372	0.132268	17.9964	0.700471	0.0100203	3.95456	8.23667	10.88	2.34775	0.101205	0.203412
2000	1382	99.7976	55.4372	0.132268	17.9964	0.700566	0.0100203	3.95447	8.23667	10.88	2.34775	0.101205	0.203412
2000	1381	99.7976	55.4372	0.132268	17.9964	0.700663	0.0100203	3.95439	8.23667	10.88	2.34775	0.101205	0.203412
2000	1380	99.7976	55.4372	0.132268	17.9964	0.70076	0.0100203	3.9543	8.23667	10.88	2.34775	0.101205	0.203412
2000	1379	99.7976	55.4372	0.132268	17.9964	0.700858	0.0100203	3.95421	8.23667	10.88	2.34775	0.101205	0.203412
2000	1378	99.7977	55.4372	0.132268	17.9964	0.700957	0.0100203	3.95412	8.23667	10.88	2.34775	0.101205	0.203412
2000	1377	99.7977	55.4372	0.132268	17.9964	0.701056	0.0100203	3.95403	8.23667	10.88	2.34775	0.101205	0.203412
2000	1376	99.7977	55.4372	0.132268	17.9964	0.701157	0.0100203	3.95394	8.23666	10.88	2.34775	0.101205	0.203412
2000	1375	99.7977	55.4372	0.132268	17.9964	0.701258	0.0100203	3.95385	8.23666	10.88	2.34775	0.101205	0.203412
2000	1374	99.7977	55.4372	0.132268	17.9964	0.701361	0.0100203	3.95376	8.23666	10.88	2.34775	0.101205	0.203411
2000	1373	99.7977	55.4371	0.132268	17.9964	0.701464	0.0100203	3.95366	8.23666	10.88	2.34775	0.101205	0.203411
2000	1372	99.7977	55.4371	0.132268	17.9964	0.701568	0.0100203	3.95357	8.23666	10.88	2.34775	0.101205	0.203411
2000	1371	99.7977	55.4371	0.132268	17.9964	0.701673	0.0100203	3.95347	8.23666	10.88	2.34775	0.101205	0.203411
2000	1370	99.7977	55.4371	0.132268	17.9964	0.701779	0.0100203	3.95338	8.23666	10.88	2.34775	0.101205	0.203411
2000	1369	99.7978	55.4371	0.132268	17.9964	0.701886	0.0100203	3.95328	8.23666	10.88	2.34775	0.101205	0.203411
2000	1368	99.7978	55.4371	0.132267	17.9964	0.701994	0.0100203	3.95318	8.23666	10.88	2.34775	0.101205	0.203411
2000	1367	99.7978	55.4371	0.132267	17.9964	0.702102	0.0100203	3.95309	8.23666	10.88	2.34775	0.101205	0.203411
2000	1366	99.7978	55.4371	0.132267	17.9964	0.702212	0.0100203	3.95299	8.23666	10.88	2.34775	0.101205	0.203411
2000	1365	99.7978	55.4371	0.132267	17.9964	0.702322	0.0100203	3.95289	8.23666	10.88	2.34775	0.101205	0.203411
2000	1364	99.7978	55.4371	0.132267	17.9964	0.702434	0.0100203	3.95279	8.23665	10.88	2.34775	0.101205	0.203411
2000	1363	99.7978	55.4371	0.132267	17.9964	0.702546	0.0100203	3.95268	8.23665	10.88	2.34775	0.101205	0.203411
2000	1362	99.7978	55.4371	0.132267	17.9964	0.702659	0.0100203	3.95258	8.23665	10.88	2.34775	0.101205	0.203411
2000	1361	99.7978	55.4371	0.132267	17.9964	0.702773	0.0100203	3.95248	8.23665	10.88	2.34775	0.101205	0.203411
2000	1360	99.7979	55.4371	0.132267	17.9964	0.702888	0.0100203	3.95237	8.23665	10.88	2.34775	0.101205	0.203411
2000	1359	99.7979	55.4371	0.132267	17.9964	0.703004	0.0100203	3.95227	8.23665	10.88	2.34775	0.101205	0.203411
2000	1358	99.7979	55.4371	0.132267	17.9964	0.703121	0.0100203	3.95216	8.23665	10.88	2.34775	0.101205	0.203411
2000	1357	99.7979	55.437	0.132267	17.9964	0.703239	0.0100203	3.95206	8.23665	10.88	2.34775	0.101205	0.203411
2000	1356	99.7979	55.437	0.132267	17.9964	0.703358	0.0100203	3.95195	8.23665	10.88	2.34774	0.101205	0.203411
2000	1355	99.7979	55.437	0.132267	17.9964	0.703477	0.0100202	3.95184	8.23665	10.88	2.34774	0.101205	0.203411
2000	1354	99.7979	55.437	0.132267	17.9964	0.703598	0.0100202	3.95173	8.23664	10.88	2.34774	0.101205	0.203411
2000	1353	99.7979	55.437	0.132267	17.9964	0.703719	0.0100202	3.95162	8.23664	10.88	2.34774	0.101205	0.203411
2000	1352	99.7979	55.437	0.132267	17.9964	0.703842	0.0100202	3.95151	8.23664	10.88	2.34774	0.101204	0.203411
2000	1351	99.798	55.437	0.132267	17.9964	0.703965	0.0100202	3.9514	8.23664	10.88	2.34774	0.101204	0.203411
2000	1350	99.798	55.437	0.132267	17.9964	0.704089	0.0100202	3.95129	8.23664	10.88	2.34774	0.101204	0.203411
2000	1349	99.798	55.437	0.132267	17.9964	0.704215	0.0100202	3.95117	8.23664	10.88	2.34774	0.101204	0.203411
2000	1348	99.798	55.437	0.132267	17.9964	0.704341	0.0100202	3.95106	8.23664	10.88	2.34774	0.101204	0.203411
2000	1347	99.798	55.437	0.132267	17.9963	0.704468	0.0100202	3.95095	8.23664	10.88	2.34774	0.101204	0.203411
2000	1346	99.798	55.437	0.132267	17.9963	0.704596	0.0100202	3.95083	8.23664	10.88	2.34774	0.101204	0.203411
2000	1345	99.798	55.437	0.132267	17.9963	0.704725	0.0100202	3.95071	8.23664	10.88	2.34774	0.101204	0.203411
2000	1344	99.798	55.437	0.132267	17.9963	0.704855	0.0100202	3.9506	8.23663	10.88	2.34774	0.101204	0.203411
2000	1343	99.7981	55.4369	0.132267	17.9963	0.704986	0.0100202	3.95048	8.23663	10.88	2.34774	0.101204	0.203411
2000	1342	99.7981	55.4369	0.132267	17.9963	0.705118	0.0100202	3.95036	8.23663	10.88	2.34774	0.101204	0.203411
2000	1341	99.7981	55.4369	0.132267	17.9963	0.705251	0.0100202	3.95024	8.23663	10.88	2.34774	0.101204	0.203411
2000	1340	99.7981	55.4369	0.132267	17.9963	0.705385	0.0100202	3.95012	8.23663	10.88	2.34774	0.101204	0.203411
2000	1339	99.7981	55.4369	0.132267	17.9963	0.70552	0.0100202	3.94999	8.23663	10.88	2.34774	0.101204	0.203411
2000	1338	99.7981	55.4369	0.132267	17.9963	0.705656	0.0100202	3.94987	8.23663	10.88	2.34774	0.101204	0.203411
2000	1337	99.7981	55.4369	0.132267	17.9963	0.705793	0.0100202	3.94975	8.23663	10.88	2.34774	0.101204	0.203411
2000	1336	99.7982	55.4369	0.132267	17.9963	0.705931	0.0100202	3.94962	8.23663	10.88	2.34774	0.101204	0.203411
2000	1335	99.7982	55.4369	0.132267	17.9963	0.70607	0.0100202	3.9495	8.23662	10.88	2.34774	0.101204	0.203411
2000	1334	99.7982	55.4369	0.132267	17.9963	0.706209	0.0100202	3.94937	8.23662	10.88	2.34774	0.101204	0.203411
2000	1333	99.7982	55.4369	0.132267	17.9963	0.70635	0.0100202	3.94924	8.23662	10.88	2.34774	0.101204	0.20341
2000	1332	99.7982	55.4369	0.132267	17.9963	0.706492	0.0100202	3.94912	8.23662	10.88	2.34774	0.101204	0.20341
2000	1331	99.7982	55.4369	0.132267	17.9963	0.706635	0.0100202	3.94899	8.23662	10.88	2.34774	0.101204	0.20341
2000	1330	99.7982	55.4368	0.132267	17.9963	0.706778	0.0100202	3.94886	8.23662	10.88	2.34774	0.101204	0.20341
2000	1329	99.7983	55.4368	0.132267	17.9963	0.706923	0.0100202	3.94873	8.23662	10.8799	2.34774	0.101204	0.20341
2000	1328	99.7983	55.4368	0.132267	17.9963	0.707069	0.0100202	3.94859	8.23662	10.8799	2.34774	0.101204	0.20341
2000	1327	99.7983	55.4368	0.132267	17.9963	0.707216	0.0100202	3.94846	8.23661	10.8799	2.34774	0.101204	0.20341
2000	1326	99.7983	55.4368	0.132267	17.9963	0.707364	0.0100202	3.94833	8.23661	10.8799	2.34774	0.101204	0.20341
2000	1325	99.7983	55.4368	0.132267	17.9963	0.707512	0.0100202	3.94819	8.23661	10.8799	2.34773	0.101204	0.20341
2000	1324	99.7983	55.4368	0.132267	17.9963	0.707662	0.0100202	3.94806	8.23661	10.8799	2.34773	0.101204	0.20341
2000	1323	99.7983	55.4368	0.132267	17.9963	0.707813	0.0100202	3.94792	8.23661	10.8799	2.34773	0.101204	0.20341
2000	1322	99.7984	55.4368	0.132267	17.9963	0.707965	0.0100202	3.94778	8.23661	10.8799	2.34773	0.101204	0.20341
2000	1321	99.7984	55.4368	0.132267	17.9963	0.708118	0.0100202	3.94764	8.23661	10.8799	2.34773	0.101204	0.20341
2000	1320	99.7984	55.4368	0.132267	17.9963	0.708272	0.0100202	3.94751	8.23661	10.8799	2.34773	0.101204	0.20341
2000	1319	99.7984	55.4368	0.132267	17.9963	0.708427	0.0100202	3.94737	8.2366	10.8799	2.34773	0.101204	0.20341
2000	1318	99.7984	55.4367	0.132267	17.9963	0.708583	0.0100202	3.94722	8.2366	10.8799	2.34773	0.101204	0.20341
2000	1317	99.7984	55.4367	0.132267	17.9963	0.70874	0.0100202	3.94708	8.2366	10.8799	2.34773	0.101204	0.20341
2000	1316	99.7985	55.4367	0.132267	17.9963	0.708898	0.0100202	3.94694	8.2366	10.8799	2.34773	0.101204	0.20341
2000	1315	99.7985	55.4367	0.132267	17.9963	0.709057	0.0100202	3.9468	8.2366	10.8799	2.34773	0.101204	0.20341
2000	1314	99.7985	55.4367	0.132267	17.9963	0.709217	0.0100202	3.94665	8.2366	10.8799	2.34773	0.101204	0.20341
2000	1313	99.7985	55.4367	0.132267	17.9963	0.709378	0.0100202	3.9465	8.2366	10.8799	2.34773	0.101204	0.20341
2000	1312	99.7985	55.4367	0.132266	17.9963	0.70954	0.0100202	3.94636	8.2366	10.8799	2.34773	0.101204	0.20341
2000	1311	99.7985	55.4367	0.132266	17.9963	0.709704	0.0100202	3.94621	8.23659	10.8799	2.34773	0.101204	0.20341
2000	1310	99.7986	55.4367	0.132266	17.9963	0.709868	0.0100202	3.94606	8.23659	10.8799	2.34773	0.101204	0.20341
2000	1309	99.7986	55.4367	0.132266	17.9962	0.710033	0.0100202	3.94591	8.23659	10.8799	2.34773	0.101204	0.20341
2000	1308	99.7986	55.4367	0.132266	17.9962	0.7102	0.0100202	3.94576	8.23659	10.8799	2.34773	0.101204	0.20341
2000	1307	99.7986	55.4366	0.132266	17.9962	0.710367	0.0100202	3.94561	8.23659	10.8799	2.34773	0.101204	0.20341
2000	1306	99.7986	55.4366	0.132266	17.9962	0.710536	0.0100202	3.94546	8.23659	10.8799	2.34773	0.101204	0.20341
2000	1305	99.7986	55.4366	0.132266	17.9962	0.710706	0.0100202	3.9453	8.23659	10.8799	2.34773	0.101204	0.20341
2000	1304	99.7987	55.4366	0.132266	17.9962	0.710876	0.0100202	3.94515	8.23658	10.8799	2.34773	0.101204	0.20341
2000	1303	99.7987	55.4366	0.132266	17.9962	0.711048	0.0100202	3.94499	8.23658	10.8799	2.34773	0.101204	0.20341
2000	1302	99.7987	55.4366	0.132266	17.9962	0.711221	0.0100202	3.94484	8.23658	10.8799	2.34773	0.101204	0.203409
2000	1301	99.7987	55.4366	0.132266	17.9962	0.711395	0.0100202	3.94468	8.23658	10.8799	2.34773	0.101204	0.203409
2000	1300	99.7987	55.4366	0.132266	17.9962	0.71157	0.0100202	3.94452	8.23658	10.8799	2.34773	0.101204	0.203409
2000	1299	99.7987	55.4366	0.132266	17.9962	0.711746	0.0100202	3.94436	8.23658	10.8799	2.34773	0.101204	0.203409
2000	1298	99.7988	55.4366	0.132266	17.9962	0.711924	0.0100202	3.9442	8.23658	10.8799	2.34772	0.101204	0.203409
2000	1297	99.7988	55.4366	0.132266	17.9962	0.712102	0.0100202	3.94404	8.23657	10.8799	2.34772	0.101204	0.203409
2000	1296	99.7988	55.4365	0.132266	17.9962	0.712282	0.0100202	3.94388	8.23657	10.8799	2.34772	0.101204	0.203409
2000	1295	99.7988	55.4365	0.132266	17.9962	0.712462	0.0100202	3.94372	8.23657	10.8799	2.34772	0.101204	0.203409
2000	1294	99.7988	55.4365	0.132266	17.9962	0.712644	0.0100202	3.94355	8.23657	10.8799	2.34772	0.101204	0.203409
2000	1293	99.7988	55.4365	0.132266	17.9962	0.712827	0.0100202	3.94339	8.23657	10.8799	2.34772	0.101204	0.203409
2000	1292	99.7989	55.4365	0.132266	17.9962	0.71301	0.0100202	3.94322	8.23657	10.8799	2.34772	0.101204	0.203409
2000	1291	99.7989	55.4365	0.132266	17.9962	0.713196	0.0100202	3.94305	8.23657	10.8799	2.34772	0.101204	0.203409
2000	1290	99.7989	55.4365	0.132266	17.9962	0.713382	0.0100202	3.94288	8.23656	10.8799	2.34772	0.101204	0.203409
2000	1289	99.7989	55.4365	0.132266	17.9962	0.713569	0.0100201	3.94271	8.23656	10.8799	2.34772	0.101204	0.203409
2000	1288	99.7989	55.4365	0.132266	17.9962	0.713757	0.0100201	3.94254	8.23656	10.8799	2.34772	0.101203	0.203409
2000	1287	99.799	55.4365	0.132266	17.9962	0.713947	0.0100201	3.94237	8.23656	10.8799	2.34772	0.101203	0.203409
2000	1286	99.799	55.4364	0.132266	17.9962	0.714137	0.0100201	3.9422	8.23656	10.8799	2.34772	0.101203	0.203409
2000	1285	99.799	55.4364	0.132266	17.9962	0.714329	0.0100201	3.94203	8.23656	10.8799	2.34772	0.101203	0.203409
2000	1284	99.799	55.4364	0.132266	17.9962	0.714522	0.0100201	3.94185	8.23655	10.8799	2.34772	0.101203	0.203409
2000	1283	99.799	55.4364	0.132266	17.9962	0.714716	0.0100201	3.94168	8.23655	10.8799	2.34772	0.101203	0.203409
2000	1282	99.7991	55.4364	0.132266	17.9962	0.714912	0.0100201	3.9415	8.23655	10.8799	2.34772	0.101203	0.203409
2000	1281	99.7991	55.4364	0.132266	17.9962	0.715108	0.0100201	3.94132	8.23655	10.8799	2.34772	0.101203	0.203409
2000	1280	99.7991	55.4364	0.132266	17.9962	0.715305	0.0100201	3.94114	8.23655	10.8799	2.34772	0.101203	0.203409
2000	1279	99.7991	55.4364	0.132266	17.9962	0.715504	0.0100201	3.94096	8.23655	10.8799	2.34772	0.101203	0.203409
2000	1278	99.7991	55.4364	0.132266	17.9961	0.715704	0.0100201	3.94078	8.23654	10.8799	2.34772	0.101203	0.203409
2000	1277	99.7992	55.4363	0.132266	17.9961	0.715905	0.0100201	3.9406	8.23654	10.8799	2.34772	0.101203	0.203409
2000	1276	99.7992	55.4363	0.132266	17.9961	0.716107	0.0100201	3.94042	8.23654	10.8798	2.34771	0.101203	0.203408
2000	1275	99.7992	55.4363	0.132266	17.9961	0.716311	0.0100201	3.94024	8.23654	10.8798	2.34771	0.101203	0.203408
2000	1274	99.7992	55.4363	0.132266	17.9961	0.716515	0.0100201	3.94005	8.23654	10.8798	2.34771	0.101203	0.203408
2000	1273	99.7992	55.4363	0.132266	17.9961	0.716721	0.0100201	3.93986	8.23654	10.8798	2.34771	0.101203	0.203408
2000	1272	99.7993	55.4363	0.132266	17.9961	0.716928	0.0100201	3.93968	8.23653	10.8798	2.34771	0.101203	0.203408
2000	1271	99.7993	55.4363	0.132265	17.9961	0.717136	0.0100201	3.93949	8.23653	10.8798	2.34771	0.101203	0.203408
2000	1270	99.7993	55.4363	0.132265	17.9961	0.717345	0.0100201	3.9393	8.23653	10.8798	2.34771	0.101203	0.203408
2000	1269	99.7993	55.4363	0.132265	17.9961	0.717555	0.0100201	3.93911	8.23653	10.8798	2.34771	0.101203	0.203408
2000	1268	99.7993	55.4362	0.132265	17.9961	0.717767	0.0100201	3.93892	8.23653	10.8798	2.34771	0.101203	0.203408
2000	1267	99.7994	55.4362	0.132265	17.9961	0.71798	0.0100201	3.93873	8.23653	10.8798	2.34771	0.101203	0.203408
2000	1266	99.7994	55.4362	0.132265	17.9961	0.718194	0.0100201	3.93853	8.23652	10.8798	2.34771	0.101203	0.203408
2000	1265	99.7994	55.4362	0.132265	17.9961	0.718409	0.0100201	3.93834	8.23652	10.8798	2.34771	0.101203	0.203408
2000	1264	99.7994	55.4362	0.132265	17.9961	0.718626	0.0100201	3.93814	8.23652	10.8798	2.34771	0.101203	0.203408
2000	1263	99.7994	55.4362	0.132265	17.9961	0.718843	0.0100201	3.93794	8.23652	10.8798	2.34771	0.101203	0.203408
2000	1262	99.7995	55.4362	0.132265	17.9961	0.719062	0.0100201	3.93775	8.23652	10.8798	2.34771	0.101203	0.203408
2000	1261	99.7995	55.4362	0.132265	17.9961	0.719283	0.0100201	3.93755	8.23652	10.8798	2.34771	0.101203	0.203408
2000	1260	99.7995	55.4361	0.132265	17.9961	0.719504	0.0100201	3.93735	8.23651	10.8798	2.34771	0.101203	0.203408
2000	1259	99.7995	55.4361	0.132265	17.9961	0.719726	0.0100201	3.93715	8.23651	10.8798	2.34771	0.101203	0.203408
2000	1258	99.7996	55.4361	0.132265	17.9961	0.71995	0.0100201	3.93694	8.23651	10.8798	2.34771	0.101203	0.203408
2000	1257	99.7996	55.4361	0.132265	17.9961	0.720175	0.0100201	3.93674	8.23651	10.8798	2.34771	0.101203	0.203408
2000	1256	99.7996	55.4361	0.132265	17.9961	0.720402	0.0100201	3.93654	8.23651	10.8798	2.3477	0.101203	0.203408
2000	1255	99.7996	55.4361	0.132265	17.9961	0.720629	0.0100201	3.93633	8.2365	10.8798	2.3477	0.101203	0.203408
2000	1254	99.7996	55.4361	0.132265	17.9961	0.720858	0.0100201	3.93612	8.2365	10.8798	2.3477	0.101203	0.203408
2000	1253	99.7997	55.4361	0.132265	17.9961	0.721088	0.0100201	3.93591	8.2365	10.8798	2.3477	0.101203	0.203407
2000	1252	99.7997	55.436	0.132265	17.996	0.721319	0.0100201	3.93571	8.2365	10.8798	2.3477	0.101203	0.203407
2000	1251	99.7997	55.436	0.132265	17.996	0.721552	0.0100201	3.93549	8.2365	10.8798	2.3477	0.101203	0.203407
2000	1250	99.7997	55.436	0.132265	17.996	0.721786	0.0100201	3.93528	8.23649	10.8798	2.3477	0.101203	0.203407
2000	1249	99.7998	55.436	0.132265	17.996	0.722021	0.0100201	3.93507	8.23649	10.8798	2.3477	0.101203	0.203407
2000	1248	99.7998	55.436	0.132265	17.996	0.722257	0.0100201	3.93486	8.23649	10.8798	2.3477	0.101203	0.203407
2000	1247	99.7998	55.436	0.132265	17.996	0.722495	0.0100201	3.93464	8.23649	10.8798	2.3477	0.101203	0.203407
2000	1246	99.7998	55.436	0.132265	17.996	0.722734	0.0100201	3.93443	8.23649	10.8798	2.3477	0.101203	0.203407
2000	1245	99.7999	55.4359	0.132265	17.996	0.722974	0.0100201	3.93421	8.23648	10.8798	2.3477	0.101203	0.203407
2000	1244	99.7999	55.4359	0.132265	17.996	0.723216	0.0100201	3.93399	8.23648	10.8798	2.3477	0.101203	0.203407
2000	1243	99.7999	55.4359	0.132265	17.996	0.723459	0.01002	3.93377	8.23648	10.8798	2.3477	0.101202	0.203407
2000	1242	99.7999	55.4359	0.132265	17.996	0.723703	0.01002	3.93355	8.23648	10.8798	2.3477	0.101202	0.203407
2000	1241	99.8	55.4359	0.132265	17.996	0.723948	0.01002	3.93333	8.23648	10.8798	2.3477	0.101202	0.203407
2000	1240	99.8	55.4359	0.132265	17.996	0.724195	0.01002	3.9331	8.23647	10.8798	2.3477	0.101202	0.203407
2000	1239	99.8	55.4359	0.132265	17.996	0.724443	0.01002	3.93288	8.23647	10.8798	2.3477	0.101202	0.203407
2000	1238	99.8	55.4359	0.132264	17.996	0.724692	0.01002	3.93265	8.23647	10.8798	2.34769	0.101202	0.203407
2000	1237	99.8001	55.4358	0.132264	17.996	0.724943	0.01002	3.93243	8.23647	10.8798	2.34769	0.101202	0.203407
2000	1236	99.8001	55.4358	0.132264	17.996	0.725195	0.01002	3.9322	8.23647	10.8798	2.34769	0.101202	0.203407
2000	1235	99.8001	55.4358	0.132264	17.996	0.725448	0.01002	3.93197	8.23646	10.8797	2.34769	0.101202	0.203407
2000	1234	99.8001	55.4358	0.132264	17.996	0.725703	0.01002	3.93174	8.23646	10.8797	2.34769	0.101202	0.203407
2000	1233	99.8002	55.4358	0.132264	17.996	0.725959	0.01002	3.93151	8.23646	10.8797	2.34769	0.101202	0.203406
2000	1232	99.5469	55.4349	0.132571	18.0352	0.725483	0.0100455	3.92394	8.17602	10.9029	2.35362	0.10146	0.203924
2000	1231	99.4001	55.4344	0.13275	18.058	0.725308	0.0100604	3.9194	8.14087	10.9163	2.35707	0.10161	0.204225
2000	1230	99.2539	55.4339	0.132928	18.0808	0.725129	0.0100752	3.91484	8.10581	10.9297	2.36051	0.101759	0.204526
2000	1229	97.7325	55.4999	0.134931	18.0231	0.730325	0.010232	3.93618	8.04857	10.9329	2.37298	0.103236	0.20771
2000	1228	95.6492	55.5961	0.137781	17.9285	0.737954	0.0104549	3.9691	7.98166	10.9315	2.38934	0.105325	0.212234
2000	1227	93.6611	55.6915	0.140618	17.8349	0.745482	0.0106768	4.00137	7.91562	10.9303	2.40536	0.107402	0.216739
2000	1226	91.7619	55.7859	0.143444	17.7423	0.752913	0.0108978	4.03303	7.8504	10.9294	2.42104	0.109466	0.221225
2000	1225	89.9455	55.8795	0.146258	17.6506	0.760248	0.0111178	4.06407	7.78598	10.9287	2.4364	0.111518	0.225692
2000	1224	88.2067	55.9722	0.149061	17.5598	0.76749	0.011337	4.09452	7.72234	10.9282	2.45146	0.113558	0.230141
2000	1223	86.5404	56.0641	0.151852	17.4698	0.774641	0.0115553	4.1244	7.65944	10.9278	2.46621	0.115586	0.234573
2000	1222	84.9422	56.1552	0.154632	17.3808	0.781704	0.0117727	4.15371	7.59728	10.9277	2.48068	0.117602	0.238986
2000	1221	83.4079	56.2455	0.157401	17.2926	0.78868	0.0119893	4.18248	7.53582	10.9278	2.49488	0.119607	0.243382
2000	1220	81.9337	56.335	0.160159	17.2052	0.795572	0.012205	4.21071	7.47504	10.928	2.50881	0.121601	0.247761
2000	1219	80.5161	56.4238	0.162907	17.1186	0.802382	0.0124199	4.23842	7.41493	10.9284	2.52248	0.123584	0.252123
2000	1218	79.1518	56.5119	0.165645	17.0328	0.809111	0.0126339	4.26562	7.35546	10.9289	2.53591	0.125556	0.256469
2000	1217	77.8378	56.5993	0.168373	16.9478	0.815762	0.0128472	4.29232	7.29662	10.9296	2.5491	0.127518	0.260799
2000	1216	76.5713	56.6861	0.17109	16.8635	0.822335	0.0130597	4.31854	7.23839	10.9304	2.56205	0.129469	0.265112
2000	1215	75.3498	56.7722	0.173798	16.78	0.828832	0.0132714	4.34428	7.18074	10.9313	2.57479	0.13141	0.26941
2000	1214	74.1708	56.8576	0.176497	16.6972	0.835256	0.0134824	4.36956	7.12367	10.9324	2.5873	0.133341	0.273693
2000	1213	73.0321	56.9424	0.179186	16.6152	0.841607	0.0136926	4.39438	7.06716	10.9335	2.59962	0.135263	0.27796
2000	1212	71.9316	57.0267	0.181866	16.5338	0.847887	0.0139021	4.41875	7.0112	10.9348	2.61172	0.137175	0.282212
2000	1211	70.8675	57.1103	0.184537	16.4531	0.854097	0.0141108	4.44269	6.95576	10.9362	2.62364	0.139078	0.28645
2000	1210	69.8378	57.1934	0.187199	16.3731	0.860239	0.0143189	4.46621	6.90084	10.9377	2.63536	0.140971	0.290674
2000	1209	68.3839	57.3156	0.190801	16.367	0.864356	0.0146233	4.49465	6.80892	10.8411	2.66238	0.143805	0.296853
2000	1208	67.171	57.4209	0.194	16.3313	0.86916	0.0148874	4.52042	6.73343	10.7847	2.68271	0.146242	0.302214
2000	1207	66.0057	57.5255	0.197182	16.2956	0.873874	0.0151502	4.54569	6.65907	10.729	2.70268	0.148663	0.307549
2000	1206	64.885	57.6294	0.200345	16.26	0.878499	0.0154119	4.57047	6.58579	10.6739	2.7223	0.151071	0.312861
2000	1205	63.8063	57.7325	0.203491	16.2245	0.883039	0.0156724	4.59477	6.51357	10.6193	2.74156	0.153465	0.31815
2000	1204	62.7674	57.8349	0.20662	16.1889	0.887497	0.0159318	4.61861	6.44239	10.5653	2.76049	0.155846	0.323416
2000	1203	61.766	57.9367	0.209732	16.1534	0.891874	0.0161901	4.64199	6.37222	10.5119	2.77909	0.158213	0.32866
2000	1202	60.8	58.0377	0.212827	16.118	0.896173	0.0164474	4.66495	6.30304	10.4591	2.79737	0.160567	0.333881
2000	1201	59.8677	58.1381	0.215907	16.0825	0.900397	0.0167035	4.68747	6.23482	10.4068	2.81533	0.162909	0.339081
2000	1200	58.9672	58.2378	0.21897	16.0471	0.904547	0.0169586	4.70958	6.16755	10.355	2.83298	0.165237	0.344259
2000	1199	58.097	58.3369	0.222018	16.0117	0.908626	0.0172126	4.73129	6.1012	10.3037	2.85034	0.167554	0.349416
2000	1198	57.2554	58.4354	0.22505	15.9764	0.912635	0.0174656	4.75259	6.03575	10.2529	2.8674	0.169858	0.354552
2000	1197	56.4228	58.5369	0.228135	15.9416	0.915822	0.0177233	4.76904	5.97119	10.2028	2.88476	0.172204	0.359784
2000	1196	55.6066	58.6391	0.231254	15.9048	0.918986	0.0179835	4.78474	5.90597	10.1557	2.90191	0.174567	0.365065
2000	1195	54.8169	58.7406	0.234357	15.868	0.922094	0.0182426	4.80012	5.84165	10.1089	2.91876	0.176918	0.370324
2000	1194	54.0525	58.8414	0.237445	15.8313	0.925149	0.0185005	4.81519	5.77821	10.0626	2.93533	0.179257	0.375561
2000	1193	53.3122	58.9416	0.240516	15.7946	0.928151	0.0187574	4.82997	5.71563	10.0168	2.95163	0.181582	0.380776
2000	1192	52.5949	59.0411	0.243572	15.758	0.931103	0.0190133	4.84446	5.65389	9.97135	2.96764	0.183896	0.385969
2000	1191	51.8994	59.14	0.246612	15.7214	0.934005	0.019268	4.85866	5.59298	9.92633	2.98339	0.186197	0.391141
2000	1190	51.2248	59.2384	0.249637	15.6848	0.936859	0.0195218	4.87259	5.53288	9.88172	2.99888	0.188486	0.396293
2000	1189	50.5701	59.3361	0.252648	15.6482	0.939667	0.0197745	4.88625	5.47357	9.83751	3.0141	0.190763	0.401423
2000	1188	49.9344	59.4332	0.255643	15.6117	0.94243	0.0200263	4.89965	5.41503	9.79369	3.02908	0.193029	0.406533
2000	1187	49.3169	59.5298	0.258625	15.5752	0.945149	0.020277	4.91279	5.35726	9.75026	3.04381	0.195283	0.411623
2000	1186	48.7169	59.6257	0.261592	15.5387	0.947824	0.0205268	4.92568	5.30023	9.70721	3.05829	0.197526	0.416693
2000	1185	48.1335	59.7211	0.264545	15.5023	0.950458	0.0207756	4.93834	5.24393	9.66452	3.07254	0.199758	0.421744
2000	1184	47.5661	59.816	0.267484	15.4658	0.953052	0.0210234	4.95075	5.18835	9.62221	3.08655	0.201978	0.426775
2000	1183	47.0139	59.9103	0.27041	15.4295	0.955605	0.0212703	4.96294	5.13347	9.58025	3.10033	0.204188	0.431787
2000	1182	46.4765	60.0041	0.273322	15.3931	0.95812	0.0215162	4.9749	5.07928	9.53865	3.11389	0.206387	0.43678
2000	1181	45.9532	60.0973	0.276221	15.3568	0.960598	0.0217613	4.98663	5.02576	9.49739	3.12722	0.208575	0.441754
2000	1180	45.4433	60.19	0.279107	15.3205	0.963038	0.0220054	4.99816	4.97291	9.45648	3.14034	0.210753	0.44671
2000	1179	44.9465	60.2822	0.28198	15.2842	0.965443	0.0222487	5.00947	4.9207	9.4159	3.15325	0.21292	0.451648
2000	1178	44.4622	60.3739	0.28484	15.248	0.967813	0.022491	5.02057	4.86914	9.37565	3.16595	0.215078	0.456567
2000	1177	43.9899	60.4651	0.287688	15.2118	0.970149	0.0227325	5.03148	4.8182	9.33573	3.17844	0.217225	0.461469
2000	1176	43.5292	60.5558	0.290524	15.1757	0.972451	0.0229731	5.04219	4.76788	9.29612	3.19073	0.219362	0.466354
2000	1175	43.0796	60.646	0.293347	15.1395	0.974721	0.0232129	5.0527	4.71816	9.25683	3.20282	0.22149	0.471221
2000	1174	42.6407	60.7357	0.296158	15.1034	0.976959	0.0234518	5.06302	4.66904	9.21786	3.21471	0.223607	0.476071
2000	1173	42.2121	60.8249	0.298958	15.0674	0.979167	0.0236899	5.07316	4.6205	9.17918	3.22641	0.225716	0.480904
2000	1172	41.7936	60.9137	0.301745	15.0313	0.981343	0.0239271	5.08312	4.57253	9.14081	3.23793	0.227814	0.485721
2000	1171	41.3846	61.002	0.304522	14.9953	0.98349	0.0241636	5.0929	4.52513	9.10273	3.24926	0.229904	0.490521
2000	1170	40.9849	61.0899	0.307287	14.9594	0.985608	0.0243992	5.10251	4.47827	9.06495	3.2604	0.231984	0.495305
2000	1169	40.5941	61.1773	0.31004	14.9234	0.987698	0.0246341	5.11194	4.43196	9.02745	3.27137	0.234055	0.500072
2000	1168	40.212	61.2643	0.312783	14.8876	0.98976	0.0248682	5.12121	4.38619	8.99023	3.28216	0.236117	0.504824
2000	1167	39.8383	61.3508	0.315514	14.8517	0.991794	0.0251015	5.13031	4.34094	8.9533	3.29277	0.238171	0.50956
2000	1166	39.4726	61.437	0.318235	14.8159	0.993802	0.025334	5.13925	4.29621	8.91664	3.30322	0.240215	0.51428
2000	1165	39.1148	61.5226	0.320945	14.7801	0.995784	0.0255658	5.14803	4.25198	8.88025	3.31349	0.242251	0.518986
2000	1164	38.7645	61.6079	0.323644	14.7443	0.997741	0.0257968	5.15666	4.20826	8.84413	3.3236	0.244278	0.523676
2000	1163	38.4215	61.6927	0.326333	14.7086	0.999672	0.0260271	5.16513	4.16503	8.80827	3.33355	0.246297	0.528351
2000	1162	38.0855	61.7772	0.329012	14.6729	1.00158	0.0262567	5.17346	4.12228	8.77267	3.34333	0.248307	0.533011
2000	1161	37.7565	61.8612	0.331681	14.6373	1.00346	0.0264855	5.18163	4.08	8.73733	3.35296	0.250309	0.537656
2000	1160	37.434	61.9448	0.334339	14.6017	1.00532	0.0267137	5.18966	4.0382	8.70224	3.36243	0.252303	0.542287
2000	1159	37.118	62.0281	0.336988	14.5661	1.00716	0.0269411	5.19755	3.99685	8.6674	3.37175	0.254289	0.546904
2000	1158	36.8082	62.1109	0.339626	14.5305	1.00897	0.0271678	5.2053	3.95596	8.63281	3.38091	0.256267	0.551507
2000	1157	36.5045	62.1934	0.342255	14.495	1.01076	0.0273939	5.21291	3.91551	8.59846	3.38993	0.258237	0.556096
2000	1156	36.2067	62.2755	0.344875	14.4596	1.01253	0.0276192	5.22038	3.8755	8.56435	3.3988	0.260199	0.56067
2000	1155	35.9145	62.3572	0.347485	14.4242	1.01428	0.0278439	5.22772	3.83593	8.53048	3.40752	0.262153	0.565232
2000	1154	35.6278	62.4386	0.350086	14.3888	1.01601	0.0280679	5.23493	3.79678	8.49684	3.4161	0.2641	0.569779
2000	1153	35.3465	62.5195	0.352677	14.3534	1.01771	0.0282913	5.24201	3.75805	8.46343	3.42454	0.266039	0.574314
2000	1152	35.0705	62.6001	0.355259	14.3181	1.0194	0.028514	5.24896	3.71973	8.43025	3.43284	0.267971	0.578835
2000	1151	34.7994	62.6804	0.357832	14.2828	1.02106	0.0287361	5.25578	3.68182	8.3973	3.44101	0.269895	0.583343
2000	1150	34.5333	62.7603	0.360397	14.2476	1.02271	0.0289575	5.26248	3.64431	8.36456	3.44904	0.271812	0.587838
2000	1149	34.272	62.8399	0.362952	14.2124	1.02434	0.0291783	5.26906	3.6072	8.33205	3.45693	0.273721	0.59232
2000	1148	34.0153	62.9191	0.365499	14.1772	1.02595	0.0293985	5.27552	3.57047	8.29976	3.4647	0.275624	0.59679
2000	1147	33.7632	62.9979	0.368037	14.1421	1.02754	0.0296181	5.28186	3.53413	8.26768	3.47234	0.277519	0.601247
2000	1146	33.5154	63.0765	0.370566	14.107	1.02911	0.029837	5.28808	3.49816	8.23581	3.47984	0.279408	0.605692
2000	1145	33.2719	63.1547	0.373087	14.072	1.03066	0.0300554	5.29419	3.46257	8.20415	3.48723	0.281289	0.610125
2000	1144	33.0326	63.2325	0.3756	14.037	1.0322	0.0302732	5.30018	3.42734	8.17269	3.49448	0.283164	0.614545
2000	1143	32.7973	63.3101	0.378104	14.002	1.03371	0.0304903	5.30606	3.39247	8.14145	3.50162	0.285032	0.618954
2000	1142	32.566	63.3873	0.3806	13.9671	1.03521	0.0307069	5.31182	3.35797	8.1104	3.50863	0.286893	0.62335
2000	1141	32.3385	63.4642	0.383088	13.9322	1.0367	0.0309229	5.31748	3.32381	8.07955	3.51553	0.288747	0.627735
2000	1140	32.1147	63.5408	0.385568	13.8974	1.03816	0.0311384	5.32303	3.29	8.04891	3.52231	0.290595	0.632109
2000	1139	31.8946	63.6171	0.38804	13.8626	1.03962	0.0313532	5.32847	3.25653	8.01845	3.52897	0.292437	0.63647
2000	1138	31.6781	63.693	0.390505	13.8278	1.04105	0.0315675	5.3338	3.22339	7.98819	3.53551	0.294272	0.640821
2000	1137	31.465	63.7687	0.392961	13.7931	1.04247	0.0317813	5.33903	3.19059	7.95812	3.54195	0.2961	0.64516
2000	1136	31.2554	63.8441	0.39541	13.7584	1.04387	0.0319945	5.34416	3.15812	7.92824	3.54827	0.297922	0.649489
2000	1135	31.049	63.9191	0.397851	13.7238	1.04526	0.0322072	5.34918	3.12597	7.89855	3.55448	0.299738	0.653806
2000	1134	30.8458	63.9939	0.400285	13.6892	1.04663	0.0324193	5.3541	3.09414	7.86904	3.56058	0.301548	0.658112
2000	1133	30.6458	64.0684	0.402711	13.6547	1.04799	0.0326309	5.35892	3.06262	7.83972	3.56657	0.303352	0.662408
2000	1132	30.4488	64.1426	0.405129	13.6202	1.04933	0.032842	5.36365	3.03142	7.81058	3.57246	0.305149	0.666693
2000	1131	30.2548	64.2165	0.407541	13.5857	1.05065	0.0330526	5.36827	3.00052	7.78161	3.57824	0.306941	0.670967
2000	1130	30.0638	64.2901	0.409945	13.5513	1.05197	0.0332626	5.37279	2.96992	7.75282	3.58392	0.308726	0.675231
2000	1129	29.8756	64.3635	0.412342	13.5169	1.05326	0.0334721	5.37722	2.93962	7.72421	3.5895	0.310506	0.679485
2000	1128	29.6902	64.4366	0.414732	13.4825	1.05455	0.0336812	5.38155	2.90961	7.69577	3.59497	0.31228	0.683728
2000	1127	29.5075	64.5094	0.417115	13.4482	1.05582	0.0338897	5.38579	2.8799	7.66751	3.60035	0.314048	0.687961
2000	1126	29.3274	64.5819	0.419491	13.414	1.05707	0.0340978	5.38993	2.85047	7.63941	3.60562	0.31581	0.692185
2000	1125	29.15	64.6542	0.42186	13.3798	1.05832	0.0343053	5.39398	2.82132	7.61148	3.6108	0.317567	0.696398
2000	1124	28.9751	64.7262	0.424222	13.3456	1.05954	0.0345124	5.39794	2.79246	7.58372	3.61588	0.319318	0.700601
2000	1123	28.8027	64.7979	0.426577	13.3115	1.06076	0.034719	5.40181	2.76387	7.55613	3.62087	0.321063	0.704795
2000	1122	28.6327	64.8694	0.428926	13.2774	1.06196	0.0349251	5.40558	2.73555	7.52869	3.62576	0.322803	0.708979
2000	1121	28.4651	64.9406	0.431268	13.2434	1.06315	0.0351307	5.40927	2.7075	7.50142	3.63056	0.324538	0.713154
2000	1120	28.2998	65.0116	0.433603	13.2094	1.06432	0.0353359	5.41286	2.67972	7.47431	3.63527	0.326267	0.717319
2000	1119	28.1368	65.0823	0.435932	13.1754	1.06549	0.0355407	5.41637	2.6522	7.44736	3.63989	0.32799	0.721475
2000	1118	27.976	65.1528	0.438255	13.1415	1.06664	0.0357449	5.41979	2.62493	7.42057	3.64442	0.329709	0.725622
2000	1117	27.8174	65.2231	0.440571	13.1076	1.06777	0.0359487	5.42312	2.59793	7.39393	3.64886	0.331422	0.729759
2000	1116	27.6609	65.2931	0.44288	13.0738	1.0689	0.0361521	5.42636	2.57117	7.36744	3.65321	0.33313	0.733888
2000	1115	27.5065	65.3628	0.445184	13.04	1.07001	0.0363551	5.42952	2.54467	7.34111	3.65748	0.334832	0.738008
2000	1114	27.3541	65.4323	0.447481	13.0063	1.07111	0.0365575	5.43259	2.51841	7.31493	3.66166	0.33653	0.742118
2000	1113	27.2038	65.5016	0.449772	12.9726	1.0722	0.0367596	5.43557	2.4924	7.2889	3.66575	0.338223	0.74622
2000	1112	27.0554	65.5707	0.452057	12.939	1.07327	0.0369612	5.43847	2.46663	7.26302	3.66976	0.33991	0.750313
2000	1111	26.9089	65.6395	0.454336	12.9054	1.07434	0.0371625	5.44128	2.44109	7.23728	3.67369	0.341593	0.754398
2000	1110	26.7643	65.7081	0.456608	12.8718	1.07539	0.0373632	5.44401	2.41579	7.21169	3.67754	0.34327	0.758474
2000	1109	26.6215	65.7764	0.458875	12.8383	1.07643	0.0375636	5.44666	2.39072	7.18625	3.6813	0.344943	0.762541
2000	1108	26.4805	65.8446	0.461136	12.8048	1.07746	0.0377636	5.44922	2.36588	7.16095	3.68499	0.346611	0.766601
2000	1107	26.3413	65.9125	0.463391	12.7714	1.07847	0.0379631	5.4517	2.34127	7.13579	3.6886	0.348274	0.770652
2000	1106	26.2039	65.9802	0.46564	12.738	1.07948	0.0381623	5.4541	2.31688	7.11077	3.69213	0.349932	0.774694
2000	1105	26.0681	66.0477	0.467884	12.7047	1.08047	0.038361	5.45642	2.29272	7.08589	3.69558	0.351586	0.778729
2000	1104	25.934	66.115	0.470122	12.6714	1.08145	0.0385594	5.45865	2.26877	7.06115	3.69895	0.353235	0.782756
2000	1103	25.8015	66.1821	0.472353	12.6381	1.08242	0.0387182	5.46077	2.24503	7.03655	3.70226	0.35488	0.786776
2000	1102	25.67	66.2501	0.474572	12.605	1.08329	0.0383466	5.46234	2.22137	7.01209	3.70556	0.356529	0.790807
2000	1101	25.5401	66.3178	0.476784	12.5719	1.08415	0.0379767	5.46382	2.19793	6.98776	3.70879	0.358173	0.79483
2000	1100	25.4117	66.3854	0.47899	12.5389	1.085	0.0376084	5.46522	2.1747	6.96356	3.71195	0.359812	0.798845
2000	1099	25.2848	66.4528	0.48119	12.5059	1.08583	0.0372418	5.46653	2.15168	6.9395	3.71504	0.361448	0.802853
2000	1098	25.1595	66.5199	0.483385	12.473	1.08666	0.0368768	5.46777	2.12886	6.91556	3.71805	0.363079	0.806854
2000	1097	25.0356	66.5869	0.485574	12.4401	1.08747	0.0365134	5.46892	2.10624	6.89176	3.72099	0.364705	0.810847
2000	1096	24.9131	66.6536	0.487757	12.4072	1.08827	0.0361517	5.46999	2.08383	6.86808	3.72387	0.366327	0.814832
2000	1095	24.7921	66.7202	0.489934	12.3744	1.08906	0.0357916	5.47099	2.06162	6.84454	3.72667	0.367945	0.81881
2000	1094	24.6724	66.7866	0.492106	12.3417	1.08984	0.0354332	5.4719	2.0396	6.82111	3.7294	0.369558	0.822781
2000	1093	24.5541	66.8528	0.494273	12.309	1.09061	0.0350764	5.47273	2.01778	6.79782	3.73207	0.371167	0.826744
2000	1092	24.4372	66.9188	0.496434	12.2763	1.09137	0.0347212	5.47348	1.99615	6.77465	3.73467	0.372772	0.830701
2000	1091	24.3216	66.9846	0.498589	12.2437	1.09212	0.0343677	5.47416	1.97471	6.7516	3.7372	0.374373	0.83465
2000	1090	24.2072	67.0502	0.500739	12.2111	1.09285	0.0340159	5.47475	1.95346	6.72867	3.73967	0.37597	0.838592
2000	1089	24.0942	67.1156	0.502883	12.1786	1.09357	0.0336657	5.47527	1.93239	6.70587	3.74207	0.377563	0.842528
2000	1088	23.9823	67.1809	0.505023	12.1461	1.09429	0.0333172	5.4757	1.91151	6.68319	3.74441	0.379151	0.846456
2000	1087	23.8717	67.246	0.507157	12.1136	1.09499	0.0329703	5.47606	1.89082	6.66062	3.74669	0.380736	0.850378
2000	1086	23.7623	67.3109	0.509285	12.0812	1.09568	0.032625	5.47633	1.8703	6.63818	3.7489	0.382317	0.854293
2000	1085	23.6541	67.3756	0.511408	12.0489	1.09636	0.0322814	5.47653	1.84996	6.61585	3.75105	0.383893	0.858202
2000	1084	23.5471	67.4401	0.513526	12.0166	1.09703	0.0319394	5.47665	1.8298	6.59364	3.75314	0.385466	0.862103
2000	1083	23.4411	67.5045	0.515639	11.9843	1.09769	0.031599	5.47669	1.80982	6.57154	3.75516	0.387035	0.865999
2000	1082	23.3363	67.5687	0.517747	11.9521	1.09833	0.0312603	5.47665	1.79001	6.54956	3.75713	0.3886	0.869888
2000	1081	23.2327	67.6328	0.519849	11.9199	1.09897	0.0309232	5.47653	1.77037	6.5277	3.75904	0.390161	0.87377
2000	1080	23.1301	67.6966	0.521947	11.8878	1.09959	0.0305877	5.47633	1.7509	6.50594	3.76089	0.391719	0.877646
2000	1079	23.0285	67.7603	0.524039	11.8557	1.10021	0.0302538	5.47606	1.7316	6.4843	3.76268	0.393272	0.881516
2000	1078	22.928	67.8239	0.526127	11.8237	1.10081	0.0299215	5.4757	1.71246	6.46278	3.76441	0.394822	0.88538
2000	1077	22.8285	67.8873	0.528209	11.7917	1.1014	0.0295908	5.47526	1.69349	6.44136	3.76609	0.396369	0.889237
2000	1076	22.7301	67.9505	0.530286	11.7598	1.10198	0.0292617	5.47475	1.67468	6.42005	3.76771	0.397912	0.893089
2000	1075	22.6326	68.0136	0.532358	11.7279	1.10255	0.0289342	5.47415	1.65603	6.39885	3.76927	0.399451	0.896934
2000	1074	22.5362	68.0765	0.534426	11.6961	1.10311	0.0286083	5.47348	1.63755	6.37776	3.77078	0.400986	0.900774
2000	1073	22.4407	68.1392	0.536488	11.6643	1.10365	0.0282839	5.47273	1.61922	6.35677	3.77223	0.402518	0.904608
2000	1072	22.3461	68.2019	0.538546	11.6325	1.10419	0.0279611	5.47189	1.60105	6.3359	3.77363	0.404047	0.908436
2000	1071	22.2525	68.2643	0.540598	11.6008	1.10471	0.0276399	5.47098	1.58303	6.31512	3.77497	0.405572	0.912258
2000	1070	22.1598	68.3266	0.542646	11.5691	1.10522	0.0273202	5.46999	1.56517	6.29446	3.77627	0.407094	0.916075
2000	1069	22.068	68.3888	0.544689	11.5375	1.10573	0.027002	5.46891	1.54746	6.2739	3.77751	0.408612	0.919886
2000	1068	21.977	68.4508	0.546727	11.5059	1.10622	0.0266854	5.46776	1.5299	6.25344	3.77869	0.410127	0.923691
2000	1067	21.887	68.5127	0.54876	11.4744	1.1067	0.0263702	5.46652	1.51249	6.23308	3.77983	0.411638	0.927491
2000	1066	21.7978	68.5744	0.550789	11.443	1.10716	0.0260566	5.46521	1.49523	6.21282	3.78092	0.413146	0.931285
2000	1065	21.7095	68.636	0.552813	11.4115	1.10762	0.0257444	5.46381	1.47812	6.19267	3.78195	0.414651	0.935075
2000	1064	21.622	68.6975	0.554832	11.3801	1.10806	0.0254338	5.46233	1.46115	6.17262	3.78294	0.416153	0.938858
2000	1063	21.5353	68.7588	0.556846	11.3488	1.10849	0.0251246	5.46077	1.44432	6.15267	3.78387	0.417651	0.942637
2000	1062	21.4495	68.82	0.558856	11.3175	1.10891	0.0248168	5.45912	1.42764	6.13281	3.78476	0.419147	0.946411
2000	1061	21.3644	68.8811	0.560861	11.2863	1.10932	0.0245105	5.4574	1.4111	6.11305	3.7856	0.420639	0.950179
2000	1060	21.2801	68.942	0.562861	11.2551	1.10972	0.0242056	5.45559	1.39469	6.0934	3.78639	0.422128	0.953942
2000	1059	21.1966	69.0028	0.564857	11.2239	1.11011	0.0239022	5.4537	1.37843	6.07383	3.78714	0.423614	0.957701
2000	1058	21.1139	69.0635	0.566848	11.1928	1.11048	0.0236001	5.45173	1.36231	6.05437	3.78784	0.425097	0.961454
2000	1057	21.0319	69.124	0.568834	11.1618	1.11084	0.0232994	5.44967	1.34632	6.035	3.78849	0.426576	0.965202
2000	1056	20.9506	69.1844	0.570816	11.1308	1.11119	0.0230001	5.44753	1.33046	6.01572	3.78909	0.428053	0.968946
2000	1055	20.8701	69.2447	0.572793	11.0998	1.11153	0.0227021	5.4453	1.31474	5.99654	3.78966	0.429527	0.972685
2000	1054	20.7902	69.3049	0.574765	11.0689	1.11185	0.0224055	5.44299	1.29915	5.97745	3.79017	0.430998	0.976419
2000	1053	20.7111	69.365	0.576733	11.038	1.11216	0.0221102	5.44059	1.2837	5.95846	3.79064	0.432466	0.980149
2000	1052	20.6327	69.4249	0.578696	11.0072	1.11246	0.0218162	5.43811	1.26837	5.93955	3.79107	0.433931	0.983874
2000	1051	20.555	69.4848	0.580655	10.9764	1.11275	0.0215235	5.43554	1.25317	5.92074	3.79146	0.435394	0.987595
2000	1050	20.4779	69.5445	0.582609	10.9457	1.11302	0.0212321	5.43289	1.2381	5.90202	3.7918	0.436853	0.991311
2000	1049	20.4015	69.6041	0.584558	10.915	1.11328	0.0209419	5.43014	1.22316	5.88339	3.7921	0.43831	0.995023
2000	1048	20.3258	69.6636	0.586503	10.8844	1.11353	0.0206529	5.42732	1.20834	5.86484	3.79236	0.439764	0.99873
2000	1047	20.2507	69.723	0.588443	10.8538	1.11377	0.0203651	5.4244	1.19365	5.84639	3.79258	0.441215	1.00243
2000	1046	20.1763	69.7823	0.590379	10.8233	1.11399	0.0200786	5.42139	1.17909	5.82802	3.79275	0.442663	1.00613
2000	1045	20.1024	69.8414	0.59231	10.7928	1.1142	0.0197932	5.4183	1.16464	5.80974	3.79289	0.444109	1.00983
2000	1044	20.0292	69.9005	0.594236	10.7623	1.11439	0.0195089	5.41511	1.15032	5.79155	3.79298	0.445553	1.01352
2000	1043	19.9566	69.9595	0.596157	10.7319	1.11457	0.0192258	5.41184	1.13612	5.77344	3.79304	0.446993	1.01721
2000	1042	19.8846	70.0184	0.598074	10.7016	1.11474	0.0189438	5.40848	1.12203	5.75542	3.79306	0.448431	1.02089
2000	1041	19.8132	70.0771	0.599986	10.6713	1.1149	0.0186628	5.40502	1.10807	5.73748	3.79303	0.449867	1.02457
2000	1040	19.7424	70.1358	0.601894	10.641	1.11504	0.0183829	5.40147	1.09422	5.71963	3.79297	0.4513	1.02824
2000	1039	19.6722	70.1944	0.603797	10.6108	1.11516	0.018104	5.39783	1.0805	5.70186	3.79288	0.45273	1.03191
2000	1038	19.6025	70.2529	0.605695	10.5807	1.11528	0.0178261	5.3941	1.06688	5.68417	3.79274	0.454158	1.03558
2000	1037	19.5334	70.3113	0.607588	10.5506	1.11537	0.0175492	5.39027	1.05338	5.66657	3.79257	0.455584	1.03925
2000	1036	19.4648	70.3696	0.609476	10.5205	1.11546	0.0172733	5.38635	1.04	5.64905	3.79236	0.457007	1.04291
2000	1035	19.3968	70.4279	0.61136	10.4905	1.11552	0.0169982	5.38233	1.02673	5.6316	3.79211	0.458428	1.04656
2000	1034	19.3294	70.486	0.613238	10.4605	1.11558	0.0167241	5.37821	1.01357	5.61424	3.79183	0.459847	1.05022
2000	1033	19.2624	70.5441	0.615112	10.4306	1.11561	0.0164508	5.374	1.00053	5.59695	3.79152	0.461263	1.05387
2000	1032	19.196	70.6021	0.61698	10.4007	1.11564	0.0161784	5.3697	0.987594	5.57975	3.79117	0.462677	1.05751
2000	1031	19.1301	70.66	0.618844	10.3709	1.11565	0.0159067	5.36529	0.974769	5.56262	3.79078	0.464089	1.06116
2000	1030	19.0647	70.7178	0.620702	10.3411	1.11564	0.0156358	5.36079	0.962053	5.54557	3.79036	0.465498	1.0648
2000	1029	18.9998	70.7756	0.622555	10.3114	1.11561	0.0153657	5.35618	0.949446	5.5286	3.78991	0.466905	1.06843
2000	1028	18.9354	70.8333	0.624403	10.2818	1.11557	0.0150962	5.35148	0.936946	5.5117	3.78942	0.468311	1.07207
2000	1027	18.8714	70.8909	0.626245	10.2521	1.11552	0.0148275	5.34667	0.924554	5.49488	3.7889	0.469714	1.0757
2000	1026	18.808	70.9484	0.628082	10.2226	1.11544	0.0145594	5.34176	0.912267	5.47813	3.78835	0.471115	1.07933
2000	1025	18.7451	71.0059	0.629914	10.193	1.11535	0.0142918	5.33675	0.900086	5.46145	3.78777	0.472514	1.08295
2000	1024	18.6826	71.0633	0.63174	10.1636	1.11525	0.0140249	5.33163	0.88801	5.44485	3.78715	0.473911	1.08657
2000	1023	18.6205	71.1207	0.63356	10.1341	1.11512	0.0137585	5.32641	0.876037	5.42832	3.7865	0.475305	1.09019
2000	1022	18.559	71.1779	0.635374	10.1048	1.11498	0.0134926	5.32108	0.864168	5.41187	3.78583	0.476698	1.09381
2000	1021	18.4978	71.2352	0.637182	10.0754	1.11482	0.0132272	5.31564	0.852402	5.39548	3.78512	0.47809	1.09743
2000	1020	18.4371	71.2924	0.638985	10.0461	1.11465	0.0129623	5.3101	0.840737	5.37917	3.78438	0.479479	1.10104
2000	1019	18.3769	71.3495	0.640781	10.0169	1.11445	0.0126978	5.30444	0.829174	5.36292	3.78361	0.480866	1.10465
2000	1018	18.3171	71.4066	0.642571	9.98774	1.11424	0.0124336	5.29868	0.817712	5.34674	3.78281	0.482252	1.10825
2000	1017	18.2577	71.4636	0.644354	9.9586	1.11401	0.0121698	5.2928	0.806349	5.33064	3.78199	0.483635	1.11186
2000	1016	18.1987	71.5206	0.646131	9.92952	1.11376	0.0119064	5.28682	0.795086	5.3146	3.78113	0.485018	1.11546
2000	1015	18.1402	71.5775	0.6479	9.90049	1.11349	0.0116433	5.28071	0.783922	5.29862	3.78025	0.486398	1.11906
2000	1014	18.082	71.6344	0.649663	9.8715	1.1132	0.0113804	5.2745	0.772856	5.28272	3.77933	0.487777	1.12266
2000	1013	18.0243	71.6913	0.651418	9.84257	1.11289	0.0111179	5.26817	0.761888	5.26687	3.77839	0.489154	1.12626
2000	1012	17.9669	71.7481	0.653166	9.81368	1.11256	0.0108556	5.26172	0.751017	5.2511	3.77743	0.490529	1.12985
2000	1011	17.91	71.8049	0.654906	9.78485	1.11221	0.0105936	5.25515	0.740243	5.23538	3.77643	0.491903	1.13345
2000	1010	17.8534	71.8616	0.656638	9.75606	1.11184	0.0103318	5.24846	0.729564	5.21973	3.77541	0.493275	1.13704
2000	1009	17.7972	71.9184	0.658362	9.72733	1.11145	0.0100702	5.24165	0.718982	5.20414	3.77437	0.494646	1.14063
2000	1008	17.7414	71.9751	0.660078	9.69865	1.11104	0.00980892	5.23472	0.708494	5.18862	3.7733	0.496015	1.14421
2000	1007	17.686	72.0318	0.661784	9.67001	1.1106	0.00954789	5.22767	0.698101	5.17315	3.7722	0.497383	1.1478
2000	1006	17.6309	72.0884	0.663481	9.64143	1.11014	0.00928714	5.22049	0.687802	5.15774	3.77108	0.49875	1.15138
2000	1005	17.5762	72.145	0.665169	9.6129	1.10967	0.00902671	5.21318	0.677597	5.1424	3.76993	0.500115	1.15497
2000	1004	17.5219	72.2017	0.666848	9.58442	1.10916	0.00876661	5.20575	0.667485	5.12711	3.76876	0.501478	1.15855
2000	1003	17.4679	72.2583	0.668516	9.55599	1.10864	0.00850691	5.19819	0.657465	5.11188	3.76756	0.502841	1.16213
2000	1002	17.4143	72.3149	0.670173	9.52762	1.10809	0.00824765	5.1905	0.647539	5.0967	3.76634	0.504202	1.16571
2000	1001	17.361	72.3715	0.67182	9.49929	1.10752	0.00798888	5.18267	0.637704	5.08158	3.7651	0.505562	1.16929
2000	1000	17.3081	72.4281	0.673455	9.47102	1.10692	0.0077307	5.17472	0.62796	5.06652	3.76384	0.50692	1.17286
2000	999	17.2554	72.4846	0.675078	9.4428	1.1063	0.00747318	5.16663	0.618308	5.05151	3.76255	0.508278	1.17644
2000	998	17.2032	72.5412	0.676689	9.41463	1.10566	0.00721641	5.1584	0.608747	5.03655	3.76124	0.509634	1.18002
2000	997	17.1512	72.5978	0.678288	9.38652	1.10499	0.00696051	5.15004	0.599276	5.02165	3.75991	0.510989	1.18359
2000	996	17.0996	72.6544	0.679874	9.35846	1.10429	0.00670558	5.14153	0.589896	5.00679	3.75855	0.512343	1.18716
2000	995	17.0483	72.711	0.681446	9.33045	1.10357	0.00645178	5.13289	0.580605	4.99199	3.75718	0.513696	1.19074
2000	994	16.9973	72.7676	0.683003	9.30249	1.10282	0.00619923	5.12411	0.571404	4.97724	3.75578	0.515048	1.19431
2000	993	16.9466	72.8242	0.684547	9.27459	1.10205	0.00594809	5.11518	0.562292	4.96254	3.75436	0.516399	1.19788
2000	992	16.8963	72.8809	0.686075	9.24674	1.10124	0.00569854	5.10612	0.553269	4.94788	3.75293	0.517749	1.20145
2000	991	16.8462	72.9375	0.687587	9.21895	1.10041	0.00545076	5.0969	0.544334	4.93327	3.75147	0.519098	1.20502
2000	990	16.7964	72.9942	0.689083	9.1912	1.09956	0.00520495	5.08754	0.535488	4.91871	3.74999	0.520446	1.20859
2000	989	16.747	73.0509	0.690562	9.16352	1.09867	0.0049613	5.07804	0.52673	4.90419	3.7485	0.521793	1.21216
2000	988	16.6978	73.1076	0.692024	9.13588	1.09776	0.00472005	5.06838	0.51806	4.88972	3.74698	0.52314	1.21573
2000	987	16.649	73.1644	0.693468	9.1083	1.09681	0.00448142	5.05858	0.509477	4.87529	3.74545	0.524485	1.2193
2000	986	16.6004	73.2211	0.694893	9.08078	1.09584	0.00424567	5.04862	0.500982	4.86091	3.74389	0.52583	1.22286
2000	985	16.5521	73.278	0.696298	9.05331	1.09484	0.00401304	5.03851	0.492574	4.84656	3.74232	0.527174	1.22643
2000	984	16.5041	73.3348	0.697684	9.02589	1.09381	0.0037838	5.02825	0.484253	4.83226	3.74073	0.528517	1.23
2000	983	16.4563	73.3917	0.699049	8.99853	1.09275	0.00355823	5.01784	0.476019	4.818	3.73912	0.529859	1.23357
2000	982	16.4089	73.4486	0.700392	8.97122	1.09165	0.00333662	5.00727	0.467871	4.80378	3.7375	0.531201	1.23714
2000	981	16.3617	73.5056	0.701714	8.94397	1.09053	0.00311927	4.99654	0.459809	4.78959	3.73585	0.532541	1.2407
2000	980	16.3148	73.5626	0.703013	8.91677	1.08937	0.00290646	4.98566	0.451834	4.77545	3.73419	0.533882	1.24427
2000	979	16.2681	73.6197	0.704288	8.88963	1.08819	0.00269853	4.97462	0.443944	4.76134	3.73251	0.535221	1.24784
2000	978	16.2217	73.6768	0.70554	8.86255	1.08697	0.00249578	4.96342	0.436141	4.74726	3.73082	0.53656	1.25141
2000	977	16.1756	73.734	0.706766	8.83552	1.08572	0.00229854	4.95206	0.428423	4.73322	3.72911	0.537899	1.25498
2000	976	16.1297	73.7912	0.707966	8.80854	1.08443	0.00210715	4.94054	0.42079	4.71922	3.72738	0.539236	1.25855
2000	975	16.0841	73.8485	0.70914	8.78162	1.08312	0.00192192	4.92886	0.413243	4.70525	3.72564	0.540573	1.26212
2000	974	16.0387	73.9059	0.710286	8.75476	1.08176	0.0017432	4.91702	0.405781	4.69131	3.72388	0.54191	1.26569
2000	973	15.9936	73.9633	0.711403	8.72795	1.08038	0.00157133	4.90501	0.398404	4.6774	3.7221	0.543246	1.26925
2000	972	15.9488	74.0208	0.712491	8.7012	1.07896	0.00140664	4.89284	0.391112	4.66353	3.72031	0.544582	1.27282
2000	971	15.9042	74.0783	0.713549	8.6745	1.07751	0.00124947	4.8805	0.383905	4.64968	3.7185	0.545917	1.2764
2000	970	15.8598	74.1359	0.714574	8.64786	1.07602	0.00110016	4.86799	0.376782	4.63586	3.71668	0.547251	1.27997
2000	969	15.8157	74.1936	0.715567	8.62127	1.0745	0.000959038	4.85532	0.369745	4.62207	3.71484	0.548585	1.28354
2000	968	15.7718	74.2514	0.716525	8.59474	1.07294	0.000826441	4.84247	0.362792	4.60831	3.71299	0.549919	1.28711
2000	967	15.7281	74.3092	0.717446	8.56827	1.07134	0.000702688	4.82945	0.355924	4.59458	3.71112	0.551252	1.29068
2000	966	15.6847	74.3672	0.718329	8.54185	1.06971	0.000588097	4.81625	0.349141	4.58087	3.70924	0.552585	1.29426
2000	965	15.6415	74.4252	0.71917	8.51549	1.06803	0.000482975	4.80286	0.342444	4.56718	3.70735	0.553917	1.29783
2000	964	15.5985	74.4834	0.719966	8.48918	1.06632	0.000387619	4.78929	0.335832	4.55352	3.70544	0.55525	1.30141
2000	963	15.5557	74.5417	0.720713	8.46293	1.06456	0.000302309	4.77551	0.329306	4.53987	3.70352	0.556582	1.30498
2000	962	15.5132	74.6002	0.721403	8.43674	1.06275	0.000227311	4.76152	0.322868	4.52625	3.70158	0.557914	1.30856
2000	961	15.4709	74.6588	0.722027	8.4106	1.0609	0.000162864	4.7473	0.316519	4.51264	3.69963	0.559247	1.31214
2000	960	15.4287	74.7177	0.72257	8.38451	1.05898	0.000109175	4.7328	0.310263	4.49904	3.69768	0.56058	1.31573
2000	959	15.3867	74.777	0.723003	8.35849	1.057	6.64014e-05	4.71797	0.304103	4.48545	3.69571	0.561914	1.31932
2000	958	15.3449	74.8368	0.723273	8.33251	1.05491	3.46146e-05	4.70266	0.298053	4.47184	3.69374	0.563251	1.32291
2000	957	15.305	74.8872	0.72595	8.30661	1.05405	0	4.69328	0.291548	4.45893	3.69155	0.564529	1.32637
2000	956	15.2645	74.9417	0.727558	8.28076	1.05261	0	4.68111	0.285362	4.44575	3.68944	0.565831	1.32988
2000	955	15.2191	75.0265	0.721308	8.25489	1.04716	0	4.64967	0.280926	4.43048	3.68795	0.567318	1.33385
2000	954	15.1742	75.1096	0.715472	8.22899	1.04188	0	4.61912	0.276455	4.4155	3.68639	0.568794	1.3378
2000	953	15.1296	75.1924	0.709738	8.20305	1.03661	0	4.58866	0.272012	4.40077	3.68477	0.570267	1.34174
2000	952	15.0853	75.2748	0.704064	8.17714	1.03136	0	4.55835	0.267624	4.38611	3.68312	0.571736	1.34568
2000	951	15.0414	75.3569	0.69845	8.15128	1.02613	0	4.5282	0.263291	4.37152	3.68144	0.5732	1.3496
2000	950	14.9979	75.4386	0.692895	8.12545	1.02091	0	4.4982	0.259011	4.357	3.67972	0.574659	1.35352
2000	949	14.9548	75.52	0.687398	8.09967	1.01572	0	4.46836	0.254785	4.34254	3.67797	0.576114	1.35743
2000	948	14.912	75.6011	0.681959	8.07393	1.01053	0	4.43866	0.250611	4.32815	3.67618	0.577564	1.36132
2000	947	14.8695	75.6818	0.676577	8.04823	1.00537	0	4.40912	0.24649	4.31383	3.67436	0.57901	1.36521
2000	946	14.8274	75.7622	0.671252	8.02257	1.00022	0	4.37972	0.242419	4.29957	3.67251	0.580451	1.36909
2000	945	14.7856	75.8422	0.665983	7.99695	0.995095	0	4.35048	0.2384	4.28538	3.67063	0.581887	1.37296
2000	944	14.7441	75.922	0.66077	7.97138	0.989982	0	4.32138	0.234431	4.27126	3.66871	0.583319	1.37682
2000	943	14.703	76.0013	0.655611	7.94585	0.984886	0	4.29243	0.230512	4.2572	3.66676	0.584747	1.38067
2000	942	14.6622	76.0804	0.650507	7.92036	0.979806	0	4.26362	0.226643	4.2432	3.66478	0.58617	1.38451
2000	941	14.6218	76.1591	0.645456	7.89492	0.974744	0	4.23496	0.222821	4.22926	3.66276	0.587589	1.38834
2000	940	14.5816	76.2376	0.640459	7.86952	0.969698	0	4.20644	0.219049	4.21539	3.66072	0.589003	1.39216
2000	939	14.5418	76.3156	0.635514	7.84416	0.964668	0	4.17807	0.215323	4.20159	3.65865	0.590413	1.39598
2000	938	14.5022	76.3934	0.630622	7.81884	0.959655	0	4.14984	0.211645	4.18784	3.65654	0.591819	1.39978
2000	937	14.463	76.4709	0.625781	7.79357	0.954659	0	4.12175	0.208014	4.17416	3.65441	0.59322	1.40358
2000	936	14.4241	76.548	0.620992	7.76834	0.949678	0	4.09381	0.204429	4.16053	3.65224	0.594617	1.40737
2000	935	14.3855	76.6248	0.616253	7.74316	0.944715	0	4.066	0.200889	4.14697	3.65005	0.59601	1.41114
2000	934	14.3472	76.7013	0.611564	7.71802	0.939767	0	4.03834	0.197395	4.13347	3.64783	0.597398	1.41491
2000	933	14.3091	76.7775	0.606924	7.69293	0.934836	0	4.01081	0.193945	4.12003	3.64558	0.598783	1.41867
2000	932	14.2714	76.8534	0.602334	7.66787	0.929921	0	3.98343	0.19054	4.10665	3.6433	0.600162	1.42243
2000	931	14.2339	76.9289	0.597793	7.64287	0.925022	0	3.95618	0.187179	4.09332	3.64099	0.601538	1.42617
2000	930	14.1968	77.0042	0.593299	7.6179	0.920139	0	3.92907	0.18386	4.08006	3.63866	0.602909	1.4299
2000	929	14.1599	77.0792	0.588854	7.59299	0.915272	0	3.9021	0.180585	4.06685	3.63629	0.604276	1.43363
2000	928	14.1233	77.1538	0.584455	7.56811	0.910421	0	3.87526	0.177352	4.05371	3.6339	0.605639	1.43734
2000	927	14.0869	77.2282	0.580103	7.54329	0.905586	0	3.84856	0.174161	4.04062	3.63148	0.606998	1.44105
2000	926	14.0509	77.3022	0.575798	7.5185	0.900767	0	3.82199	0.171011	4.02758	3.62904	0.608353	1.44475
2000	925	14.0151	77.3759	0.571538	7.49377	0.895964	0	3.79556	0.167903	4.0146	3.62657	0.609703	1.44844
2000	924	13.9795	77.4494	0.567324	7.46908	0.891177	0	3.76926	0.164835	4.00168	3.62407	0.61105	1.45212
2000	923	13.9443	77.5226	0.563155	7.44443	0.886405	0	3.7431	0.161808	3.98882	3.62155	0.612392	1.4558
2000	922	13.9093	77.5954	0.55903	7.41983	0.88165	0	3.71706	0.15882	3.97601	3.619	0.61373	1.45946
2000	921	13.8745	77.668	0.554949	7.39527	0.87691	0	3.69116	0.155872	3.96325	3.61643	0.615064	1.46312
2000	920	13.84	77.7402	0.550912	7.37076	0.872186	0	3.66539	0.152963	3.95056	3.61383	0.616394	1.46676
2000	919	13.8057	77.8122	0.546918	7.3463	0.867477	0	3.63976	0.150092	3.93791	3.61121	0.61772	1.4704
2000	918	13.7717	77.8839	0.542967	7.32188	0.862784	0	3.61425	0.14726	3.92532	3.60856	0.619042	1.47403
2000	917	13.738	77.9553	0.539058	7.29751	0.858107	0	3.58887	0.144466	3.91278	3.60589	0.62036	1.47765
2000	916	13.7045	78.0264	0.535191	7.27318	0.853445	0	3.56363	0.141709	3.9003	3.60319	0.621674	1.48127
2000	915	13.6712	78.0972	0.531366	7.2489	0.848799	0	3.53851	0.138989	3.88786	3.60047	0.622984	1.48487
2000	914	13.6382	78.1678	0.527582	7.22467	0.844169	0	3.51352	0.136306	3.87549	3.59773	0.624289	1.48847
2000	913	13.6054	78.238	0.523839	7.20048	0.839554	0	3.48865	0.13366	3.86316	3.59496	0.625591	1.49206
2000	912	13.5728	78.308	0.520136	7.17634	0.834954	0	3.46392	0.131049	3.85088	3.59217	0.626889	1.49564
2000	911	13.5405	78.3777	0.516473	7.15225	0.83037	0	3.43931	0.128474	3.83866	3.58936	0.628183	1.49921
2000	910	13.5084	78.4471	0.51285	7.1282	0.825802	0	3.41483	0.125934	3.82649	3.58652	0.629473	1.50277
2000	909	13.4765	78.5163	0.509266	7.1042	0.821249	0	3.39047	0.12343	3.81437	3.58366	0.630759	1.50633
2000	908	13.4448	78.5851	0.505721	7.08025	0.816711	0	3.36624	0.120959	3.8023	3.58078	0.632041	1.50987
2000	907	13.4134	78.6537	0.502214	7.05634	0.812189	0	3.34214	0.118524	3.79028	3.57788	0.633319	1.51341
2000	906	13.3822	78.722	0.498745	7.03248	0.807682	0	3.31816	0.116122	3.7783	3.57496	0.634594	1.51694
2000	905	13.3512	78.79	0.495314	7.00867	0.80319	0	3.2943	0.113753	3.76638	3.57201	0.635864	1.52047
2000	904	13.3204	78.8578	0.491921	6.9849	0.798714	0	3.27057	0.111418	3.75451	3.56905	0.637131	1.52398
2000	903	13.2898	78.9253	0.488565	6.96119	0.794253	0	3.24696	0.109116	3.74269	3.56606	0.638394	1.52748
2000	902	13.2595	78.9925	0.485245	6.93752	0.789808	0	3.22347	0.106846	3.73092	3.56305	0.639652	1.53098
2000	901	13.2293	79.0595	0.481961	6.91389	0.785378	0	3.20011	0.104609	3.71919	3.56002	0.640907	1.53447
2000	900	13.1994	79.1261	0.478714	6.89032	0.780963	0	3.17687	0.102403	3.70751	3.55697	0.642159	1.53795
Title:	O-magma	-	opx	at	liquidus
liquid_0	thermodynamic	data	and	composition:
Pressure	Temperature	mass	S	H	V	Cp	viscosity	SiO2	TiO2	Al2O3	Fe2O3	Cr2O3	FeO	MgO	CaO	Na2O	K2O	H2O	Mg#
2000	1400	99.7975	287.302	-1.25389e+06	38.9038	151.913	2.178	55.4373	0.132268	17.9964	0.698981	0.0100203	3.95591	8.23668	10.88	2.34776	0.101205	0.203412	78.8
2000	1400	99.7975	287.302	-1.25389e+06	38.9038	151.913	2.178	55.4373	0.132268	17.9964	0.698981	0.0100203	3.95591	8.23668	10.88	2.34776	0.101205	0.203412	78.8
2000	1399	99.7975	287.212	-1.25404e+06	38.9014	151.913	2.182	55.4373	0.132268	17.9964	0.699062	0.0100203	3.95584	8.23668	10.88	2.34775	0.101205	0.203412	78.8
2000	1398	99.7975	287.121	-1.25419e+06	38.899	151.913	2.186	55.4373	0.132268	17.9964	0.699143	0.0100203	3.95576	8.23668	10.88	2.34775	0.101205	0.203412	78.8
2000	1397	99.7975	287.03	-1.25434e+06	38.8966	151.913	2.19	55.4373	0.132268	17.9964	0.699226	0.0100203	3.95569	8.23668	10.88	2.34775	0.101205	0.203412	78.8
2000	1396	99.7975	286.939	-1.25449e+06	38.8942	151.913	2.194	55.4373	0.132268	17.9964	0.699309	0.0100203	3.95561	8.23668	10.88	2.34775	0.101205	0.203412	78.8
2000	1395	99.7975	286.848	-1.25465e+06	38.8918	151.913	2.198	55.4373	0.132268	17.9964	0.699394	0.0100203	3.95553	8.23668	10.88	2.34775	0.101205	0.203412	78.8
2000	1394	99.7975	286.757	-1.2548e+06	38.8894	151.912	2.202	55.4373	0.132268	17.9964	0.699479	0.0100203	3.95546	8.23668	10.88	2.34775	0.101205	0.203412	78.8
2000	1393	99.7975	286.666	-1.25495e+06	38.887	151.912	2.206	55.4373	0.132268	17.9964	0.699565	0.0100203	3.95538	8.23668	10.88	2.34775	0.101205	0.203412	78.8
2000	1392	99.7975	286.575	-1.2551e+06	38.8846	151.912	2.21	55.4372	0.132268	17.9964	0.699652	0.0100203	3.9553	8.23668	10.88	2.34775	0.101205	0.203412	78.8
2000	1391	99.7975	286.483	-1.25525e+06	38.8822	151.912	2.214	55.4372	0.132268	17.9964	0.699739	0.0100203	3.95522	8.23668	10.88	2.34775	0.101205	0.203412	78.8
2000	1390	99.7975	286.392	-1.25541e+06	38.8798	151.912	2.218	55.4372	0.132268	17.9964	0.699828	0.0100203	3.95514	8.23668	10.88	2.34775	0.101205	0.203412	78.8
2000	1389	99.7976	286.301	-1.25556e+06	38.8774	151.912	2.222	55.4372	0.132268	17.9964	0.699917	0.0100203	3.95506	8.23668	10.88	2.34775	0.101205	0.203412	78.8
2000	1388	99.7976	286.209	-1.25571e+06	38.875	151.912	2.226	55.4372	0.132268	17.9964	0.700007	0.0100203	3.95498	8.23667	10.88	2.34775	0.101205	0.203412	78.8
2000	1387	99.7976	286.118	-1.25586e+06	38.8726	151.912	2.23	55.4372	0.132268	17.9964	0.700098	0.0100203	3.9549	8.23667	10.88	2.34775	0.101205	0.203412	78.8
2000	1386	99.7976	286.026	-1.25601e+06	38.8702	151.912	2.234	55.4372	0.132268	17.9964	0.70019	0.0100203	3.95481	8.23667	10.88	2.34775	0.101205	0.203412	78.8
2000	1385	99.7976	285.935	-1.25617e+06	38.8678	151.912	2.238	55.4372	0.132268	17.9964	0.700283	0.0100203	3.95473	8.23667	10.88	2.34775	0.101205	0.203412	78.8
2000	1384	99.7976	285.843	-1.25632e+06	38.8654	151.912	2.242	55.4372	0.132268	17.9964	0.700377	0.0100203	3.95465	8.23667	10.88	2.34775	0.101205	0.203412	78.8
2000	1383	99.7976	285.751	-1.25647e+06	38.863	151.912	2.246	55.4372	0.132268	17.9964	0.700471	0.0100203	3.95456	8.23667	10.88	2.34775	0.101205	0.203412	78.8
2000	1382	99.7976	285.66	-1.25662e+06	38.8606	151.912	2.25	55.4372	0.132268	17.9964	0.700566	0.0100203	3.95447	8.23667	10.88	2.34775	0.101205	0.203412	78.8
2000	1381	99.7976	285.568	-1.25677e+06	38.8582	151.912	2.254	55.4372	0.132268	17.9964	0.700663	0.0100203	3.95439	8.23667	10.88	2.34775	0.101205	0.203412	78.8
2000	1380	99.7976	285.476	-1.25693e+06	38.8558	151.912	2.258	55.4372	0.132268	17.9964	0.70076	0.0100203	3.9543	8.23667	10.88	2.34775	0.101205	0.203412	78.8
2000	1379	99.7976	285.384	-1.25708e+06	38.8534	151.912	2.262	55.4372	0.132268	17.9964	0.700858	0.0100203	3.95421	8.23667	10.88	2.34775	0.101205	0.203412	78.8
2000	1378	99.7977	285.292	-1.25723e+06	38.851	151.912	2.266	55.4372	0.132268	17.9964	0.700957	0.0100203	3.95412	8.23667	10.88	2.34775	0.101205	0.203412	78.8
2000	1377	99.7977	285.2	-1.25738e+06	38.8486	151.912	2.27	55.4372	0.132268	17.9964	0.701056	0.0100203	3.95403	8.23667	10.88	2.34775	0.101205	0.203412	78.8
2000	1376	99.7977	285.108	-1.25753e+06	38.8462	151.912	2.274	55.4372	0.132268	17.9964	0.701157	0.0100203	3.95394	8.23666	10.88	2.34775	0.101205	0.203412	78.8
2000	1375	99.7977	285.016	-1.25769e+06	38.8438	151.912	2.278	55.4372	0.132268	17.9964	0.701258	0.0100203	3.95385	8.23666	10.88	2.34775	0.101205	0.203412	78.8
2000	1374	99.7977	284.924	-1.25784e+06	38.8414	151.912	2.282	55.4372	0.132268	17.9964	0.701361	0.0100203	3.95376	8.23666	10.88	2.34775	0.101205	0.203411	78.8
2000	1373	99.7977	284.832	-1.25799e+06	38.839	151.911	2.286	55.4371	0.132268	17.9964	0.701464	0.0100203	3.95366	8.23666	10.88	2.34775	0.101205	0.203411	78.8
2000	1372	99.7977	284.739	-1.25814e+06	38.8366	151.911	2.29	55.4371	0.132268	17.9964	0.701568	0.0100203	3.95357	8.23666	10.88	2.34775	0.101205	0.203411	78.8
2000	1371	99.7977	284.647	-1.25829e+06	38.8342	151.911	2.295	55.4371	0.132268	17.9964	0.701673	0.0100203	3.95347	8.23666	10.88	2.34775	0.101205	0.203411	78.8
2000	1370	99.7977	284.555	-1.25845e+06	38.8318	151.911	2.299	55.4371	0.132268	17.9964	0.701779	0.0100203	3.95338	8.23666	10.88	2.34775	0.101205	0.203411	78.8
2000	1369	99.7978	284.462	-1.2586e+06	38.8294	151.911	2.303	55.4371	0.132268	17.9964	0.701886	0.0100203	3.95328	8.23666	10.88	2.34775	0.101205	0.203411	78.8
2000	1368	99.7978	284.37	-1.25875e+06	38.827	151.911	2.307	55.4371	0.132267	17.9964	0.701994	0.0100203	3.95318	8.23666	10.88	2.34775	0.101205	0.203411	78.8
2000	1367	99.7978	284.277	-1.2589e+06	38.8246	151.911	2.311	55.4371	0.132267	17.9964	0.702102	0.0100203	3.95309	8.23666	10.88	2.34775	0.101205	0.203411	78.8
2000	1366	99.7978	284.184	-1.25905e+06	38.8222	151.911	2.315	55.4371	0.132267	17.9964	0.702212	0.0100203	3.95299	8.23666	10.88	2.34775	0.101205	0.203411	78.8
2000	1365	99.7978	284.092	-1.25921e+06	38.8198	151.911	2.319	55.4371	0.132267	17.9964	0.702322	0.0100203	3.95289	8.23666	10.88	2.34775	0.101205	0.203411	78.8
2000	1364	99.7978	283.999	-1.25936e+06	38.8174	151.911	2.323	55.4371	0.132267	17.9964	0.702434	0.0100203	3.95279	8.23665	10.88	2.34775	0.101205	0.203411	78.8
2000	1363	99.7978	283.906	-1.25951e+06	38.815	151.911	2.327	55.4371	0.132267	17.9964	0.702546	0.0100203	3.95268	8.23665	10.88	2.34775	0.101205	0.203411	78.8
2000	1362	99.7978	283.813	-1.25966e+06	38.8126	151.911	2.332	55.4371	0.132267	17.9964	0.702659	0.0100203	3.95258	8.23665	10.88	2.34775	0.101205	0.203411	78.8
2000	1361	99.7978	283.72	-1.25981e+06	38.8102	151.911	2.336	55.4371	0.132267	17.9964	0.702773	0.0100203	3.95248	8.23665	10.88	2.34775	0.101205	0.203411	78.8
2000	1360	99.7979	283.628	-1.25997e+06	38.8078	151.911	2.34	55.4371	0.132267	17.9964	0.702888	0.0100203	3.95237	8.23665	10.88	2.34775	0.101205	0.203411	78.8
2000	1359	99.7979	283.535	-1.26012e+06	38.8054	151.911	2.344	55.4371	0.132267	17.9964	0.703004	0.0100203	3.95227	8.23665	10.88	2.34775	0.101205	0.203411	78.8
2000	1358	99.7979	283.441	-1.26027e+06	38.803	151.911	2.348	55.4371	0.132267	17.9964	0.703121	0.0100203	3.95216	8.23665	10.88	2.34775	0.101205	0.203411	78.8
2000	1357	99.7979	283.348	-1.26042e+06	38.8006	151.911	2.352	55.437	0.132267	17.9964	0.703239	0.0100203	3.95206	8.23665	10.88	2.34775	0.101205	0.203411	78.8
2000	1356	99.7979	283.255	-1.26058e+06	38.7982	151.911	2.357	55.437	0.132267	17.9964	0.703358	0.0100203	3.95195	8.23665	10.88	2.34774	0.101205	0.203411	78.8
2000	1355	99.7979	283.162	-1.26073e+06	38.7958	151.911	2.361	55.437	0.132267	17.9964	0.703477	0.0100202	3.95184	8.23665	10.88	2.34774	0.101205	0.203411	78.8
2000	1354	99.7979	283.069	-1.26088e+06	38.7934	151.911	2.365	55.437	0.132267	17.9964	0.703598	0.0100202	3.95173	8.23664	10.88	2.34774	0.101205	0.203411	78.8
2000	1353	99.7979	282.975	-1.26103e+06	38.791	151.911	2.369	55.437	0.132267	17.9964	0.703719	0.0100202	3.95162	8.23664	10.88	2.34774	0.101205	0.203411	78.8
2000	1352	99.7979	282.882	-1.26118e+06	38.7886	151.911	2.373	55.437	0.132267	17.9964	0.703842	0.0100202	3.95151	8.23664	10.88	2.34774	0.101204	0.203411	78.8
2000	1351	99.798	282.788	-1.26134e+06	38.7862	151.911	2.377	55.437	0.132267	17.9964	0.703965	0.0100202	3.9514	8.23664	10.88	2.34774	0.101204	0.203411	78.8
2000	1350	99.798	282.695	-1.26149e+06	38.7838	151.911	2.382	55.437	0.132267	17.9964	0.704089	0.0100202	3.95129	8.23664	10.88	2.34774	0.101204	0.203411	78.8
2000	1349	99.798	282.601	-1.26164e+06	38.7814	151.911	2.386	55.437	0.132267	17.9964	0.704215	0.0100202	3.95117	8.23664	10.88	2.34774	0.101204	0.203411	78.8
2000	1348	99.798	282.508	-1.26179e+06	38.779	151.911	2.39	55.437	0.132267	17.9964	0.704341	0.0100202	3.95106	8.23664	10.88	2.34774	0.101204	0.203411	78.8
2000	1347	99.798	282.414	-1.26194e+06	38.7767	151.911	2.394	55.437	0.132267	17.9963	0.704468	0.0100202	3.95095	8.23664	10.88	2.34774	0.101204	0.203411	78.8
2000	1346	99.798	282.32	-1.2621e+06	38.7743	151.911	2.399	55.437	0.132267	17.9963	0.704596	0.0100202	3.95083	8.23664	10.88	2.34774	0.101204	0.203411	78.8
2000	1345	99.798	282.226	-1.26225e+06	38.7719	151.91	2.403	55.437	0.132267	17.9963	0.704725	0.0100202	3.95071	8.23664	10.88	2.34774	0.101204	0.203411	78.8
2000	1344	99.798	282.132	-1.2624e+06	38.7695	151.91	2.407	55.437	0.132267	17.9963	0.704855	0.0100202	3.9506	8.23663	10.88	2.34774	0.101204	0.203411	78.8
2000	1343	99.7981	282.038	-1.26255e+06	38.7671	151.91	2.411	55.4369	0.132267	17.9963	0.704986	0.0100202	3.95048	8.23663	10.88	2.34774	0.101204	0.203411	78.8
2000	1342	99.7981	281.944	-1.2627e+06	38.7647	151.91	2.415	55.4369	0.132267	17.9963	0.705118	0.0100202	3.95036	8.23663	10.88	2.34774	0.101204	0.203411	78.8
2000	1341	99.7981	281.85	-1.26286e+06	38.7623	151.91	2.42	55.4369	0.132267	17.9963	0.705251	0.0100202	3.95024	8.23663	10.88	2.34774	0.101204	0.203411	78.8
2000	1340	99.7981	281.756	-1.26301e+06	38.7599	151.91	2.424	55.4369	0.132267	17.9963	0.705385	0.0100202	3.95012	8.23663	10.88	2.34774	0.101204	0.203411	78.8
2000	1339	99.7981	281.662	-1.26316e+06	38.7575	151.91	2.428	55.4369	0.132267	17.9963	0.70552	0.0100202	3.94999	8.23663	10.88	2.34774	0.101204	0.203411	78.8
2000	1338	99.7981	281.568	-1.26331e+06	38.7551	151.91	2.432	55.4369	0.132267	17.9963	0.705656	0.0100202	3.94987	8.23663	10.88	2.34774	0.101204	0.203411	78.8
2000	1337	99.7981	281.474	-1.26346e+06	38.7527	151.91	2.437	55.4369	0.132267	17.9963	0.705793	0.0100202	3.94975	8.23663	10.88	2.34774	0.101204	0.203411	78.8
2000	1336	99.7982	281.379	-1.26362e+06	38.7503	151.91	2.441	55.4369	0.132267	17.9963	0.705931	0.0100202	3.94962	8.23663	10.88	2.34774	0.101204	0.203411	78.8
2000	1335	99.7982	281.285	-1.26377e+06	38.7479	151.91	2.445	55.4369	0.132267	17.9963	0.70607	0.0100202	3.9495	8.23662	10.88	2.34774	0.101204	0.203411	78.8
2000	1334	99.7982	281.19	-1.26392e+06	38.7455	151.91	2.45	55.4369	0.132267	17.9963	0.706209	0.0100202	3.94937	8.23662	10.88	2.34774	0.101204	0.203411	78.8
2000	1333	99.7982	281.096	-1.26407e+06	38.7431	151.91	2.454	55.4369	0.132267	17.9963	0.70635	0.0100202	3.94924	8.23662	10.88	2.34774	0.101204	0.20341	78.8
2000	1332	99.7982	281.001	-1.26423e+06	38.7407	151.91	2.458	55.4369	0.132267	17.9963	0.706492	0.0100202	3.94912	8.23662	10.88	2.34774	0.101204	0.20341	78.8
2000	1331	99.7982	280.907	-1.26438e+06	38.7383	151.91	2.462	55.4369	0.132267	17.9963	0.706635	0.0100202	3.94899	8.23662	10.88	2.34774	0.101204	0.20341	78.8
2000	1330	99.7982	280.812	-1.26453e+06	38.7359	151.91	2.467	55.4368	0.132267	17.9963	0.706778	0.0100202	3.94886	8.23662	10.88	2.34774	0.101204	0.20341	78.8
2000	1329	99.7983	280.717	-1.26468e+06	38.7335	151.91	2.471	55.4368	0.132267	17.9963	0.706923	0.0100202	3.94873	8.23662	10.8799	2.34774	0.101204	0.20341	78.8
2000	1328	99.7983	280.622	-1.26483e+06	38.7311	151.91	2.475	55.4368	0.132267	17.9963	0.707069	0.0100202	3.94859	8.23662	10.8799	2.34774	0.101204	0.20341	78.8
2000	1327	99.7983	280.528	-1.26499e+06	38.7288	151.91	2.48	55.4368	0.132267	17.9963	0.707216	0.0100202	3.94846	8.23661	10.8799	2.34774	0.101204	0.20341	78.8
2000	1326	99.7983	280.433	-1.26514e+06	38.7264	151.91	2.484	55.4368	0.132267	17.9963	0.707364	0.0100202	3.94833	8.23661	10.8799	2.34774	0.101204	0.20341	78.8
2000	1325	99.7983	280.338	-1.26529e+06	38.724	151.91	2.488	55.4368	0.132267	17.9963	0.707512	0.0100202	3.94819	8.23661	10.8799	2.34773	0.101204	0.20341	78.8
2000	1324	99.7983	280.243	-1.26544e+06	38.7216	151.91	2.493	55.4368	0.132267	17.9963	0.707662	0.0100202	3.94806	8.23661	10.8799	2.34773	0.101204	0.20341	78.8
2000	1323	99.7983	280.147	-1.26559e+06	38.7192	151.91	2.497	55.4368	0.132267	17.9963	0.707813	0.0100202	3.94792	8.23661	10.8799	2.34773	0.101204	0.20341	78.8
2000	1322	99.7984	280.052	-1.26575e+06	38.7168	151.91	2.501	55.4368	0.132267	17.9963	0.707965	0.0100202	3.94778	8.23661	10.8799	2.34773	0.101204	0.20341	78.8
2000	1321	99.7984	279.957	-1.2659e+06	38.7144	151.91	2.506	55.4368	0.132267	17.9963	0.708118	0.0100202	3.94764	8.23661	10.8799	2.34773	0.101204	0.20341	78.8
2000	1320	99.7984	279.862	-1.26605e+06	38.712	151.91	2.51	55.4368	0.132267	17.9963	0.708272	0.0100202	3.94751	8.23661	10.8799	2.34773	0.101204	0.20341	78.8
2000	1319	99.7984	279.766	-1.2662e+06	38.7096	151.91	2.515	55.4368	0.132267	17.9963	0.708427	0.0100202	3.94737	8.2366	10.8799	2.34773	0.101204	0.20341	78.8
2000	1318	99.7984	279.671	-1.26636e+06	38.7072	151.91	2.519	55.4367	0.132267	17.9963	0.708583	0.0100202	3.94722	8.2366	10.8799	2.34773	0.101204	0.20341	78.8
2000	1317	99.7984	279.576	-1.26651e+06	38.7048	151.91	2.523	55.4367	0.132267	17.9963	0.70874	0.0100202	3.94708	8.2366	10.8799	2.34773	0.101204	0.20341	78.8
2000	1316	99.7985	279.48	-1.26666e+06	38.7024	151.91	2.528	55.4367	0.132267	17.9963	0.708898	0.0100202	3.94694	8.2366	10.8799	2.34773	0.101204	0.20341	78.8
2000	1315	99.7985	279.384	-1.26681e+06	38.7	151.91	2.532	55.4367	0.132267	17.9963	0.709057	0.0100202	3.9468	8.2366	10.8799	2.34773	0.101204	0.20341	78.8
2000	1314	99.7985	279.289	-1.26696e+06	38.6977	151.91	2.536	55.4367	0.132267	17.9963	0.709217	0.0100202	3.94665	8.2366	10.8799	2.34773	0.101204	0.20341	78.8
2000	1313	99.7985	279.193	-1.26712e+06	38.6953	151.91	2.541	55.4367	0.132267	17.9963	0.709378	0.0100202	3.9465	8.2366	10.8799	2.34773	0.101204	0.20341	78.8
2000	1312	99.7985	279.097	-1.26727e+06	38.6929	151.91	2.545	55.4367	0.132266	17.9963	0.70954	0.0100202	3.94636	8.2366	10.8799	2.34773	0.101204	0.20341	78.8
2000	1311	99.7985	279.001	-1.26742e+06	38.6905	151.91	2.55	55.4367	0.132266	17.9963	0.709704	0.0100202	3.94621	8.23659	10.8799	2.34773	0.101204	0.20341	78.8
2000	1310	99.7986	278.906	-1.26757e+06	38.6881	151.91	2.554	55.4367	0.132266	17.9963	0.709868	0.0100202	3.94606	8.23659	10.8799	2.34773	0.101204	0.20341	78.8
2000	1309	99.7986	278.81	-1.26772e+06	38.6857	151.91	2.558	55.4367	0.132266	17.9962	0.710033	0.0100202	3.94591	8.23659	10.8799	2.34773	0.101204	0.20341	78.8
2000	1308	99.7986	278.714	-1.26788e+06	38.6833	151.91	2.563	55.4367	0.132266	17.9962	0.7102	0.0100202	3.94576	8.23659	10.8799	2.34773	0.101204	0.20341	78.8
2000	1307	99.7986	278.618	-1.26803e+06	38.6809	151.91	2.567	55.4366	0.132266	17.9962	0.710367	0.0100202	3.94561	8.23659	10.8799	2.34773	0.101204	0.20341	78.8
2000	1306	99.7986	278.521	-1.26818e+06	38.6785	151.91	2.572	55.4366	0.132266	17.9962	0.710536	0.0100202	3.94546	8.23659	10.8799	2.34773	0.101204	0.20341	78.8
2000	1305	99.7986	278.425	-1.26833e+06	38.6761	151.91	2.576	55.4366	0.132266	17.9962	0.710706	0.0100202	3.9453	8.23659	10.8799	2.34773	0.101204	0.20341	78.8
2000	1304	99.7987	278.329	-1.26849e+06	38.6737	151.91	2.581	55.4366	0.132266	17.9962	0.710876	0.0100202	3.94515	8.23658	10.8799	2.34773	0.101204	0.20341	78.8
2000	1303	99.7987	278.233	-1.26864e+06	38.6713	151.91	2.585	55.4366	0.132266	17.9962	0.711048	0.0100202	3.94499	8.23658	10.8799	2.34773	0.101204	0.20341	78.8
2000	1302	99.7987	278.136	-1.26879e+06	38.669	151.91	2.59	55.4366	0.132266	17.9962	0.711221	0.0100202	3.94484	8.23658	10.8799	2.34773	0.101204	0.203409	78.8
2000	1301	99.7987	278.04	-1.26894e+06	38.6666	151.91	2.594	55.4366	0.132266	17.9962	0.711395	0.0100202	3.94468	8.23658	10.8799	2.34773	0.101204	0.203409	78.8
2000	1300	99.7987	277.943	-1.26909e+06	38.6642	151.91	2.599	55.4366	0.132266	17.9962	0.71157	0.0100202	3.94452	8.23658	10.8799	2.34773	0.101204	0.203409	78.8
2000	1299	99.7987	277.847	-1.26925e+06	38.6618	151.91	2.603	55.4366	0.132266	17.9962	0.711746	0.0100202	3.94436	8.23658	10.8799	2.34773	0.101204	0.203409	78.8
2000	1298	99.7988	277.75	-1.2694e+06	38.6594	151.91	2.607	55.4366	0.132266	17.9962	0.711924	0.0100202	3.9442	8.23658	10.8799	2.34772	0.101204	0.203409	78.8
2000	1297	99.7988	277.654	-1.26955e+06	38.657	151.91	2.612	55.4366	0.132266	17.9962	0.712102	0.0100202	3.94404	8.23657	10.8799	2.34772	0.101204	0.203409	78.8
2000	1296	99.7988	277.557	-1.2697e+06	38.6546	151.91	2.616	55.4365	0.132266	17.9962	0.712282	0.0100202	3.94388	8.23657	10.8799	2.34772	0.101204	0.203409	78.8
2000	1295	99.7988	277.46	-1.26985e+06	38.6522	151.91	2.621	55.4365	0.132266	17.9962	0.712462	0.0100202	3.94372	8.23657	10.8799	2.34772	0.101204	0.203409	78.8
2000	1294	99.7988	277.363	-1.27001e+06	38.6498	151.91	2.625	55.4365	0.132266	17.9962	0.712644	0.0100202	3.94355	8.23657	10.8799	2.34772	0.101204	0.203409	78.8
2000	1293	99.7988	277.266	-1.27016e+06	38.6474	151.91	2.63	55.4365	0.132266	17.9962	0.712827	0.0100202	3.94339	8.23657	10.8799	2.34772	0.101204	0.203409	78.8
2000	1292	99.7989	277.169	-1.27031e+06	38.6451	151.91	2.634	55.4365	0.132266	17.9962	0.71301	0.0100202	3.94322	8.23657	10.8799	2.34772	0.101204	0.203409	78.8
2000	1291	99.7989	277.072	-1.27046e+06	38.6427	151.91	2.639	55.4365	0.132266	17.9962	0.713196	0.0100202	3.94305	8.23657	10.8799	2.34772	0.101204	0.203409	78.8
2000	1290	99.7989	276.975	-1.27062e+06	38.6403	151.91	2.644	55.4365	0.132266	17.9962	0.713382	0.0100202	3.94288	8.23656	10.8799	2.34772	0.101204	0.203409	78.8
2000	1289	99.7989	276.878	-1.27077e+06	38.6379	151.91	2.648	55.4365	0.132266	17.9962	0.713569	0.0100201	3.94271	8.23656	10.8799	2.34772	0.101204	0.203409	78.8
2000	1288	99.7989	276.781	-1.27092e+06	38.6355	151.91	2.653	55.4365	0.132266	17.9962	0.713757	0.0100201	3.94254	8.23656	10.8799	2.34772	0.101203	0.203409	78.8
2000	1287	99.799	276.683	-1.27107e+06	38.6331	151.91	2.657	55.4365	0.132266	17.9962	0.713947	0.0100201	3.94237	8.23656	10.8799	2.34772	0.101203	0.203409	78.8
2000	1286	99.799	276.586	-1.27122e+06	38.6307	151.91	2.662	55.4364	0.132266	17.9962	0.714137	0.0100201	3.9422	8.23656	10.8799	2.34772	0.101203	0.203409	78.8
2000	1285	99.799	276.489	-1.27138e+06	38.6283	151.91	2.666	55.4364	0.132266	17.9962	0.714329	0.0100201	3.94203	8.23656	10.8799	2.34772	0.101203	0.203409	78.8
2000	1284	99.799	276.391	-1.27153e+06	38.626	151.91	2.671	55.4364	0.132266	17.9962	0.714522	0.0100201	3.94185	8.23655	10.8799	2.34772	0.101203	0.203409	78.8
2000	1283	99.799	276.294	-1.27168e+06	38.6236	151.91	2.675	55.4364	0.132266	17.9962	0.714716	0.0100201	3.94168	8.23655	10.8799	2.34772	0.101203	0.203409	78.8
2000	1282	99.7991	276.196	-1.27183e+06	38.6212	151.91	2.68	55.4364	0.132266	17.9962	0.714912	0.0100201	3.9415	8.23655	10.8799	2.34772	0.101203	0.203409	78.8
2000	1281	99.7991	276.098	-1.27198e+06	38.6188	151.91	2.685	55.4364	0.132266	17.9962	0.715108	0.0100201	3.94132	8.23655	10.8799	2.34772	0.101203	0.203409	78.8
2000	1280	99.7991	276.001	-1.27214e+06	38.6164	151.91	2.689	55.4364	0.132266	17.9962	0.715305	0.0100201	3.94114	8.23655	10.8799	2.34772	0.101203	0.203409	78.8
2000	1279	99.7991	275.903	-1.27229e+06	38.614	151.91	2.694	55.4364	0.132266	17.9962	0.715504	0.0100201	3.94096	8.23655	10.8799	2.34772	0.101203	0.203409	78.8
2000	1278	99.7991	275.805	-1.27244e+06	38.6116	151.91	2.698	55.4364	0.132266	17.9961	0.715704	0.0100201	3.94078	8.23654	10.8799	2.34772	0.101203	0.203409	78.8
2000	1277	99.7992	275.707	-1.27259e+06	38.6092	151.91	2.703	55.4363	0.132266	17.9961	0.715905	0.0100201	3.9406	8.23654	10.8799	2.34772	0.101203	0.203409	78.8
2000	1276	99.7992	275.609	-1.27275e+06	38.6069	151.91	2.708	55.4363	0.132266	17.9961	0.716107	0.0100201	3.94042	8.23654	10.8798	2.34771	0.101203	0.203408	78.8
2000	1275	99.7992	275.511	-1.2729e+06	38.6045	151.91	2.712	55.4363	0.132266	17.9961	0.716311	0.0100201	3.94024	8.23654	10.8798	2.34771	0.101203	0.203408	78.8
2000	1274	99.7992	275.413	-1.27305e+06	38.6021	151.91	2.717	55.4363	0.132266	17.9961	0.716515	0.0100201	3.94005	8.23654	10.8798	2.34771	0.101203	0.203408	78.8
2000	1273	99.7992	275.315	-1.2732e+06	38.5997	151.91	2.721	55.4363	0.132266	17.9961	0.716721	0.0100201	3.93986	8.23654	10.8798	2.34771	0.101203	0.203408	78.8
2000	1272	99.7993	275.216	-1.27335e+06	38.5973	151.91	2.726	55.4363	0.132266	17.9961	0.716928	0.0100201	3.93968	8.23653	10.8798	2.34771	0.101203	0.203408	78.8
2000	1271	99.7993	275.118	-1.27351e+06	38.5949	151.91	2.731	55.4363	0.132265	17.9961	0.717136	0.0100201	3.93949	8.23653	10.8798	2.34771	0.101203	0.203408	78.8
2000	1270	99.7993	275.02	-1.27366e+06	38.5925	151.91	2.735	55.4363	0.132265	17.9961	0.717345	0.0100201	3.9393	8.23653	10.8798	2.34771	0.101203	0.203408	78.8
2000	1269	99.7993	274.921	-1.27381e+06	38.5901	151.91	2.74	55.4363	0.132265	17.9961	0.717555	0.0100201	3.93911	8.23653	10.8798	2.34771	0.101203	0.203408	78.8
2000	1268	99.7993	274.823	-1.27396e+06	38.5878	151.91	2.745	55.4362	0.132265	17.9961	0.717767	0.0100201	3.93892	8.23653	10.8798	2.34771	0.101203	0.203408	78.8
2000	1267	99.7994	274.724	-1.27412e+06	38.5854	151.91	2.749	55.4362	0.132265	17.9961	0.71798	0.0100201	3.93873	8.23653	10.8798	2.34771	0.101203	0.203408	78.8
2000	1266	99.7994	274.626	-1.27427e+06	38.583	151.91	2.754	55.4362	0.132265	17.9961	0.718194	0.0100201	3.93853	8.23652	10.8798	2.34771	0.101203	0.203408	78.8
2000	1265	99.7994	274.527	-1.27442e+06	38.5806	151.91	2.759	55.4362	0.132265	17.9961	0.718409	0.0100201	3.93834	8.23652	10.8798	2.34771	0.101203	0.203408	78.8
2000	1264	99.7994	274.428	-1.27457e+06	38.5782	151.91	2.763	55.4362	0.132265	17.9961	0.718626	0.0100201	3.93814	8.23652	10.8798	2.34771	0.101203	0.203408	78.8
2000	1263	99.7994	274.329	-1.27472e+06	38.5758	151.91	2.768	55.4362	0.132265	17.9961	0.718843	0.0100201	3.93794	8.23652	10.8798	2.34771	0.101203	0.203408	78.8
2000	1262	99.7995	274.23	-1.27488e+06	38.5734	151.91	2.773	55.4362	0.132265	17.9961	0.719062	0.0100201	3.93775	8.23652	10.8798	2.34771	0.101203	0.203408	78.8
2000	1261	99.7995	274.132	-1.27503e+06	38.5711	151.91	2.777	55.4362	0.132265	17.9961	0.719283	0.0100201	3.93755	8.23652	10.8798	2.34771	0.101203	0.203408	78.8
2000	1260	99.7995	274.033	-1.27518e+06	38.5687	151.91	2.782	55.4361	0.132265	17.9961	0.719504	0.0100201	3.93735	8.23651	10.8798	2.34771	0.101203	0.203408	78.8
2000	1259	99.7995	273.933	-1.27533e+06	38.5663	151.91	2.787	55.4361	0.132265	17.9961	0.719726	0.0100201	3.93715	8.23651	10.8798	2.34771	0.101203	0.203408	78.8
2000	1258	99.7996	273.834	-1.27549e+06	38.5639	151.91	2.792	55.4361	0.132265	17.9961	0.71995	0.0100201	3.93694	8.23651	10.8798	2.34771	0.101203	0.203408	78.9
2000	1257	99.7996	273.735	-1.27564e+06	38.5615	151.91	2.796	55.4361	0.132265	17.9961	0.720175	0.0100201	3.93674	8.23651	10.8798	2.34771	0.101203	0.203408	78.9
2000	1256	99.7996	273.636	-1.27579e+06	38.5591	151.91	2.801	55.4361	0.132265	17.9961	0.720402	0.0100201	3.93654	8.23651	10.8798	2.3477	0.101203	0.203408	78.9
2000	1255	99.7996	273.537	-1.27594e+06	38.5568	151.91	2.806	55.4361	0.132265	17.9961	0.720629	0.0100201	3.93633	8.2365	10.8798	2.3477	0.101203	0.203408	78.9
2000	1254	99.7996	273.437	-1.27609e+06	38.5544	151.91	2.811	55.4361	0.132265	17.9961	0.720858	0.0100201	3.93612	8.2365	10.8798	2.3477	0.101203	0.203408	78.9
2000	1253	99.7997	273.338	-1.27625e+06	38.552	151.91	2.815	55.4361	0.132265	17.9961	0.721088	0.0100201	3.93591	8.2365	10.8798	2.3477	0.101203	0.203407	78.9
2000	1252	99.7997	273.238	-1.2764e+06	38.5496	151.91	2.82	55.436	0.132265	17.996	0.721319	0.0100201	3.93571	8.2365	10.8798	2.3477	0.101203	0.203407	78.9
2000	1251	99.7997	273.139	-1.27655e+06	38.5472	151.91	2.825	55.436	0.132265	17.996	0.721552	0.0100201	3.93549	8.2365	10.8798	2.3477	0.101203	0.203407	78.9
2000	1250	99.7997	273.039	-1.2767e+06	38.5448	151.91	2.83	55.436	0.132265	17.996	0.721786	0.0100201	3.93528	8.23649	10.8798	2.3477	0.101203	0.203407	78.9
2000	1249	99.7998	272.939	-1.27686e+06	38.5425	151.91	2.834	55.436	0.132265	17.996	0.722021	0.0100201	3.93507	8.23649	10.8798	2.3477	0.101203	0.203407	78.9
2000	1248	99.7998	272.839	-1.27701e+06	38.5401	151.91	2.839	55.436	0.132265	17.996	0.722257	0.0100201	3.93486	8.23649	10.8798	2.3477	0.101203	0.203407	78.9
2000	1247	99.7998	272.74	-1.27716e+06	38.5377	151.91	2.844	55.436	0.132265	17.996	0.722495	0.0100201	3.93464	8.23649	10.8798	2.3477	0.101203	0.203407	78.9
2000	1246	99.7998	272.64	-1.27731e+06	38.5353	151.91	2.849	55.436	0.132265	17.996	0.722734	0.0100201	3.93443	8.23649	10.8798	2.3477	0.101203	0.203407	78.9
2000	1245	99.7999	272.54	-1.27746e+06	38.5329	151.911	2.854	55.4359	0.132265	17.996	0.722974	0.0100201	3.93421	8.23648	10.8798	2.3477	0.101203	0.203407	78.9
2000	1244	99.7999	272.44	-1.27762e+06	38.5305	151.911	2.858	55.4359	0.132265	17.996	0.723216	0.0100201	3.93399	8.23648	10.8798	2.3477	0.101203	0.203407	78.9
2000	1243	99.7999	272.339	-1.27777e+06	38.5282	151.911	2.863	55.4359	0.132265	17.996	0.723459	0.01002	3.93377	8.23648	10.8798	2.3477	0.101202	0.203407	78.9
2000	1242	99.7999	272.239	-1.27792e+06	38.5258	151.911	2.868	55.4359	0.132265	17.996	0.723703	0.01002	3.93355	8.23648	10.8798	2.3477	0.101202	0.203407	78.9
2000	1241	99.8	272.139	-1.27807e+06	38.5234	151.911	2.873	55.4359	0.132265	17.996	0.723948	0.01002	3.93333	8.23648	10.8798	2.3477	0.101202	0.203407	78.9
2000	1240	99.8	272.039	-1.27823e+06	38.521	151.911	2.878	55.4359	0.132265	17.996	0.724195	0.01002	3.9331	8.23647	10.8798	2.3477	0.101202	0.203407	78.9
2000	1239	99.8	271.938	-1.27838e+06	38.5186	151.911	2.882	55.4359	0.132265	17.996	0.724443	0.01002	3.93288	8.23647	10.8798	2.3477	0.101202	0.203407	78.9
2000	1238	99.8	271.838	-1.27853e+06	38.5162	151.911	2.887	55.4359	0.132264	17.996	0.724692	0.01002	3.93265	8.23647	10.8798	2.34769	0.101202	0.203407	78.9
2000	1237	99.8001	271.737	-1.27868e+06	38.5139	151.911	2.892	55.4358	0.132264	17.996	0.724943	0.01002	3.93243	8.23647	10.8798	2.34769	0.101202	0.203407	78.9
2000	1236	99.8001	271.637	-1.27884e+06	38.5115	151.911	2.897	55.4358	0.132264	17.996	0.725195	0.01002	3.9322	8.23647	10.8798	2.34769	0.101202	0.203407	78.9
2000	1235	99.8001	271.536	-1.27899e+06	38.5091	151.911	2.902	55.4358	0.132264	17.996	0.725448	0.01002	3.93197	8.23646	10.8797	2.34769	0.101202	0.203407	78.9
2000	1234	99.8001	271.435	-1.27914e+06	38.5067	151.911	2.907	55.4358	0.132264	17.996	0.725703	0.01002	3.93174	8.23646	10.8797	2.34769	0.101202	0.203407	78.9
2000	1233	99.8002	271.335	-1.27929e+06	38.5043	151.911	2.912	55.4358	0.132264	17.996	0.725959	0.01002	3.93151	8.23646	10.8797	2.34769	0.101202	0.203406	78.9
2000	1232	99.5469	270.545	-1.27624e+06	38.4099	151.488	2.922	55.4349	0.132571	18.0352	0.725483	0.0100455	3.92394	8.17602	10.9029	2.35362	0.10146	0.203924	78.8
2000	1231	99.4001	270.044	-1.27454e+06	38.3542	151.242	2.93	55.4344	0.13275	18.058	0.725308	0.0100604	3.9194	8.14087	10.9163	2.35707	0.10161	0.204225	78.7
2000	1230	99.2539	269.546	-1.27284e+06	38.2986	150.998	2.938	55.4339	0.132928	18.0808	0.725129	0.0100752	3.91484	8.10581	10.9297	2.36051	0.101759	0.204526	78.7
2000	1229	97.7325	265.335	-1.25307e+06	37.7198	148.613	2.95	55.4999	0.134931	18.0231	0.730325	0.010232	3.93618	8.04857	10.9329	2.37298	0.103236	0.20771	78.5
2000	1228	95.6492	259.609	-1.22591e+06	36.927	145.355	2.963	55.5961	0.137781	17.9285	0.737954	0.0104549	3.9691	7.98166	10.9315	2.38934	0.105325	0.212234	78.2
2000	1227	93.6611	254.145	-1.2e+06	36.1704	142.246	2.977	55.6915	0.140618	17.8349	0.745482	0.0106768	4.00137	7.91562	10.9303	2.40536	0.107402	0.216739	77.9
2000	1226	91.7619	248.925	-1.17526e+06	35.4476	139.277	2.99	55.7859	0.143444	17.7423	0.752913	0.0108978	4.03303	7.8504	10.9294	2.42104	0.109466	0.221225	77.6
2000	1225	89.9455	243.931	-1.1516e+06	34.7562	136.439	3.004	55.8795	0.146258	17.6506	0.760248	0.0111178	4.06407	7.78598	10.9287	2.4364	0.111518	0.225692	77.3
2000	1224	88.2067	239.15	-1.12895e+06	34.0944	133.722	3.017	55.9722	0.149061	17.5598	0.76749	0.011337	4.09452	7.72234	10.9282	2.45146	0.113558	0.230141	77.1
2000	1223	86.5404	234.568	-1.10726e+06	33.4601	131.119	3.03	56.0641	0.151852	17.4698	0.774641	0.0115553	4.1244	7.65944	10.9278	2.46621	0.115586	0.234573	76.8
2000	1222	84.9422	230.173	-1.08646e+06	32.8517	128.623	3.043	56.1552	0.154632	17.3808	0.781704	0.0117727	4.15371	7.59728	10.9277	2.48068	0.117602	0.238986	76.5
2000	1221	83.4079	225.953	-1.0665e+06	32.2676	126.228	3.056	56.2455	0.157401	17.2926	0.78868	0.0119893	4.18248	7.53582	10.9278	2.49488	0.119607	0.243382	76.2
2000	1220	81.9337	221.898	-1.04732e+06	31.7063	123.927	3.069	56.335	0.160159	17.2052	0.795572	0.012205	4.21071	7.47504	10.928	2.50881	0.121601	0.247761	76
2000	1219	80.5161	217.997	-1.02889e+06	31.1666	121.715	3.082	56.4238	0.162907	17.1186	0.802382	0.0124199	4.23842	7.41493	10.9284	2.52248	0.123584	0.252123	75.7
2000	1218	79.1518	214.244	-1.01115e+06	30.6471	119.586	3.094	56.5119	0.165645	17.0328	0.809111	0.0126339	4.26562	7.35546	10.9289	2.53591	0.125556	0.256469	75.4
2000	1217	77.8378	210.628	-994074	30.1468	117.537	3.107	56.5993	0.168373	16.9478	0.815762	0.0128472	4.29232	7.29662	10.9296	2.5491	0.127518	0.260799	75.2
2000	1216	76.5713	207.142	-977619	29.6645	115.562	3.12	56.6861	0.17109	16.8635	0.822335	0.0130597	4.31854	7.23839	10.9304	2.56205	0.129469	0.265112	74.9
2000	1215	75.3498	203.78	-961752	29.1994	113.658	3.132	56.7722	0.173798	16.78	0.828832	0.0132714	4.34428	7.18074	10.9313	2.57479	0.13141	0.26941	74.7
2000	1214	74.1708	200.534	-946442	28.7504	111.82	3.144	56.8576	0.176497	16.6972	0.835256	0.0134824	4.36956	7.12367	10.9324	2.5873	0.133341	0.273693	74.4
2000	1213	73.0321	197.399	-931659	28.3167	110.046	3.157	56.9424	0.179186	16.6152	0.841607	0.0136926	4.39438	7.06716	10.9335	2.59962	0.135263	0.27796	74.1
2000	1212	71.9316	194.368	-917377	27.8976	108.331	3.169	57.0267	0.181866	16.5338	0.847887	0.0139021	4.41875	7.0112	10.9348	2.61172	0.137175	0.282212	73.9
2000	1211	70.8675	191.438	-903570	27.4923	106.674	3.181	57.1103	0.184537	16.4531	0.854097	0.0141108	4.44269	6.95576	10.9362	2.62364	0.139078	0.28645	73.6
2000	1210	69.8378	188.602	-890213	27.1001	105.07	3.194	57.1934	0.187199	16.3731	0.860239	0.0143189	4.46621	6.90084	10.9377	2.63536	0.140971	0.290674	73.4
2000	1209	68.3839	184.646	-871593	26.5538	102.806	3.216	57.3156	0.190801	16.367	0.864356	0.0146233	4.49465	6.80892	10.8411	2.66238	0.143805	0.296853	73
2000	1208	67.171	181.332	-856001	26.096	100.918	3.234	57.4209	0.194	16.3313	0.86916	0.0148874	4.52042	6.73343	10.7847	2.68271	0.146242	0.302214	72.6
2000	1207	66.0057	178.147	-841023	25.6561	99.1051	3.252	57.5255	0.197182	16.2956	0.873874	0.0151502	4.54569	6.65907	10.729	2.70268	0.148663	0.307549	72.3
2000	1206	64.885	175.086	-826621	25.233	94.2136	3.27	57.6294	0.200345	16.26	0.878499	0.0154119	4.57047	6.58579	10.6739	2.7223	0.151071	0.312861	72
2000	1205	63.8063	172.139	-812762	24.8257	92.5723	3.288	57.7325	0.203491	16.2245	0.883039	0.0156724	4.59477	6.51357	10.6193	2.74156	0.153465	0.31815	71.6
2000	1204	62.7674	169.3	-799416	24.4334	90.992	3.306	57.8349	0.20662	16.1889	0.887497	0.0159318	4.61861	6.44239	10.5653	2.76049	0.155846	0.323416	71.3
2000	1203	61.766	166.564	-786556	24.0552	89.4692	3.324	57.9367	0.209732	16.1534	0.891874	0.0161901	4.64199	6.37222	10.5119	2.77909	0.158213	0.32866	71
2000	1202	60.8	163.923	-774154	23.6903	88.0009	3.341	58.0377	0.212827	16.118	0.896173	0.0164474	4.66495	6.30304	10.4591	2.79737	0.160567	0.333881	70.6
2000	1201	59.8677	161.375	-762186	23.3381	86.5842	3.359	58.1381	0.215907	16.0825	0.900397	0.0167035	4.68747	6.23482	10.4068	2.81533	0.162909	0.339081	70.3
2000	1200	58.9672	158.913	-750631	22.9979	85.2163	3.376	58.2378	0.21897	16.0471	0.904547	0.0169586	4.70958	6.16755	10.355	2.83298	0.165237	0.344259	70
2000	1199	58.097	156.533	-739465	22.6691	83.8948	3.393	58.3369	0.222018	16.0117	0.908626	0.0172126	4.73129	6.1012	10.3037	2.85034	0.167554	0.349416	69.7
2000	1198	57.2554	154.231	-728670	22.3511	82.6173	3.41	58.4354	0.22505	15.9764	0.912635	0.0174656	4.75259	6.03575	10.2529	2.8674	0.169858	0.354552	69.3
2000	1197	56.4228	151.956	-718026	22.0369	81.3558	3.428	58.5369	0.228135	15.9416	0.915822	0.0177233	4.76904	5.97119	10.2028	2.88476	0.172204	0.359784	69
2000	1196	55.6066	149.725	-707591	21.7289	80.1194	3.446	58.6391	0.231254	15.9048	0.918986	0.0179835	4.78474	5.90597	10.1557	2.90191	0.174567	0.365065	68.7
2000	1195	54.8169	147.567	-697498	21.4309	78.9237	3.463	58.7406	0.234357	15.868	0.922094	0.0182426	4.80012	5.84165	10.1089	2.91876	0.176918	0.370324	68.4
2000	1194	54.0525	145.477	-687730	21.1423	77.7667	3.481	58.8414	0.237445	15.8313	0.925149	0.0185005	4.81519	5.77821	10.0626	2.93533	0.179257	0.375561	68.1
2000	1193	53.3122	143.453	-678272	20.8629	76.6465	3.498	58.9416	0.240516	15.7946	0.928151	0.0187574	4.82997	5.71563	10.0168	2.95163	0.181582	0.380776	67.8
2000	1192	52.5949	141.491	-669109	20.592	75.5614	3.515	59.0411	0.243572	15.758	0.931103	0.0190133	4.84446	5.65389	9.97135	2.96764	0.183896	0.385969	67.5
2000	1191	51.8994	139.589	-660227	20.3294	74.5097	3.532	59.14	0.246612	15.7214	0.934005	0.019268	4.85866	5.59298	9.92633	2.98339	0.186197	0.391141	67.2
2000	1190	51.2248	137.743	-651614	20.0746	73.4898	3.549	59.2384	0.249637	15.6848	0.936859	0.0195218	4.87259	5.53288	9.88172	2.99888	0.188486	0.396293	66.9
2000	1189	50.5701	135.952	-643256	19.8273	72.5004	3.566	59.3361	0.252648	15.6482	0.939667	0.0197745	4.88625	5.47357	9.83751	3.0141	0.190763	0.401423	66.6
2000	1188	49.9344	134.212	-635143	19.5871	71.5401	3.583	59.4332	0.255643	15.6117	0.94243	0.0200263	4.89965	5.41503	9.79369	3.02908	0.193029	0.406533	66.3
2000	1187	49.3169	132.522	-627263	19.3538	70.6075	3.6	59.5298	0.258625	15.5752	0.945149	0.020277	4.91279	5.35726	9.75026	3.04381	0.195283	0.411623	66
2000	1186	48.7169	130.879	-619608	19.1271	69.7015	3.617	59.6257	0.261592	15.5387	0.947824	0.0205268	4.92568	5.30023	9.70721	3.05829	0.197526	0.416693	65.7
2000	1185	48.1335	129.282	-612166	18.9066	68.821	3.633	59.7211	0.264545	15.5023	0.950458	0.0207756	4.93834	5.24393	9.66452	3.07254	0.199758	0.421744	65.4
2000	1184	47.5661	127.728	-604930	18.6921	67.9648	3.65	59.816	0.267484	15.4658	0.953052	0.0210234	4.95075	5.18835	9.62221	3.08655	0.201978	0.426775	65.1
2000	1183	47.0139	126.215	-597890	18.4834	67.1319	3.666	59.9103	0.27041	15.4295	0.955605	0.0212703	4.96294	5.13347	9.58025	3.10033	0.204188	0.431787	64.8
2000	1182	46.4765	124.743	-591039	18.2802	66.3215	3.683	60.0041	0.273322	15.3931	0.95812	0.0215162	4.9749	5.07928	9.53865	3.11389	0.206387	0.43678	64.5
2000	1181	45.9532	123.309	-584368	18.0823	65.5326	3.699	60.0973	0.276221	15.3568	0.960598	0.0217613	4.98663	5.02576	9.49739	3.12722	0.208575	0.441754	64.2
2000	1180	45.4433	121.912	-577871	17.8895	64.7642	3.715	60.19	0.279107	15.3205	0.963038	0.0220054	4.99816	4.97291	9.45648	3.14034	0.210753	0.44671	63.9
2000	1179	44.9465	120.55	-571542	17.7015	64.0157	3.732	60.2822	0.28198	15.2842	0.965443	0.0222487	5.00947	4.9207	9.4159	3.15325	0.21292	0.451648	63.6
2000	1178	44.4622	119.222	-565372	17.5183	63.2863	3.748	60.3739	0.28484	15.248	0.967813	0.022491	5.02057	4.86914	9.37565	3.16595	0.215078	0.456567	63.3
2000	1177	43.9899	117.926	-559357	17.3396	62.5752	3.764	60.4651	0.287688	15.2118	0.970149	0.0227325	5.03148	4.8182	9.33573	3.17844	0.217225	0.461469	63
2000	1176	43.5292	116.663	-553490	17.1652	61.8816	3.78	60.5558	0.290524	15.1757	0.972451	0.0229731	5.04219	4.76788	9.29612	3.19073	0.219362	0.466354	62.7
2000	1175	43.0796	115.429	-547766	16.9951	61.2051	3.796	60.646	0.293347	15.1395	0.974721	0.0232129	5.0527	4.71816	9.25683	3.20282	0.22149	0.471221	62.4
2000	1174	42.6407	114.225	-542179	16.8289	60.5449	3.811	60.7357	0.296158	15.1034	0.976959	0.0234518	5.06302	4.66904	9.21786	3.21471	0.223607	0.476071	62.1
2000	1173	42.2121	113.049	-536726	16.6667	59.9004	3.827	60.8249	0.298958	15.0674	0.979167	0.0236899	5.07316	4.6205	9.17918	3.22641	0.225716	0.480904	61.9
2000	1172	41.7936	111.9	-531399	16.5082	59.2711	3.843	60.9137	0.301745	15.0313	0.981343	0.0239271	5.08312	4.57253	9.14081	3.23793	0.227814	0.485721	61.6
2000	1171	41.3846	110.777	-526197	16.3533	58.6564	3.859	61.002	0.304522	14.9953	0.98349	0.0241636	5.0929	4.52513	9.10273	3.24926	0.229904	0.490521	61.3
2000	1170	40.9849	109.679	-521113	16.2019	58.0558	3.874	61.0899	0.307287	14.9594	0.985608	0.0243992	5.10251	4.47827	9.06495	3.2604	0.231984	0.495305	61
2000	1169	40.5941	108.606	-516143	16.0539	57.4689	3.89	61.1773	0.31004	14.9234	0.987698	0.0246341	5.11194	4.43196	9.02745	3.27137	0.234055	0.500072	60.7
2000	1168	40.212	107.557	-511285	15.9091	56.8951	3.905	61.2643	0.312783	14.8876	0.98976	0.0248682	5.12121	4.38619	8.99023	3.28216	0.236117	0.504824	60.4
2000	1167	39.8383	106.53	-506534	15.7675	56.334	3.92	61.3508	0.315514	14.8517	0.991794	0.0251015	5.13031	4.34094	8.9533	3.29277	0.238171	0.50956	60.1
2000	1166	39.4726	105.525	-501886	15.6289	55.7852	3.936	61.437	0.318235	14.8159	0.993802	0.025334	5.13925	4.29621	8.91664	3.30322	0.240215	0.51428	59.8
2000	1165	39.1148	104.541	-497338	15.4933	55.2483	3.951	61.5226	0.320945	14.7801	0.995784	0.0255658	5.14803	4.25198	8.88025	3.31349	0.242251	0.518986	59.5
2000	1164	38.7645	103.578	-492888	15.3605	54.7229	3.966	61.6079	0.323644	14.7443	0.997741	0.0257968	5.15666	4.20826	8.84413	3.3236	0.244278	0.523676	59.2
2000	1163	38.4215	102.635	-488530	15.2304	54.2085	3.981	61.6927	0.326333	14.7086	0.999672	0.0260271	5.16513	4.16503	8.80827	3.33355	0.246297	0.528351	58.9
2000	1162	38.0855	101.711	-484264	15.1031	53.7049	3.996	61.7772	0.329012	14.6729	1.00158	0.0262567	5.17346	4.12228	8.77267	3.34333	0.248307	0.533011	58.6
2000	1161	37.7565	100.806	-480085	14.9782	53.2118	4.012	61.8612	0.331681	14.6373	1.00346	0.0264855	5.18163	4.08	8.73733	3.35296	0.250309	0.537656	58.4
2000	1160	37.434	99.9184	-475991	14.8559	52.7287	4.026	61.9448	0.334339	14.6017	1.00532	0.0267137	5.18966	4.0382	8.70224	3.36243	0.252303	0.542287	58.1
2000	1159	37.118	99.0488	-471979	14.7361	52.2554	4.041	62.0281	0.336988	14.5661	1.00716	0.0269411	5.19755	3.99685	8.6674	3.37175	0.254289	0.546904	57.8
2000	1158	36.8082	98.1961	-468048	14.6185	51.7915	4.056	62.1109	0.339626	14.5305	1.00897	0.0271678	5.2053	3.95596	8.63281	3.38091	0.256267	0.551507	57.5
2000	1157	36.5045	97.3599	-464193	14.5032	51.3369	4.071	62.1934	0.342255	14.495	1.01076	0.0273939	5.21291	3.91551	8.59846	3.38993	0.258237	0.556096	57.2
2000	1156	36.2067	96.5397	-460414	14.3902	50.8911	4.086	62.2755	0.344875	14.4596	1.01253	0.0276192	5.22038	3.8755	8.56435	3.3988	0.260199	0.56067	56.9
2000	1155	35.9145	95.735	-456708	14.2793	50.454	4.101	62.3572	0.347485	14.4242	1.01428	0.0278439	5.22772	3.83593	8.53048	3.40752	0.262153	0.565232	56.6
2000	1154	35.6278	94.9453	-453072	14.1705	50.0252	4.115	62.4386	0.350086	14.3888	1.01601	0.0280679	5.23493	3.79678	8.49684	3.4161	0.2641	0.569779	56.3
2000	1153	35.3465	94.1703	-449505	14.0636	49.6046	4.13	62.5195	0.352677	14.3534	1.01771	0.0282913	5.24201	3.75805	8.46343	3.42454	0.266039	0.574314	56.1
2000	1152	35.0705	93.4095	-446005	13.9588	49.1919	4.144	62.6001	0.355259	14.3181	1.0194	0.028514	5.24896	3.71973	8.43025	3.43284	0.267971	0.578835	55.8
2000	1151	34.7994	92.6624	-442569	13.8558	48.7869	4.159	62.6804	0.357832	14.2828	1.02106	0.0287361	5.25578	3.68182	8.3973	3.44101	0.269895	0.583343	55.5
2000	1150	34.5333	91.9288	-439196	13.7547	48.3893	4.173	62.7603	0.360397	14.2476	1.02271	0.0289575	5.26248	3.64431	8.36456	3.44904	0.271812	0.587838	55.2
2000	1149	34.272	91.2082	-435885	13.6555	47.999	4.188	62.8399	0.362952	14.2124	1.02434	0.0291783	5.26906	3.6072	8.33205	3.45693	0.273721	0.59232	54.9
2000	1148	34.0153	90.5002	-432633	13.5579	47.6157	4.202	62.9191	0.365499	14.1772	1.02595	0.0293985	5.27552	3.57047	8.29976	3.4647	0.275624	0.59679	54.6
2000	1147	33.7632	89.8046	-429438	13.4621	47.2392	4.216	62.9979	0.368037	14.1421	1.02754	0.0296181	5.28186	3.53413	8.26768	3.47234	0.277519	0.601247	54.3
2000	1146	33.5154	89.1209	-426300	13.3679	46.8694	4.23	63.0765	0.370566	14.107	1.02911	0.029837	5.28808	3.49816	8.23581	3.47984	0.279408	0.605692	54.1
2000	1145	33.2719	88.449	-423217	13.2753	46.5061	4.245	63.1547	0.373087	14.072	1.03066	0.0300554	5.29419	3.46257	8.20415	3.48723	0.281289	0.610125	53.8
2000	1144	33.0326	87.7883	-420186	13.1843	46.1492	4.259	63.2325	0.3756	14.037	1.0322	0.0302732	5.30018	3.42734	8.17269	3.49448	0.283164	0.614545	53.5
2000	1143	32.7973	87.1388	-417208	13.0948	45.7983	4.273	63.3101	0.378104	14.002	1.03371	0.0304903	5.30606	3.39247	8.14145	3.50162	0.285032	0.618954	53.2
2000	1142	32.566	86.4999	-414280	13.0068	45.4534	4.287	63.3873	0.3806	13.9671	1.03521	0.0307069	5.31182	3.35797	8.1104	3.50863	0.286893	0.62335	52.9
2000	1141	32.3385	85.8716	-411401	12.9203	45.1144	4.301	63.4642	0.383088	13.9322	1.0367	0.0309229	5.31748	3.32381	8.07955	3.51553	0.288747	0.627735	52.6
2000	1140	32.1147	85.2535	-408571	12.8352	44.781	4.315	63.5408	0.385568	13.8974	1.03816	0.0311384	5.32303	3.29	8.04891	3.52231	0.290595	0.632109	52.4
2000	1139	31.8946	84.6454	-405786	12.7514	44.4531	4.329	63.6171	0.38804	13.8626	1.03962	0.0313532	5.32847	3.25653	8.01845	3.52897	0.292437	0.63647	52.1
2000	1138	31.6781	84.0469	-403048	12.669	44.1307	4.343	63.693	0.390505	13.8278	1.04105	0.0315675	5.3338	3.22339	7.98819	3.53551	0.294272	0.640821	51.8
2000	1137	31.465	83.458	-400353	12.5879	43.8134	4.356	63.7687	0.392961	13.7931	1.04247	0.0317813	5.33903	3.19059	7.95812	3.54195	0.2961	0.64516	51.5
2000	1136	31.2554	82.8782	-397702	12.5081	43.5013	4.37	63.8441	0.39541	13.7584	1.04387	0.0319945	5.34416	3.15812	7.92824	3.54827	0.297922	0.649489	51.2
2000	1135	31.049	82.3075	-395093	12.4295	43.1942	4.384	63.9191	0.397851	13.7238	1.04526	0.0322072	5.34918	3.12597	7.89855	3.55448	0.299738	0.653806	51
2000	1134	30.8458	81.7455	-392525	12.3521	42.892	4.398	63.9939	0.400285	13.6892	1.04663	0.0324193	5.3541	3.09414	7.86904	3.56058	0.301548	0.658112	50.7
2000	1133	30.6458	81.1921	-389997	12.2759	42.5944	4.411	64.0684	0.402711	13.6547	1.04799	0.0326309	5.35892	3.06262	7.83972	3.56657	0.303352	0.662408	50.4
2000	1132	30.4488	80.6471	-387508	12.2009	42.3016	4.425	64.1426	0.405129	13.6202	1.04933	0.032842	5.36365	3.03142	7.81058	3.57246	0.305149	0.666693	50.1
2000	1131	30.2548	80.1102	-385058	12.127	42.0132	4.439	64.2165	0.407541	13.5857	1.05065	0.0330526	5.36827	3.00052	7.78161	3.57824	0.306941	0.670967	49.8
2000	1130	30.0638	79.5814	-382645	12.0542	41.7293	4.452	64.2901	0.409945	13.5513	1.05197	0.0332626	5.37279	2.96992	7.75282	3.58392	0.308726	0.675231	49.6
2000	1129	29.8756	79.0603	-380268	11.9825	41.4497	4.466	64.3635	0.412342	13.5169	1.05326	0.0334721	5.37722	2.93962	7.72421	3.5895	0.310506	0.679485	49.3
2000	1128	29.6902	78.5468	-377927	11.9118	41.1743	4.479	64.4366	0.414732	13.4825	1.05455	0.0336812	5.38155	2.90961	7.69577	3.59497	0.31228	0.683728	49
2000	1127	29.5075	78.0407	-375621	11.8422	40.9029	4.492	64.5094	0.417115	13.4482	1.05582	0.0338897	5.38579	2.8799	7.66751	3.60035	0.314048	0.687961	48.7
2000	1126	29.3274	77.5419	-373348	11.7735	40.6357	4.506	64.5819	0.419491	13.414	1.05707	0.0340978	5.38993	2.85047	7.63941	3.60562	0.31581	0.692185	48.4
2000	1125	29.15	77.0502	-371109	11.7058	40.3723	4.519	64.6542	0.42186	13.3798	1.05832	0.0343053	5.39398	2.82132	7.61148	3.6108	0.317567	0.696398	48.2
2000	1124	28.9751	76.5654	-368902	11.6391	40.1128	4.532	64.7262	0.424222	13.3456	1.05954	0.0345124	5.39794	2.79246	7.58372	3.61588	0.319318	0.700601	47.9
2000	1123	28.8027	76.0875	-366727	11.5734	39.857	4.546	64.7979	0.426577	13.3115	1.06076	0.034719	5.40181	2.76387	7.55613	3.62087	0.321063	0.704795	47.6
2000	1122	28.6327	75.6161	-364583	11.5085	39.6049	4.559	64.8694	0.428926	13.2774	1.06196	0.0349251	5.40558	2.73555	7.52869	3.62576	0.322803	0.708979	47.3
2000	1121	28.4651	75.1512	-362469	11.4446	39.3564	4.572	64.9406	0.431268	13.2434	1.06315	0.0351307	5.40927	2.7075	7.50142	3.63056	0.324538	0.713154	47.1
2000	1120	28.2998	74.6927	-360385	11.3815	39.1113	4.585	65.0116	0.433603	13.2094	1.06432	0.0353359	5.41286	2.67972	7.47431	3.63527	0.326267	0.717319	46.8
2000	1119	28.1368	74.2404	-358330	11.3193	38.8697	4.598	65.0823	0.435932	13.1754	1.06549	0.0355407	5.41637	2.6522	7.44736	3.63989	0.32799	0.721475	46.5
2000	1118	27.976	73.7942	-356303	11.2579	38.6315	4.611	65.1528	0.438255	13.1415	1.06664	0.0357449	5.41979	2.62493	7.42057	3.64442	0.329709	0.725622	46.2
2000	1117	27.8174	73.3539	-354305	11.1973	38.3965	4.624	65.2231	0.440571	13.1076	1.06777	0.0359487	5.42312	2.59793	7.39393	3.64886	0.331422	0.729759	46
2000	1116	27.6609	72.9195	-352333	11.1376	38.1648	4.637	65.2931	0.44288	13.0738	1.0689	0.0361521	5.42636	2.57117	7.36744	3.65321	0.33313	0.733888	45.7
2000	1115	27.5065	72.4907	-350388	11.0786	37.9362	4.65	65.3628	0.445184	13.04	1.07001	0.0363551	5.42952	2.54467	7.34111	3.65748	0.334832	0.738008	45.4
2000	1114	27.3541	72.0675	-348469	11.0204	37.7107	4.663	65.4323	0.447481	13.0063	1.07111	0.0365575	5.43259	2.51841	7.31493	3.66166	0.33653	0.742118	45.2
2000	1113	27.2038	71.6498	-346575	10.963	37.4882	4.676	65.5016	0.449772	12.9726	1.0722	0.0367596	5.43557	2.4924	7.2889	3.66575	0.338223	0.74622	44.9
2000	1112	27.0554	71.2375	-344707	10.9063	37.2686	4.689	65.5707	0.452057	12.939	1.07327	0.0369612	5.43847	2.46663	7.26302	3.66976	0.33991	0.750313	44.6
2000	1111	26.9089	70.8303	-342862	10.8503	37.0519	4.702	65.6395	0.454336	12.9054	1.07434	0.0371625	5.44128	2.44109	7.23728	3.67369	0.341593	0.754398	44.3
2000	1110	26.7643	70.4284	-341042	10.795	36.8381	4.714	65.7081	0.456608	12.8718	1.07539	0.0373632	5.44401	2.41579	7.21169	3.67754	0.34327	0.758474	44.1
2000	1109	26.6215	70.0314	-339246	10.7405	36.627	4.727	65.7764	0.458875	12.8383	1.07643	0.0375636	5.44666	2.39072	7.18625	3.6813	0.344943	0.762541	43.8
2000	1108	26.4805	69.6394	-337472	10.6866	36.4187	4.74	65.8446	0.461136	12.8048	1.07746	0.0377636	5.44922	2.36588	7.16095	3.68499	0.346611	0.766601	43.5
2000	1107	26.3413	69.2522	-335721	10.6334	36.213	4.753	65.9125	0.463391	12.7714	1.07847	0.0379631	5.4517	2.34127	7.13579	3.6886	0.348274	0.770652	43.3
2000	1106	26.2039	68.8698	-333992	10.5808	36.0099	4.765	65.9802	0.46564	12.738	1.07948	0.0381623	5.4541	2.31688	7.11077	3.69213	0.349932	0.774694	43
2000	1105	26.0681	68.492	-332285	10.5289	35.8094	4.778	66.0477	0.467884	12.7047	1.08047	0.038361	5.45642	2.29272	7.08589	3.69558	0.351586	0.778729	42.7
2000	1104	25.934	68.1187	-330599	10.4776	35.6114	4.79	66.115	0.470122	12.6714	1.08145	0.0385594	5.45865	2.26877	7.06115	3.69895	0.353235	0.782756	42.4
2000	1103	25.8015	67.7499	-328933	10.4269	35.4158	4.803	66.1821	0.472353	12.6381	1.08242	0.0387182	5.46077	2.24503	7.03655	3.70226	0.35488	0.786776	42.2
2000	1102	25.67	67.3839	-327283	10.3766	35.2217	4.816	66.2501	0.474572	12.605	1.08329	0.0383466	5.46234	2.22137	7.01209	3.70556	0.356529	0.790807	41.9
2000	1101	25.5401	67.0223	-325653	10.327	35.03	4.828	66.3178	0.476784	12.5719	1.08415	0.0379767	5.46382	2.19793	6.98776	3.70879	0.358173	0.79483	41.7
2000	1100	25.4117	66.665	-324042	10.2779	34.8406	4.841	66.3854	0.47899	12.5389	1.085	0.0376084	5.46522	2.1747	6.96356	3.71195	0.359812	0.798845	41.4
2000	1099	25.2848	66.3118	-322451	10.2294	34.6535	4.854	66.4528	0.48119	12.5059	1.08583	0.0372418	5.46653	2.15168	6.9395	3.71504	0.361448	0.802853	41.1
2000	1098	25.1595	65.9627	-320880	10.1815	34.4686	4.866	66.5199	0.483385	12.473	1.08666	0.0368768	5.46777	2.12886	6.91556	3.71805	0.363079	0.806854	40.9
2000	1097	25.0356	65.6176	-319326	10.1341	34.286	4.879	66.5869	0.485574	12.4401	1.08747	0.0365134	5.46892	2.10624	6.89176	3.72099	0.364705	0.810847	40.6
2000	1096	24.9131	65.2765	-317792	10.0873	34.1056	4.891	66.6536	0.487757	12.4072	1.08827	0.0361517	5.46999	2.08383	6.86808	3.72387	0.366327	0.814832	40.3
2000	1095	24.7921	64.9392	-316275	10.041	33.9272	4.904	66.7202	0.489934	12.3744	1.08906	0.0357916	5.47099	2.06162	6.84454	3.72667	0.367945	0.81881	40.1
2000	1094	24.6724	64.6057	-314776	9.99522	33.751	4.916	66.7866	0.492106	12.3417	1.08984	0.0354332	5.4719	2.0396	6.82111	3.7294	0.369558	0.822781	39.8
2000	1093	24.5541	64.276	-313294	9.94997	33.5768	4.929	66.8528	0.494273	12.309	1.09061	0.0350764	5.47273	2.01778	6.79782	3.73207	0.371167	0.826744	39.5
2000	1092	24.4372	63.9499	-311829	9.90522	33.4046	4.941	66.9188	0.496434	12.2763	1.09137	0.0347212	5.47348	1.99615	6.77465	3.73467	0.372772	0.830701	39.3
2000	1091	24.3216	63.6275	-310381	9.86097	33.2344	4.953	66.9846	0.498589	12.2437	1.09212	0.0343677	5.47416	1.97471	6.7516	3.7372	0.374373	0.83465	39
2000	1090	24.2072	63.3086	-308950	9.8172	33.0661	4.966	67.0502	0.500739	12.2111	1.09285	0.0340159	5.47475	1.95346	6.72867	3.73967	0.37597	0.838592	38.8
2000	1089	24.0942	62.9931	-307534	9.77392	32.8997	4.978	67.1156	0.502883	12.1786	1.09357	0.0336657	5.47527	1.93239	6.70587	3.74207	0.377563	0.842528	38.5
2000	1088	23.9823	62.681	-306135	9.73111	32.7352	4.99	67.1809	0.505023	12.1461	1.09429	0.0333172	5.4757	1.91151	6.68319	3.74441	0.379151	0.846456	38.2
2000	1087	23.8717	62.3724	-304751	9.68877	32.5726	5.002	67.246	0.507157	12.1136	1.09499	0.0329703	5.47606	1.89082	6.66062	3.74669	0.380736	0.850378	38
2000	1086	23.7623	62.067	-303383	9.64687	32.4117	5.015	67.3109	0.509285	12.0812	1.09568	0.032625	5.47633	1.8703	6.63818	3.7489	0.382317	0.854293	37.7
2000	1085	23.6541	61.7648	-302029	9.60543	32.2527	5.027	67.3756	0.511408	12.0489	1.09636	0.0322814	5.47653	1.84996	6.61585	3.75105	0.383893	0.858202	37.5
2000	1084	23.5471	61.4658	-300690	9.56442	32.0953	5.039	67.4401	0.513526	12.0166	1.09703	0.0319394	5.47665	1.8298	6.59364	3.75314	0.385466	0.862103	37.2
2000	1083	23.4411	61.17	-299366	9.52385	31.9397	5.051	67.5045	0.515639	11.9843	1.09769	0.031599	5.47669	1.80982	6.57154	3.75516	0.387035	0.865999	37
2000	1082	23.3363	60.8772	-298056	9.4837	31.7858	5.063	67.5687	0.517747	11.9521	1.09833	0.0312603	5.47665	1.79001	6.54956	3.75713	0.3886	0.869888	36.7
2000	1081	23.2327	60.5874	-296761	9.44397	31.6335	5.075	67.6328	0.519849	11.9199	1.09897	0.0309232	5.47653	1.77037	6.5277	3.75904	0.390161	0.87377	36.5
2000	1080	23.1301	60.3006	-295479	9.40465	31.4828	5.088	67.6966	0.521947	11.8878	1.09959	0.0305877	5.47633	1.7509	6.50594	3.76089	0.391719	0.877646	36.2
2000	1079	23.0285	60.0167	-294210	9.36574	31.3338	5.1	67.7603	0.524039	11.8557	1.10021	0.0302538	5.47606	1.7316	6.4843	3.76268	0.393272	0.881516	35.9
2000	1078	22.928	59.7357	-292955	9.32722	31.1863	5.112	67.8239	0.526127	11.8237	1.10081	0.0299215	5.4757	1.71246	6.46278	3.76441	0.394822	0.88538	35.7
2000	1077	22.8285	59.4576	-291713	9.28909	31.0403	5.124	67.8873	0.528209	11.7917	1.1014	0.0295908	5.47526	1.69349	6.44136	3.76609	0.396369	0.889237	35.4
2000	1076	22.7301	59.1822	-290484	9.25135	30.8959	5.136	67.9505	0.530286	11.7598	1.10198	0.0292617	5.47475	1.67468	6.42005	3.76771	0.397912	0.893089	35.2
2000	1075	22.6326	58.9095	-289268	9.21398	30.753	5.148	68.0136	0.532358	11.7279	1.10255	0.0289342	5.47415	1.65603	6.39885	3.76927	0.399451	0.896934	34.9
2000	1074	22.5362	58.6395	-288064	9.17698	30.6115	5.159	68.0765	0.534426	11.6961	1.10311	0.0286083	5.47348	1.63755	6.37776	3.77078	0.400986	0.900774	34.7
2000	1073	22.4407	58.3722	-286872	9.14035	30.4715	5.171	68.1392	0.536488	11.6643	1.10365	0.0282839	5.47273	1.61922	6.35677	3.77223	0.402518	0.904608	34.4
2000	1072	22.3461	58.1075	-285693	9.10409	30.3329	5.183	68.2019	0.538546	11.6325	1.10419	0.0279611	5.47189	1.60105	6.3359	3.77363	0.404047	0.908436	34.2
2000	1071	22.2525	57.8453	-284526	9.06817	30.1957	5.195	68.2643	0.540598	11.6008	1.10471	0.0276399	5.47098	1.58303	6.31512	3.77497	0.405572	0.912258	33.9
2000	1070	22.1598	57.5857	-283370	9.03261	30.0599	5.207	68.3266	0.542646	11.5691	1.10522	0.0273202	5.46999	1.56517	6.29446	3.77627	0.407094	0.916075	33.7
2000	1069	22.068	57.3285	-282226	8.99738	29.9255	5.219	68.3888	0.544689	11.5375	1.10573	0.027002	5.46891	1.54746	6.2739	3.77751	0.408612	0.919886	33.4
2000	1068	21.977	57.0738	-281093	8.9625	29.7924	5.23	68.4508	0.546727	11.5059	1.10622	0.0266854	5.46776	1.5299	6.25344	3.77869	0.410127	0.923691	33.2
2000	1067	21.887	56.8215	-279971	8.92794	29.6605	5.242	68.5127	0.54876	11.4744	1.1067	0.0263702	5.46652	1.51249	6.23308	3.77983	0.411638	0.927491	32.9
2000	1066	21.7978	56.5715	-278860	8.89372	29.53	5.254	68.5744	0.550789	11.443	1.10716	0.0260566	5.46521	1.49523	6.21282	3.78092	0.413146	0.931285	32.7
2000	1065	21.7095	56.3239	-277760	8.85981	29.4008	5.266	68.636	0.552813	11.4115	1.10762	0.0257444	5.46381	1.47812	6.19267	3.78195	0.414651	0.935075	32.4
2000	1064	21.622	56.0786	-276671	8.82623	29.2728	5.277	68.6975	0.554832	11.3801	1.10806	0.0254338	5.46233	1.46115	6.17262	3.78294	0.416153	0.938858	32.2
2000	1063	21.5353	55.8355	-275592	8.79295	29.146	5.289	68.7588	0.556846	11.3488	1.10849	0.0251246	5.46077	1.44432	6.15267	3.78387	0.417651	0.942637	31.9
2000	1062	21.4495	55.5946	-274524	8.75999	29.0204	5.301	68.82	0.558856	11.3175	1.10891	0.0248168	5.45912	1.42764	6.13281	3.78476	0.419147	0.946411	31.7
2000	1061	21.3644	55.356	-273465	8.72732	28.8961	5.312	68.8811	0.560861	11.2863	1.10932	0.0245105	5.4574	1.4111	6.11305	3.7856	0.420639	0.950179	31.5
2000	1060	21.2801	55.1194	-272417	8.69496	28.7729	5.324	68.942	0.562861	11.2551	1.10972	0.0242056	5.45559	1.39469	6.0934	3.78639	0.422128	0.953942	31.2
2000	1059	21.1966	54.8851	-271378	8.66288	28.6508	5.336	69.0028	0.564857	11.2239	1.11011	0.0239022	5.4537	1.37843	6.07383	3.78714	0.423614	0.957701	31
2000	1058	21.1139	54.6528	-270350	8.6311	28.5299	5.347	69.0635	0.566848	11.1928	1.11048	0.0236001	5.45173	1.36231	6.05437	3.78784	0.425097	0.961454	30.7
2000	1057	21.0319	54.4225	-269331	8.59961	28.4102	5.359	69.124	0.568834	11.1618	1.11084	0.0232994	5.44967	1.34632	6.035	3.78849	0.426576	0.965202	30.5
2000	1056	20.9506	54.1943	-268321	8.56839	28.2915	5.37	69.1844	0.570816	11.1308	1.11119	0.0230001	5.44753	1.33046	6.01572	3.78909	0.428053	0.968946	30.2
2000	1055	20.8701	53.9681	-267321	8.53745	28.1739	5.382	69.2447	0.572793	11.0998	1.11153	0.0227021	5.4453	1.31474	5.99654	3.78966	0.429527	0.972685	30
2000	1054	20.7902	53.7439	-266329	8.50678	28.0574	5.393	69.3049	0.574765	11.0689	1.11185	0.0224055	5.44299	1.29915	5.97745	3.79017	0.430998	0.976419	29.8
2000	1053	20.7111	53.5216	-265347	8.47639	27.942	5.405	69.365	0.576733	11.038	1.11216	0.0221102	5.44059	1.2837	5.95846	3.79064	0.432466	0.980149	29.5
2000	1052	20.6327	53.3012	-264374	8.44625	27.8276	5.416	69.4249	0.578696	11.0072	1.11246	0.0218162	5.43811	1.26837	5.93955	3.79107	0.433931	0.983874	29.3
2000	1051	20.555	53.0827	-263409	8.41638	27.7142	5.428	69.4848	0.580655	10.9764	1.11275	0.0215235	5.43554	1.25317	5.92074	3.79146	0.435394	0.987595	29
2000	1050	20.4779	52.8661	-262453	8.38677	27.6018	5.439	69.5445	0.582609	10.9457	1.11302	0.0212321	5.43289	1.2381	5.90202	3.7918	0.436853	0.991311	28.8
2000	1049	20.4015	52.6513	-261506	8.3574	27.4904	5.45	69.6041	0.584558	10.915	1.11328	0.0209419	5.43014	1.22316	5.88339	3.7921	0.43831	0.995023	28.6
2000	1048	20.3258	52.4383	-260567	8.32829	27.38	5.462	69.6636	0.586503	10.8844	1.11353	0.0206529	5.42732	1.20834	5.86484	3.79236	0.439764	0.99873	28.3
2000	1047	20.2507	52.2271	-259636	8.29943	27.2706	5.473	69.723	0.588443	10.8538	1.11377	0.0203651	5.4244	1.19365	5.84639	3.79258	0.441215	1.00243	28.1
2000	1046	20.1763	52.0176	-258713	8.27081	27.1621	5.484	69.7823	0.590379	10.8233	1.11399	0.0200786	5.42139	1.17909	5.82802	3.79275	0.442663	1.00613	27.8
2000	1045	20.1024	51.8098	-257799	8.24242	27.0546	5.496	69.8414	0.59231	10.7928	1.1142	0.0197932	5.4183	1.16464	5.80974	3.79289	0.444109	1.00983	27.6
2000	1044	20.0292	51.6038	-256892	8.21428	26.948	5.507	69.9005	0.594236	10.7623	1.11439	0.0195089	5.41511	1.15032	5.79155	3.79298	0.445553	1.01352	27.4
2000	1043	19.9566	51.3995	-255993	8.18636	26.8423	5.518	69.9595	0.596157	10.7319	1.11457	0.0192258	5.41184	1.13612	5.77344	3.79304	0.446993	1.01721	27.1
2000	1042	19.8846	51.1968	-255102	8.15868	26.7374	5.53	70.0184	0.598074	10.7016	1.11474	0.0189438	5.40848	1.12203	5.75542	3.79306	0.448431	1.02089	26.9
2000	1041	19.8132	50.9957	-254218	8.13122	26.6335	5.541	70.0771	0.599986	10.6713	1.1149	0.0186628	5.40502	1.10807	5.73748	3.79303	0.449867	1.02457	26.7
2000	1040	19.7424	50.7962	-253342	8.10399	26.5305	5.552	70.1358	0.601894	10.641	1.11504	0.0183829	5.40147	1.09422	5.71963	3.79297	0.4513	1.02824	26.4
2000	1039	19.6722	50.5984	-252473	8.07697	26.4283	5.563	70.1944	0.603797	10.6108	1.11516	0.018104	5.39783	1.0805	5.70186	3.79288	0.45273	1.03191	26.2
2000	1038	19.6025	50.4021	-251612	8.05018	26.327	5.575	70.2529	0.605695	10.5807	1.11528	0.0178261	5.3941	1.06688	5.68417	3.79274	0.454158	1.03558	26
2000	1037	19.5334	50.2073	-250758	8.0236	26.2265	5.586	70.3113	0.607588	10.5506	1.11537	0.0175492	5.39027	1.05338	5.66657	3.79257	0.455584	1.03925	25.8
2000	1036	19.4648	50.0141	-249911	7.99722	26.1268	5.597	70.3696	0.609476	10.5205	1.11546	0.0172733	5.38635	1.04	5.64905	3.79236	0.457007	1.04291	25.5
2000	1035	19.3968	49.8224	-249070	7.97106	26.028	5.608	70.4279	0.61136	10.4905	1.11552	0.0169982	5.38233	1.02673	5.6316	3.79211	0.458428	1.04656	25.3
2000	1034	19.3294	49.6321	-248237	7.9451	25.9299	5.619	70.486	0.613238	10.4605	1.11558	0.0167241	5.37821	1.01357	5.61424	3.79183	0.459847	1.05022	25.1
2000	1033	19.2624	49.4433	-247411	7.91935	25.8326	5.63	70.5441	0.615112	10.4306	1.11561	0.0164508	5.374	1.00053	5.59695	3.79152	0.461263	1.05387	24.8
2000	1032	19.196	49.256	-246591	7.8938	25.7362	5.641	70.6021	0.61698	10.4007	1.11564	0.0161784	5.3697	0.987594	5.57975	3.79117	0.462677	1.05751	24.6
2000	1031	19.1301	49.0701	-245778	7.86844	25.6405	5.653	70.66	0.618844	10.3709	1.11565	0.0159067	5.36529	0.974769	5.56262	3.79078	0.464089	1.06116	24.4
2000	1030	19.0647	48.8856	-244971	7.84328	25.5455	5.664	70.7178	0.620702	10.3411	1.11564	0.0156358	5.36079	0.962053	5.54557	3.79036	0.465498	1.0648	24.2
2000	1029	18.9998	48.7025	-244171	7.81831	25.4513	5.675	70.7756	0.622555	10.3114	1.11561	0.0153657	5.35618	0.949446	5.5286	3.78991	0.466905	1.06843	23.9
2000	1028	18.9354	48.5207	-243377	7.79353	25.3578	5.686	70.8333	0.624403	10.2818	1.11557	0.0150962	5.35148	0.936946	5.5117	3.78942	0.468311	1.07207	23.7
2000	1027	18.8714	48.3403	-242590	7.76894	25.2651	5.697	70.8909	0.626245	10.2521	1.11552	0.0148275	5.34667	0.924554	5.49488	3.7889	0.469714	1.0757	23.5
2000	1026	18.808	48.1612	-241809	7.74453	25.1731	5.708	70.9484	0.628082	10.2226	1.11544	0.0145594	5.34176	0.912267	5.47813	3.78835	0.471115	1.07933	23.3
2000	1025	18.7451	47.9834	-241033	7.72031	25.0818	5.719	71.0059	0.629914	10.193	1.11535	0.0142918	5.33675	0.900086	5.46145	3.78777	0.472514	1.08295	23
2000	1024	18.6826	47.807	-240264	7.69626	24.9912	5.73	71.0633	0.63174	10.1636	1.11525	0.0140249	5.33163	0.88801	5.44485	3.78715	0.473911	1.08657	22.8
2000	1023	18.6205	47.6318	-239501	7.6724	24.9013	5.741	71.1207	0.63356	10.1341	1.11512	0.0137585	5.32641	0.876037	5.42832	3.7865	0.475305	1.09019	22.6
2000	1022	18.559	47.4579	-238744	7.6487	24.8121	5.752	71.1779	0.635374	10.1048	1.11498	0.0134926	5.32108	0.864168	5.41187	3.78583	0.476698	1.09381	22.4
2000	1021	18.4978	47.2852	-237992	7.62519	24.7235	5.763	71.2352	0.637182	10.0754	1.11482	0.0132272	5.31564	0.852402	5.39548	3.78512	0.47809	1.09743	22.2
2000	1020	18.4371	47.1137	-237247	7.60184	24.6356	5.774	71.2924	0.638985	10.0461	1.11465	0.0129623	5.3101	0.840737	5.37917	3.78438	0.479479	1.10104	21.9
2000	1019	18.3769	46.9435	-236507	7.57866	24.5484	5.785	71.3495	0.640781	10.0169	1.11445	0.0126978	5.30444	0.829174	5.36292	3.78361	0.480866	1.10465	21.7
2000	1018	18.3171	46.7744	-235772	7.55564	24.4618	5.796	71.4066	0.642571	9.98774	1.11424	0.0124336	5.29868	0.817712	5.34674	3.78281	0.482252	1.10825	21.5
2000	1017	18.2577	46.6065	-235043	7.53279	24.3758	5.807	71.4636	0.644354	9.9586	1.11401	0.0121698	5.2928	0.806349	5.33064	3.78199	0.483635	1.11186	21.3
2000	1016	18.1987	46.4398	-234319	7.5101	24.2905	5.818	71.5206	0.646131	9.92952	1.11376	0.0119064	5.28682	0.795086	5.3146	3.78113	0.485018	1.11546	21.1
2000	1015	18.1402	46.2743	-233601	7.48758	24.2058	5.829	71.5775	0.6479	9.90049	1.11349	0.0116433	5.28071	0.783922	5.29862	3.78025	0.486398	1.11906	20.9
2000	1014	18.082	46.1098	-232888	7.46521	24.1217	5.839	71.6344	0.649663	9.8715	1.1132	0.0113804	5.2745	0.772856	5.28272	3.77933	0.487777	1.12266	20.6
2000	1013	18.0243	45.9465	-232180	7.44299	24.0382	5.85	71.6913	0.651418	9.84257	1.11289	0.0111179	5.26817	0.761888	5.26687	3.77839	0.489154	1.12626	20.4
2000	1012	17.9669	45.7843	-231478	7.42093	23.9552	5.861	71.7481	0.653166	9.81368	1.11256	0.0108556	5.26172	0.751017	5.2511	3.77743	0.490529	1.12985	20.2
2000	1011	17.91	45.6232	-230780	7.39902	23.8729	5.872	71.8049	0.654906	9.78485	1.11221	0.0105936	5.25515	0.740243	5.23538	3.77643	0.491903	1.13345	20
2000	1010	17.8534	45.4632	-230088	7.37727	23.7912	5.883	71.8616	0.656638	9.75606	1.11184	0.0103318	5.24846	0.729564	5.21973	3.77541	0.493275	1.13704	19.8
2000	1009	17.7972	45.3042	-229401	7.35566	23.71	5.894	71.9184	0.658362	9.72733	1.11145	0.0100702	5.24165	0.718982	5.20414	3.77437	0.494646	1.14063	19.6
2000	1008	17.7414	45.1463	-228718	7.3342	23.6294	5.905	71.9751	0.660078	9.69865	1.11104	0.00980892	5.23472	0.708494	5.18862	3.7733	0.496015	1.14421	19.4
2000	1007	17.686	44.9894	-228041	7.31288	23.5494	5.916	72.0318	0.661784	9.67001	1.1106	0.00954789	5.22767	0.698101	5.17315	3.7722	0.497383	1.1478	19.2
2000	1006	17.6309	44.8336	-227368	7.2917	23.4699	5.926	72.0884	0.663481	9.64143	1.11014	0.00928714	5.22049	0.687802	5.15774	3.77108	0.49875	1.15138	19
2000	1005	17.5762	44.6788	-226700	7.27067	23.391	5.937	72.145	0.665169	9.6129	1.10967	0.00902671	5.21318	0.677597	5.1424	3.76993	0.500115	1.15497	18.8
2000	1004	17.5219	44.5249	-226036	7.24978	23.3126	5.948	72.2017	0.666848	9.58442	1.10916	0.00876661	5.20575	0.667485	5.12711	3.76876	0.501478	1.15855	18.6
2000	1003	17.4679	44.3721	-225378	7.22902	23.2347	5.959	72.2583	0.668516	9.55599	1.10864	0.00850691	5.19819	0.657465	5.11188	3.76756	0.502841	1.16213	18.3
2000	1002	17.4143	44.2202	-224723	7.2084	23.1573	5.97	72.3149	0.670173	9.52762	1.10809	0.00824765	5.1905	0.647539	5.0967	3.76634	0.504202	1.16571	18.1
2000	1001	17.361	44.0693	-224074	7.18792	23.0805	5.981	72.3715	0.67182	9.49929	1.10752	0.00798888	5.18267	0.637704	5.08158	3.7651	0.505562	1.16929	17.9
2000	1000	17.3081	43.9193	-223429	7.16757	23.0042	5.991	72.4281	0.673455	9.47102	1.10692	0.0077307	5.17472	0.62796	5.06652	3.76384	0.50692	1.17286	17.7
2000	999	17.2554	43.7703	-222788	7.14735	22.9283	6.002	72.4846	0.675078	9.4428	1.1063	0.00747318	5.16663	0.618308	5.05151	3.76255	0.508278	1.17644	17.5
2000	998	17.2032	43.6222	-222151	7.12726	22.853	6.013	72.5412	0.676689	9.41463	1.10566	0.00721641	5.1584	0.608747	5.03655	3.76124	0.509634	1.18002	17.3
2000	997	17.1512	43.475	-221519	7.1073	22.7782	6.024	72.5978	0.678288	9.38652	1.10499	0.00696051	5.15004	0.599276	5.02165	3.75991	0.510989	1.18359	17.1
2000	996	17.0996	43.3288	-220892	7.08746	22.7038	6.035	72.6544	0.679874	9.35846	1.10429	0.00670558	5.14153	0.589896	5.00679	3.75855	0.512343	1.18716	16.9
2000	995	17.0483	43.1834	-220268	7.06776	22.63	6.045	72.711	0.681446	9.33045	1.10357	0.00645178	5.13289	0.580605	4.99199	3.75718	0.513696	1.19074	16.7
2000	994	16.9973	43.0389	-219649	7.04817	22.5566	6.056	72.7676	0.683003	9.30249	1.10282	0.00619923	5.12411	0.571404	4.97724	3.75578	0.515048	1.19431	16.5
2000	993	16.9466	42.8953	-219033	7.02871	22.4837	6.067	72.8242	0.684547	9.27459	1.10205	0.00594809	5.11518	0.562292	4.96254	3.75436	0.516399	1.19788	16.3
2000	992	16.8963	42.7526	-218422	7.00937	22.4112	6.078	72.8809	0.686075	9.24674	1.10124	0.00569854	5.10612	0.553269	4.94788	3.75293	0.517749	1.20145	16.2
2000	991	16.8462	42.6107	-217815	6.99015	22.3392	6.089	72.9375	0.687587	9.21895	1.10041	0.00545076	5.0969	0.544334	4.93327	3.75147	0.519098	1.20502	16
2000	990	16.7964	42.4696	-217212	6.97105	22.2677	6.099	72.9942	0.689083	9.1912	1.09956	0.00520495	5.08754	0.535488	4.91871	3.74999	0.520446	1.20859	15.8
2000	989	16.747	42.3294	-216613	6.95207	22.1966	6.11	73.0509	0.690562	9.16352	1.09867	0.0049613	5.07804	0.52673	4.90419	3.7485	0.521793	1.21216	15.6
2000	988	16.6978	42.19	-216018	6.9332	22.1259	6.121	73.1076	0.692024	9.13588	1.09776	0.00472005	5.06838	0.51806	4.88972	3.74698	0.52314	1.21573	15.4
2000	987	16.649	42.0515	-215426	6.91445	22.0557	6.132	73.1644	0.693468	9.1083	1.09681	0.00448142	5.05858	0.509477	4.87529	3.74545	0.524485	1.2193	15.2
2000	986	16.6004	41.9137	-214839	6.89581	21.9859	6.143	73.2211	0.694893	9.08078	1.09584	0.00424567	5.04862	0.500982	4.86091	3.74389	0.52583	1.22286	15
2000	985	16.5521	41.7767	-214255	6.87729	21.9165	6.153	73.278	0.696298	9.05331	1.09484	0.00401304	5.03851	0.492574	4.84656	3.74232	0.527174	1.22643	14.8
2000	984	16.5041	41.6406	-213675	6.85887	21.8476	6.164	73.3348	0.697684	9.02589	1.09381	0.0037838	5.02825	0.484253	4.83226	3.74073	0.528517	1.23	14.6
2000	983	16.4563	41.5052	-213098	6.84057	21.7791	6.175	73.3917	0.699049	8.99853	1.09275	0.00355823	5.01784	0.476019	4.818	3.73912	0.529859	1.23357	14.4
2000	982	16.4089	41.3706	-212526	6.82238	21.711	6.186	73.4486	0.700392	8.97122	1.09165	0.00333662	5.00727	0.467871	4.80378	3.7375	0.531201	1.23714	14.3
2000	981	16.3617	41.2367	-211957	6.80429	21.6433	6.196	73.5056	0.701714	8.94397	1.09053	0.00311927	4.99654	0.459809	4.78959	3.73585	0.532541	1.2407	14.1
2000	980	16.3148	41.1036	-211391	6.78631	21.576	6.207	73.5626	0.703013	8.91677	1.08937	0.00290646	4.98566	0.451834	4.77545	3.73419	0.533882	1.24427	13.9
2000	979	16.2681	40.9713	-210829	6.76844	21.5091	6.218	73.6197	0.704288	8.88963	1.08819	0.00269853	4.97462	0.443944	4.76134	3.73251	0.535221	1.24784	13.7
2000	978	16.2217	40.8397	-210271	6.75067	21.4426	6.229	73.6768	0.70554	8.86255	1.08697	0.00249578	4.96342	0.436141	4.74726	3.73082	0.53656	1.25141	13.5
2000	977	16.1756	40.7088	-209716	6.73301	21.3765	6.24	73.734	0.706766	8.83552	1.08572	0.00229854	4.95206	0.428423	4.73322	3.72911	0.537899	1.25498	13.3
2000	976	16.1297	40.5787	-209165	6.71544	21.3107	6.25	73.7912	0.707966	8.80854	1.08443	0.00210715	4.94054	0.42079	4.71922	3.72738	0.539236	1.25855	13.2
2000	975	16.0841	40.4492	-208617	6.69798	21.2454	6.261	73.8485	0.70914	8.78162	1.08312	0.00192192	4.92886	0.413243	4.70525	3.72564	0.540573	1.26212	13
2000	974	16.0387	40.3205	-208072	6.68063	21.1805	6.272	73.9059	0.710286	8.75476	1.08176	0.0017432	4.91702	0.405781	4.69131	3.72388	0.54191	1.26569	12.8
2000	973	15.9936	40.1925	-207531	6.66337	21.1159	6.283	73.9633	0.711403	8.72795	1.08038	0.00157133	4.90501	0.398404	4.6774	3.7221	0.543246	1.26925	12.6
2000	972	15.9488	40.0652	-206993	6.64621	21.0517	6.294	74.0208	0.712491	8.7012	1.07896	0.00140664	4.89284	0.391112	4.66353	3.72031	0.544582	1.27282	12.5
2000	971	15.9042	39.9386	-206459	6.62915	20.9878	6.304	74.0783	0.713549	8.6745	1.07751	0.00124947	4.8805	0.383905	4.64968	3.7185	0.545917	1.2764	12.3
2000	970	15.8598	39.8126	-205928	6.61218	20.9243	6.315	74.1359	0.714574	8.64786	1.07602	0.00110016	4.86799	0.376782	4.63586	3.71668	0.547251	1.27997	12.1
2000	969	15.8157	39.6874	-205399	6.59532	20.8612	6.326	74.1936	0.715567	8.62127	1.0745	0.000959038	4.85532	0.369745	4.62207	3.71484	0.548585	1.28354	11.9
2000	968	15.7718	39.5628	-204875	6.57854	20.7984	6.337	74.2514	0.716525	8.59474	1.07294	0.000826441	4.84247	0.362792	4.60831	3.71299	0.549919	1.28711	11.8
2000	967	15.7281	39.4388	-204353	6.56187	20.736	6.348	74.3092	0.717446	8.56827	1.07134	0.000702688	4.82945	0.355924	4.59458	3.71112	0.551252	1.29068	11.6
2000	966	15.6847	39.3155	-203834	6.54528	20.674	6.359	74.3672	0.718329	8.54185	1.06971	0.000588097	4.81625	0.349141	4.58087	3.70924	0.552585	1.29426	11.4
2000	965	15.6415	39.1929	-203319	6.52879	20.6122	6.369	74.4252	0.71917	8.51549	1.06803	0.000482975	4.80286	0.342444	4.56718	3.70735	0.553917	1.29783	11.3
2000	964	15.5985	39.0709	-202807	6.51239	20.5508	6.38	74.4834	0.719966	8.48918	1.06632	0.000387619	4.78929	0.335832	4.55352	3.70544	0.55525	1.30141	11.1
2000	963	15.5557	38.9495	-202297	6.49608	20.4898	6.391	74.5417	0.720713	8.46293	1.06456	0.000302309	4.77551	0.329306	4.53987	3.70352	0.556582	1.30498	10.9
2000	962	15.5132	38.8287	-201791	6.47986	20.4291	6.402	74.6002	0.721403	8.43674	1.06275	0.000227311	4.76152	0.322868	4.52625	3.70158	0.557914	1.30856	10.8
2000	961	15.4709	38.7085	-201288	6.46373	20.3686	6.413	74.6588	0.722027	8.4106	1.0609	0.000162864	4.7473	0.316519	4.51264	3.69963	0.559247	1.31214	10.6
2000	960	15.4287	38.5889	-200787	6.44768	20.3085	6.424	74.7177	0.72257	8.38451	1.05898	0.000109175	4.7328	0.310263	4.49904	3.69768	0.56058	1.31573	10.5
2000	959	15.3867	38.4697	-200290	6.43171	20.2486	6.435	74.777	0.723003	8.35849	1.057	6.64014e-05	4.71797	0.304103	4.48545	3.69571	0.561914	1.31932	10.3
2000	958	15.3449	38.351	-199794	6.41581	20.189	6.446	74.8368	0.723273	8.33251	1.05491	3.46146e-05	4.70266	0.298053	4.47184	3.69374	0.563251	1.32291	10.2
2000	957	15.305	38.237	-199310	6.40032	20.1319	6.456	74.8872	0.72595	8.30661	1.05405	0	4.69328	0.291548	4.45893	3.69155	0.564529	1.32637	10
2000	956	15.2645	38.1218	-198825	6.38478	20.0741	6.466	74.9417	0.727558	8.28076	1.05261	0	4.68111	0.285362	4.44575	3.68944	0.565831	1.32988	9.8
2000	955	15.2191	37.9945	-198319	6.36833	20.0098	6.48	75.0265	0.721308	8.25489	1.04716	0	4.64967	0.280926	4.43048	3.68795	0.567318	1.33385	9.7
2000	954	15.1742	37.8687	-197817	6.35204	19.9463	6.494	75.1096	0.715472	8.22899	1.04188	0	4.61912	0.276455	4.4155	3.68639	0.568794	1.3378	9.6
2000	953	15.1296	37.7437	-197318	6.33584	19.8832	6.508	75.1924	0.709738	8.20305	1.03661	0	4.58866	0.272012	4.40077	3.68477	0.570267	1.34174	9.6
2000	952	15.0853	37.6197	-196823	6.31977	19.8207	6.522	75.2748	0.704064	8.17714	1.03136	0	4.55835	0.267624	4.38611	3.68312	0.571736	1.34568	9.5
2000	951	15.0414	37.4967	-196333	6.30383	19.7586	6.536	75.3569	0.69845	8.15128	1.02613	0	4.5282	0.263291	4.37152	3.68144	0.5732	1.3496	9.4
2000	950	14.9979	37.3745	-195846	6.28801	19.6971	6.55	75.4386	0.692895	8.12545	1.02091	0	4.4982	0.259011	4.357	3.67972	0.574659	1.35352	9.3
2000	949	14.9548	37.2534	-195363	6.27231	19.636	6.563	75.52	0.687398	8.09967	1.01572	0	4.46836	0.254785	4.34254	3.67797	0.576114	1.35743	9.2
2000	948	14.912	37.1331	-194884	6.25673	19.5755	6.577	75.6011	0.681959	8.07393	1.01053	0	4.43866	0.250611	4.32815	3.67618	0.577564	1.36132	9.1
2000	947	14.8695	37.0138	-194408	6.24127	19.5154	6.591	75.6818	0.676577	8.04823	1.00537	0	4.40912	0.24649	4.31383	3.67436	0.57901	1.36521	9.1
2000	946	14.8274	36.8954	-193936	6.22593	19.4559	6.604	75.7622	0.671252	8.02257	1.00022	0	4.37972	0.242419	4.29957	3.67251	0.580451	1.36909	9
2000	945	14.7856	36.7778	-193468	6.2107	19.3967	6.618	75.8422	0.665983	7.99695	0.995095	0	4.35048	0.2384	4.28538	3.67063	0.581887	1.37296	8.9
2000	944	14.7441	36.6612	-193004	6.19559	19.3381	6.631	75.922	0.66077	7.97138	0.989982	0	4.32138	0.234431	4.27126	3.66871	0.583319	1.37682	8.8
2000	943	14.703	36.5454	-192543	6.18059	19.2799	6.645	76.0013	0.655611	7.94585	0.984886	0	4.29243	0.230512	4.2572	3.66676	0.584747	1.38067	8.7
2000	942	14.6622	36.4305	-192086	6.1657	19.2222	6.658	76.0804	0.650507	7.92036	0.979806	0	4.26362	0.226643	4.2432	3.66478	0.58617	1.38451	8.7
2000	941	14.6218	36.3164	-191632	6.15093	19.165	6.672	76.1591	0.645456	7.89492	0.974744	0	4.23496	0.222821	4.22926	3.66276	0.587589	1.38834	8.6
2000	940	14.5816	36.2032	-191181	6.13626	19.1082	6.685	76.2376	0.640459	7.86952	0.969698	0	4.20644	0.219049	4.21539	3.66072	0.589003	1.39216	8.5
2000	939	14.5418	36.0908	-190734	6.1217	19.0518	6.698	76.3156	0.635514	7.84416	0.964668	0	4.17807	0.215323	4.20159	3.65865	0.590413	1.39598	8.4
2000	938	14.5022	35.9792	-190291	6.10725	18.9958	6.711	76.3934	0.630622	7.81884	0.959655	0	4.14984	0.211645	4.18784	3.65654	0.591819	1.39978	8.3
2000	937	14.463	35.8685	-189851	6.0929	18.9403	6.724	76.4709	0.625781	7.79357	0.954659	0	4.12175	0.208014	4.17416	3.65441	0.59322	1.40358	8.3
2000	936	14.4241	35.7585	-189414	6.07866	18.8853	6.737	76.548	0.620992	7.76834	0.949678	0	4.09381	0.204429	4.16053	3.65224	0.594617	1.40737	8.2
2000	935	14.3855	35.6494	-188980	6.06452	18.8306	6.75	76.6248	0.616253	7.74316	0.944715	0	4.066	0.200889	4.14697	3.65005	0.59601	1.41114	8.1
2000	934	14.3472	35.541	-188550	6.05048	18.7764	6.763	76.7013	0.611564	7.71802	0.939767	0	4.03834	0.197395	4.13347	3.64783	0.597398	1.41491	8
2000	933	14.3091	35.4334	-188122	6.03654	18.7225	6.776	76.7775	0.606924	7.69293	0.934836	0	4.01081	0.193945	4.12003	3.64558	0.598783	1.41867	7.9
2000	932	14.2714	35.3265	-187698	6.02271	18.6691	6.789	76.8534	0.602334	7.66787	0.929921	0	3.98343	0.19054	4.10665	3.6433	0.600162	1.42243	7.9
2000	931	14.2339	35.2204	-187277	6.00897	18.6161	6.802	76.9289	0.597793	7.64287	0.925022	0	3.95618	0.187179	4.09332	3.64099	0.601538	1.42617	7.8
2000	930	14.1968	35.1151	-186859	5.99533	18.5635	6.815	77.0042	0.593299	7.6179	0.920139	0	3.92907	0.18386	4.08006	3.63866	0.602909	1.4299	7.7
2000	929	14.1599	35.0105	-186445	5.98178	18.5113	6.828	77.0792	0.588854	7.59299	0.915272	0	3.9021	0.180585	4.06685	3.63629	0.604276	1.43363	7.6
2000	928	14.1233	34.9067	-186033	5.96833	18.4594	6.84	77.1538	0.584455	7.56811	0.910421	0	3.87526	0.177352	4.05371	3.6339	0.605639	1.43734	7.5
2000	927	14.0869	34.8035	-185624	5.95498	18.408	6.853	77.2282	0.580103	7.54329	0.905586	0	3.84856	0.174161	4.04062	3.63148	0.606998	1.44105	7.5
2000	926	14.0509	34.7011	-185218	5.94172	18.3569	6.866	77.3022	0.575798	7.5185	0.900767	0	3.82199	0.171011	4.02758	3.62904	0.608353	1.44475	7.4
2000	925	14.0151	34.5994	-184815	5.92855	18.3062	6.878	77.3759	0.571538	7.49377	0.895964	0	3.79556	0.167903	4.0146	3.62657	0.609703	1.44844	7.3
2000	924	13.9795	34.4984	-184415	5.91547	18.2559	6.891	77.4494	0.567324	7.46908	0.891177	0	3.76926	0.164835	4.00168	3.62407	0.61105	1.45212	7.2
2000	923	13.9443	34.3981	-184018	5.90249	18.2059	6.903	77.5226	0.563155	7.44443	0.886405	0	3.7431	0.161808	3.98882	3.62155	0.612392	1.4558	7.2
2000	922	13.9093	34.2984	-183624	5.88959	18.1563	6.916	77.5954	0.55903	7.41983	0.88165	0	3.71706	0.15882	3.97601	3.619	0.61373	1.45946	7.1
2000	921	13.8745	34.1995	-183232	5.87678	18.1071	6.928	77.668	0.554949	7.39527	0.87691	0	3.69116	0.155872	3.96325	3.61643	0.615064	1.46312	7
2000	920	13.84	34.1012	-182843	5.86406	18.0582	6.94	77.7402	0.550912	7.37076	0.872186	0	3.66539	0.152963	3.95056	3.61383	0.616394	1.46676	6.9
2000	919	13.8057	34.0036	-182457	5.85142	18.0097	6.953	77.8122	0.546918	7.3463	0.867477	0	3.63976	0.150092	3.93791	3.61121	0.61772	1.4704	6.8
2000	918	13.7717	33.9066	-182074	5.83888	17.9615	6.965	77.8839	0.542967	7.32188	0.862784	0	3.61425	0.14726	3.92532	3.60856	0.619042	1.47403	6.8
2000	917	13.738	33.8103	-181693	5.82641	17.9137	6.977	77.9553	0.539058	7.29751	0.858107	0	3.58887	0.144466	3.91278	3.60589	0.62036	1.47765	6.7
2000	916	13.7045	33.7147	-181315	5.81403	17.8662	6.989	78.0264	0.535191	7.27318	0.853445	0	3.56363	0.141709	3.9003	3.60319	0.621674	1.48127	6.6
2000	915	13.6712	33.6196	-180940	5.80174	17.819	7.001	78.0972	0.531366	7.2489	0.848799	0	3.53851	0.138989	3.88786	3.60047	0.622984	1.48487	6.5
2000	914	13.6382	33.5252	-180567	5.78952	17.7722	7.013	78.1678	0.527582	7.22467	0.844169	0	3.51352	0.136306	3.87549	3.59773	0.624289	1.48847	6.5
2000	913	13.6054	33.4314	-180197	5.77739	17.7257	7.025	78.238	0.523839	7.20048	0.839554	0	3.48865	0.13366	3.86316	3.59496	0.625591	1.49206	6.4
2000	912	13.5728	33.3383	-179829	5.76534	17.6795	7.037	78.308	0.520136	7.17634	0.834954	0	3.46392	0.131049	3.85088	3.59217	0.626889	1.49564	6.3
2000	911	13.5405	33.2457	-179464	5.75337	17.6337	7.049	78.3777	0.516473	7.15225	0.83037	0	3.43931	0.128474	3.83866	3.58936	0.628183	1.49921	6.2
2000	910	13.5084	33.1538	-179101	5.74147	17.5881	7.061	78.4471	0.51285	7.1282	0.825802	0	3.41483	0.125934	3.82649	3.58652	0.629473	1.50277	6.2
2000	909	13.4765	33.0624	-178741	5.72966	17.5429	7.073	78.5163	0.509266	7.1042	0.821249	0	3.39047	0.12343	3.81437	3.58366	0.630759	1.50633	6.1
2000	908	13.4448	32.9717	-178383	5.71792	17.498	7.085	78.5851	0.505721	7.08025	0.816711	0	3.36624	0.120959	3.8023	3.58078	0.632041	1.50987	6
2000	907	13.4134	32.8815	-178028	5.70626	17.4534	7.096	78.6537	0.502214	7.05634	0.812189	0	3.34214	0.118524	3.79028	3.57788	0.633319	1.51341	5.9
2000	906	13.3822	32.7919	-177675	5.69468	17.4092	7.108	78.722	0.498745	7.03248	0.807682	0	3.31816	0.116122	3.7783	3.57496	0.634594	1.51694	5.9
2000	905	13.3512	32.7029	-177325	5.68317	17.3652	7.12	78.79	0.495314	7.00867	0.80319	0	3.2943	0.113753	3.76638	3.57201	0.635864	1.52047	5.8
2000	904	13.3204	32.6144	-176976	5.67173	17.3215	7.131	78.8578	0.491921	6.9849	0.798714	0	3.27057	0.111418	3.75451	3.56905	0.637131	1.52398	5.7
2000	903	13.2898	32.5266	-176630	5.66037	17.2781	7.143	78.9253	0.488565	6.96119	0.794253	0	3.24696	0.109116	3.74269	3.56606	0.638394	1.52748	5.7
2000	902	13.2595	32.4392	-176287	5.64909	17.235	7.154	78.9925	0.485245	6.93752	0.789808	0	3.22347	0.106846	3.73092	3.56305	0.639652	1.53098	5.6
2000	901	13.2293	32.3524	-175946	5.63787	17.1922	7.166	79.0595	0.481961	6.91389	0.785378	0	3.20011	0.104609	3.71919	3.56002	0.640907	1.53447	5.5
2000	900	13.1994	32.2662	-175607	5.62673	17.1497	7.177	79.1261	0.478714	6.89032	0.780963	0	3.17687	0.102403	3.70751	3.55697	0.642159	1.53795	5.4
spinel_0	thermodynamic	data	and	composition:
Pressure	Temperature	mass	S	H	V	Cp	formula	SiO2	TiO2	Al2O3	Fe2O3	Cr2O3	FeO	MgO	CaO	Na2O	K2O	H2O
2000	1103	2.6e-05	5.3e-05	-0.166631	6e-06	2.4e-05	Fe''0.78Mg0.25Fe'''0.50Al0.37Cr1.06Ti0.03O4	0	1.26496	9.14534	19.0455	38.7538	26.9138	4.87668	0	0	0	0
2000	1102	0.000405	0.00082	-2.57875	8.6e-05	0.000378	Fe''0.78Mg0.25Fe'''0.50Al0.37Cr1.06Ti0.03O4	0	1.28358	9.10018	19.1361	38.6575	26.9912	4.83149	0	0	0	0
2000	1101	0.00078	0.00158	-4.96208	0.000165	0.000727	Fe''0.79Mg0.25Fe'''0.50Al0.37Cr1.06Ti0.03O4	0	1.30249	9.05541	19.2274	38.5597	27.0682	4.78678	0	0	0	0
2000	1100	0.001152	0.002333	-7.31747	0.000244	0.001074	Fe''0.79Mg0.25Fe'''0.51Al0.37Cr1.06Ti0.03O4	0	1.32169	9.01103	19.3193	38.4606	27.1449	4.74253	0	0	0	0
2000	1099	0.001369	0.00277	-8.67927	0.00029	0.001275	Fe''0.79Mg0.24Fe'''0.51Al0.37Cr1.05Ti0.04O4	0	1.34119	8.96702	19.412	38.36	27.2211	4.69874	0	0	0	0
2000	1098	0.001365	0.002761	-8.64012	0.000289	0.00127	Fe''0.79Mg0.24Fe'''0.51Al0.37Cr1.05Ti0.04O4	0	1.361	8.92335	19.5053	38.2579	27.297	4.6554	0	0	0	0
2000	1097	0.001361	0.002753	-8.60162	0.000288	0.001266	Fe''0.80Mg0.24Fe'''0.51Al0.36Cr1.05Ti0.04O4	0	1.38112	8.88003	19.5994	38.1544	27.3725	4.6125	0	0	0	0
2000	1096	0.001357	0.002744	-8.56377	0.000287	0.001262	Fe''0.80Mg0.24Fe'''0.52Al0.36Cr1.05Ti0.04O4	0	1.40156	8.83704	19.6942	38.0495	27.4477	4.57003	0	0	0	0
2000	1095	0.001353	0.002736	-8.52654	0.000286	0.001257	Fe''0.80Mg0.24Fe'''0.52Al0.36Cr1.05Ti0.04O4	0	1.42233	8.79435	19.7897	37.943	27.5226	4.52798	0	0	0	0
2000	1094	0.00135	0.002727	-8.48992	0.000285	0.001253	Fe''0.80Mg0.23Fe'''0.52Al0.36Cr1.04Ti0.04O4	0	1.44344	8.75197	19.8861	37.8349	27.5972	4.48635	0	0	0	0
2000	1093	0.001346	0.002719	-8.45391	0.000284	0.001249	Fe''0.81Mg0.23Fe'''0.52Al0.36Cr1.04Ti0.04O4	0	1.4649	8.70986	19.9832	37.7254	27.6715	4.44514	0	0	0	0
2000	1092	0.001343	0.002711	-8.41849	0.000283	0.001245	Fe''0.81Mg0.23Fe'''0.53Al0.36Cr1.04Ti0.04O4	0	1.48671	8.66803	20.0812	37.6142	27.7455	4.40432	0	0	0	0
2000	1091	0.001339	0.002704	-8.38365	0.000282	0.001241	Fe''0.81Mg0.23Fe'''0.53Al0.36Cr1.04Ti0.04O4	0	1.50888	8.62646	20.1799	37.5015	27.8193	4.36391	0	0	0	0
2000	1090	0.001336	0.002696	-8.34936	0.000282	0.001237	Fe''0.82Mg0.23Fe'''0.53Al0.35Cr1.03Ti0.04O4	0	1.53142	8.58513	20.2796	37.3872	27.8929	4.32388	0	0	0	0
2000	1089	0.001333	0.002688	-8.31564	0.000281	0.001234	Fe''0.82Mg0.22Fe'''0.54Al0.35Cr1.03Ti0.04O4	0	1.55435	8.54404	20.38	37.2712	27.9662	4.28424	0	0	0	0
2000	1088	0.001329	0.002681	-8.28245	0.00028	0.00123	Fe''0.82Mg0.22Fe'''0.54Al0.35Cr1.03Ti0.04O4	0	1.57767	8.50316	20.4814	37.1535	28.0393	4.24497	0	0	0	0
2000	1087	0.001326	0.002674	-8.24979	0.000279	0.001226	Fe''0.82Mg0.22Fe'''0.54Al0.35Cr1.02Ti0.04O4	0	1.60139	8.46249	20.5837	37.0342	28.1122	4.20607	0	0	0	0
2000	1086	0.001323	0.002667	-8.21765	0.000279	0.001223	Fe''0.83Mg0.22Fe'''0.55Al0.35Cr1.02Ti0.04O4	0	1.62552	8.42202	20.6868	36.9131	28.185	4.16754	0	0	0	0
2000	1085	0.00132	0.00266	-8.18602	0.000278	0.001219	Fe''0.83Mg0.22Fe'''0.55Al0.35Cr1.02Ti0.04O4	0	1.65007	8.38172	20.791	36.7903	28.2576	4.12937	0	0	0	0
2000	1084	0.001317	0.002653	-8.15489	0.000277	0.001216	Fe''0.83Mg0.21Fe'''0.55Al0.34Cr1.02Ti0.04O4	0	1.67506	8.3416	20.896	36.6657	28.33	4.09155	0	0	0	0
2000	1083	0.001314	0.002647	-8.12425	0.000276	0.001212	Fe''0.83Mg0.21Fe'''0.55Al0.34Cr1.01Ti0.04O4	0	1.7005	8.30163	21.0021	36.5393	28.4024	4.05407	0	0	0	0
2000	1082	0.001312	0.00264	-8.0941	0.000276	0.001209	Fe''0.84Mg0.21Fe'''0.56Al0.34Cr1.01Ti0.05O4	0	1.72639	8.2618	21.1092	36.4111	28.4746	4.01694	0	0	0	0
2000	1081	0.001309	0.002634	-8.06441	0.000275	0.001206	Fe''0.84Mg0.21Fe'''0.56Al0.34Cr1.01Ti0.05O4	0	1.75275	8.2221	21.2172	36.281	28.5468	3.98014	0	0	0	0
2000	1080	0.001306	0.002628	-8.03519	0.000274	0.001203	Fe''0.84Mg0.21Fe'''0.56Al0.34Cr1.00Ti0.05O4	0	1.77959	8.18253	21.3263	36.149	28.6189	3.94367	0	0	0	0
2000	1079	0.001303	0.002622	-8.00642	0.000274	0.0012	Fe''0.84Mg0.20Fe'''0.57Al0.34Cr1.00Ti0.05O4	0	1.80693	8.14305	21.4365	36.015	28.6909	3.90752	0	0	0	0
2000	1078	0.001301	0.002616	-7.9781	0.000273	0.001197	Fe''0.85Mg0.20Fe'''0.57Al0.34Cr1.00Ti0.05O4	0	1.83478	8.10367	21.5478	35.8791	28.7629	3.8717	0	0	0	0
2000	1077	0.001298	0.00261	-7.95022	0.000273	0.001194	Fe''0.85Mg0.20Fe'''0.57Al0.33Cr0.99Ti0.05O4	0	1.86315	8.06437	21.6602	35.7412	28.8349	3.83618	0	0	0	0
2000	1076	0.001296	0.002604	-7.92278	0.000272	0.001191	Fe''0.85Mg0.20Fe'''0.58Al0.33Cr0.99Ti0.05O4	0	1.89207	8.02514	21.7736	35.6012	28.907	3.80097	0	0	0	0
2000	1075	0.001293	0.002599	-7.89576	0.000271	0.001188	Fe''0.85Mg0.20Fe'''0.58Al0.33Cr0.99Ti0.05O4	0	1.92153	7.98596	21.8883	35.4592	28.979	3.76607	0	0	0	0
2000	1074	0.001291	0.002594	-7.86915	0.000271	0.001185	Fe''0.86Mg0.20Fe'''0.58Al0.33Cr0.98Ti0.05O4	0	1.95157	7.94682	22.0041	35.315	29.0511	3.73146	0	0	0	0
2000	1073	0.001289	0.002588	-7.84296	0.00027	0.001183	Fe''0.86Mg0.19Fe'''0.59Al0.33Cr0.98Ti0.05O4	0	1.98219	7.90771	22.1211	35.1686	29.1232	3.69715	0	0	0	0
2000	1072	0.001287	0.002583	-7.81718	0.00027	0.00118	Fe''0.86Mg0.19Fe'''0.59Al0.33Cr0.98Ti0.05O4	0	2.01342	7.86862	22.2394	35.02	29.1954	3.66312	0	0	0	0
2000	1071	0.001284	0.002578	-7.7918	0.000269	0.001177	Fe''0.86Mg0.19Fe'''0.59Al0.33Cr0.97Ti0.05O4	0	2.04527	7.82952	22.3588	34.8692	29.2678	3.62937	0	0	0	0
2000	1070	0.001282	0.002573	-7.76681	0.000269	0.001175	Fe''0.87Mg0.19Fe'''0.60Al0.32Cr0.97Ti0.06O4	0	2.07776	7.79042	22.4796	34.7161	29.3403	3.59591	0	0	0	0
2000	1069	0.00128	0.002569	-7.74221	0.000268	0.001172	Fe''0.87Mg0.19Fe'''0.60Al0.32Cr0.96Ti0.06O4	0	2.11091	7.75129	22.6016	34.5606	29.4129	3.56271	0	0	0	0
2000	1068	0.001278	0.002564	-7.718	0.000268	0.00117	Fe''0.87Mg0.19Fe'''0.60Al0.32Cr0.96Ti0.06O4	0	2.14474	7.71212	22.725	34.4027	29.4857	3.52979	0	0	0	0
2000	1067	0.001276	0.002559	-7.69417	0.000267	0.001167	Fe''0.87Mg0.18Fe'''0.61Al0.32Cr0.96Ti0.06O4	0	2.17927	7.6729	22.8496	34.2424	29.5587	3.49712	0	0	0	0
2000	1066	0.001274	0.002555	-7.67071	0.000267	0.001165	Fe''0.88Mg0.18Fe'''0.61Al0.32Cr0.95Ti0.06O4	0	2.21452	7.63362	22.9757	34.0795	29.6319	3.46472	0	0	0	0
2000	1065	0.001273	0.002551	-7.64763	0.000266	0.001163	Fe''0.88Mg0.18Fe'''0.62Al0.32Cr0.95Ti0.06O4	0	2.25051	7.59425	23.1031	33.9142	29.7054	3.43257	0	0	0	0
2000	1064	0.001271	0.002547	-7.62492	0.000266	0.001161	Fe''0.88Mg0.18Fe'''0.62Al0.32Cr0.94Ti0.06O4	0	2.28728	7.55478	23.232	33.7462	29.7791	3.40068	0	0	0	0
2000	1063	0.001269	0.002543	-7.60257	0.000265	0.001159	Fe''0.88Mg0.18Fe'''0.62Al0.31Cr0.94Ti0.06O4	0	2.32484	7.51521	23.3623	33.5755	29.8531	3.36903	0	0	0	0
2000	1062	0.001267	0.002539	-7.58058	0.000265	0.001157	Fe''0.89Mg0.18Fe'''0.63Al0.31Cr0.94Ti0.06O4	0	2.36321	7.47551	23.4941	33.4021	29.9275	3.33762	0	0	0	0
2000	1061	0.001266	0.002535	-7.55896	0.000264	0.001155	Fe''0.89Mg0.17Fe'''0.63Al0.31Cr0.93Ti0.06O4	0	2.40243	7.43568	23.6274	33.2259	30.0022	3.30644	0	0	0	0
2000	1060	0.001264	0.002532	-7.53769	0.000264	0.001153	Fe''0.89Mg0.17Fe'''0.63Al0.31Cr0.93Ti0.07O4	0	2.44252	7.39568	23.7622	33.0469	30.0773	3.2755	0	0	0	0
2000	1059	0.001263	0.002528	-7.51679	0.000264	0.001151	Fe''0.89Mg0.17Fe'''0.64Al0.31Cr0.92Ti0.07O4	0	2.48351	7.35552	23.8985	32.8649	30.1528	3.24479	0	0	0	0
2000	1058	0.001261	0.002525	-7.49623	0.000263	0.001149	Fe''0.90Mg0.17Fe'''0.64Al0.31Cr0.92Ti0.07O4	0	2.52544	7.31517	24.0364	32.68	30.2287	3.21431	0	0	0	0
2000	1057	0.00126	0.002522	-7.47603	0.000263	0.001147	Fe''0.90Mg0.17Fe'''0.65Al0.30Cr0.91Ti0.07O4	0	2.56832	7.27461	24.1759	32.492	30.3051	3.18405	0	0	0	0
2000	1056	0.001259	0.002518	-7.45619	0.000263	0.001145	Fe''0.90Mg0.17Fe'''0.65Al0.30Cr0.91Ti0.07O4	0	2.6122	7.23384	24.3171	32.3009	30.382	3.154	0	0	0	0
2000	1055	0.001257	0.002516	-7.4367	0.000262	0.001144	Fe''0.91Mg0.17Fe'''0.65Al0.30Cr0.90Ti0.07O4	0	2.6571	7.19283	24.4598	32.1066	30.4594	3.12417	0	0	0	0
2000	1054	0.001256	0.002513	-7.41756	0.000262	0.001142	Fe''0.91Mg0.16Fe'''0.66Al0.30Cr0.90Ti0.07O4	0	2.70307	7.15157	24.6043	31.9091	30.5375	3.09454	0	0	0	0
2000	1053	0.001255	0.00251	-7.39878	0.000262	0.001141	Fe''0.91Mg0.16Fe'''0.66Al0.30Cr0.89Ti0.07O4	0	2.75013	7.11003	24.7504	31.7082	30.6161	3.06512	0	0	0	0
2000	1052	0.001254	0.002508	-7.38035	0.000261	0.001139	Fe''0.91Mg0.16Fe'''0.67Al0.30Cr0.89Ti0.07O4	0	2.79834	7.06821	24.8983	31.5039	30.6953	3.0359	0	0	0	0
2000	1051	0.001253	0.002505	-7.36229	0.000261	0.001138	Fe''0.92Mg0.16Fe'''0.67Al0.29Cr0.88Ti0.08O4	0	2.84772	7.02608	25.0479	31.2961	30.7753	3.00688	0	0	0	0
2000	1050	0.001252	0.002503	-7.34458	0.000261	0.001136	Fe''0.92Mg0.16Fe'''0.68Al0.29Cr0.88Ti0.08O4	0	2.89832	6.98362	25.1993	31.0848	30.8559	2.97806	0	0	0	0
2000	1049	0.001251	0.002501	-7.32724	0.000261	0.001135	Fe''0.92Mg0.16Fe'''0.68Al0.29Cr0.87Ti0.08O4	0	2.95018	6.94083	25.3525	30.8697	30.9374	2.94942	0	0	0	0
2000	1048	0.001251	0.002499	-7.31027	0.00026	0.001134	Fe''0.93Mg0.16Fe'''0.68Al0.29Cr0.86Ti0.08O4	0	3.00334	6.89766	25.5074	30.651	31.0196	2.92097	0	0	0	0
2000	1047	0.00125	0.002497	-7.29366	0.00026	0.001133	Fe''0.93Mg0.15Fe'''0.69Al0.29Cr0.86Ti0.08O4	0	3.05786	6.85412	25.6642	30.4284	31.1027	2.89271	0	0	0	0
2000	1046	0.001249	0.002495	-7.27744	0.00026	0.001132	Fe''0.93Mg0.15Fe'''0.69Al0.29Cr0.85Ti0.08O4	0	3.11379	6.81018	25.8229	30.2019	31.1866	2.86462	0	0	0	0
2000	1045	0.001249	0.002494	-7.2616	0.00026	0.001131	Fe''0.93Mg0.15Fe'''0.70Al0.28Cr0.85Ti0.09O4	0	3.17116	6.76581	25.9833	29.9714	31.2716	2.83671	0	0	0	0
2000	1044	0.001248	0.002493	-7.24615	0.00026	0.00113	Fe''0.94Mg0.15Fe'''0.70Al0.28Cr0.84Ti0.09O4	0	3.23004	6.721	26.1457	29.7368	31.3575	2.80897	0	0	0	0
2000	1043	0.001248	0.002491	-7.23109	0.000259	0.001129	Fe''0.94Mg0.15Fe'''0.71Al0.28Cr0.83Ti0.09O4	0	3.29048	6.67574	26.3099	29.4981	31.4444	2.78141	0	0	0	0
2000	1042	0.001247	0.00249	-7.21644	0.000259	0.001128	Fe''0.94Mg0.15Fe'''0.71Al0.28Cr0.83Ti0.09O4	0	3.35254	6.62999	26.476	29.255	31.5325	2.75401	0	0	0	0
2000	1041	0.001247	0.00249	-7.2022	0.000259	0.001128	Fe''0.95Mg0.15Fe'''0.72Al0.28Cr0.82Ti0.09O4	0	3.41627	6.58373	26.6439	29.0076	31.6217	2.72677	0	0	0	0
2000	1040	0.001247	0.002489	-7.18839	0.000259	0.001127	Fe''0.95Mg0.14Fe'''0.72Al0.28Cr0.81Ti0.09O4	0	3.48174	6.53695	26.8138	28.7558	31.7121	2.69969	0	0	0	0
2000	1039	0.001247	0.002489	-7.17501	0.000259	0.001127	Fe''0.95Mg0.14Fe'''0.73Al0.27Cr0.81Ti0.10O4	0	3.54901	6.48963	26.9855	28.4994	31.8038	2.67277	0	0	0	0
2000	1038	0.001247	0.002488	-7.16207	0.000259	0.001126	Fe''0.96Mg0.14Fe'''0.73Al0.27Cr0.80Ti0.10O4	0	3.61815	6.44175	27.159	28.2383	31.8967	2.64601	0	0	0	0
2000	1037	0.001247	0.002488	-7.1496	0.000259	0.001126	Fe''0.96Mg0.14Fe'''0.74Al0.27Cr0.79Ti0.10O4	0	3.68922	6.39328	27.3344	27.9725	31.9911	2.61939	0	0	0	0
2000	1036	0.001247	0.002488	-7.1376	0.000259	0.001126	Fe''0.96Mg0.14Fe'''0.74Al0.27Cr0.79Ti0.10O4	0	3.76229	6.3442	27.5117	27.702	32.087	2.59293	0	0	0	0
2000	1035	0.001247	0.002489	-7.12609	0.000259	0.001126	Fe''0.97Mg0.14Fe'''0.75Al0.27Cr0.78Ti0.10O4	0	3.83745	6.29449	27.6907	27.4265	32.1843	2.56661	0	0	0	0
2000	1034	0.001248	0.002489	-7.11509	0.000259	0.001125	Fe''0.97Mg0.14Fe'''0.75Al0.26Cr0.77Ti0.11O4	0	3.91476	6.24414	27.8714	27.146	32.2833	2.54044	0	0	0	0
2000	1033	0.001248	0.00249	-7.10461	0.000259	0.001126	Fe''0.97Mg0.13Fe'''0.76Al0.26Cr0.76Ti0.11O4	0	3.99429	6.19313	28.0539	26.8604	32.3839	2.51441	0	0	0	0
2000	1032	0.001249	0.002491	-7.09467	0.000259	0.001126	Fe''0.98Mg0.13Fe'''0.76Al0.26Cr0.76Ti0.11O4	0	4.07614	6.14143	28.238	26.5697	32.4862	2.48851	0	0	0	0
2000	1031	0.00125	0.002492	-7.0853	0.000259	0.001126	Fe''0.98Mg0.13Fe'''0.77Al0.26Cr0.75Ti0.11O4	0	4.16037	6.08903	28.4237	26.2738	32.5904	2.46276	0	0	0	0
2000	1030	0.00125	0.002494	-7.07652	0.000259	0.001126	Fe''0.98Mg0.13Fe'''0.77Al0.26Cr0.74Ti0.11O4	0	4.24707	6.03591	28.6109	25.9726	32.6964	2.43714	0	0	0	0
2000	1029	0.001251	0.002496	-7.06835	0.000259	0.001127	Fe''0.99Mg0.13Fe'''0.78Al0.25Cr0.73Ti0.12O4	0	4.33633	5.98206	28.7996	25.666	32.8043	2.41166	0	0	0	0
2000	1028	0.001253	0.002498	-7.06081	0.00026	0.001128	Fe''0.99Mg0.13Fe'''0.79Al0.25Cr0.72Ti0.12O4	0	4.42823	5.92746	28.9895	25.3541	32.9143	2.38631	0	0	0	0
2000	1027	0.001254	0.0025	-7.05394	0.00026	0.001128	Fe''1.00Mg0.13Fe'''0.79Al0.25Cr0.71Ti0.12O4	0	4.52285	5.8721	29.1808	25.0367	33.0265	2.3611	0	0	0	0
2000	1026	0.001255	0.002503	-7.04777	0.00026	0.001129	Fe''1.00Mg0.13Fe'''0.80Al0.25Cr0.70Ti0.13O4	0	4.62029	5.81597	29.3731	24.7139	33.1408	2.33601	0	0	0	0
2000	1025	0.001257	0.002505	-7.04232	0.00026	0.00113	Fe''1.00Mg0.12Fe'''0.80Al0.24Cr0.70Ti0.13O4	0	4.72062	5.75906	29.5664	24.3855	33.2573	2.31106	0	0	0	0
2000	1024	0.001258	0.002509	-7.03762	0.000261	0.001131	Fe''1.01Mg0.12Fe'''0.81Al0.24Cr0.69Ti0.13O4	0	4.82394	5.70136	29.7605	24.0517	33.3763	2.28624	0	0	0	0
2000	1023	0.00126	0.002512	-7.03372	0.000261	0.001133	Fe''1.01Mg0.12Fe'''0.81Al0.24Cr0.68Ti0.13O4	0	4.93032	5.64287	29.9553	23.7124	33.4976	2.26155	0	0	0	0
2000	1022	0.001262	0.002516	-7.03065	0.000261	0.001134	Fe''1.02Mg0.12Fe'''0.82Al0.24Cr0.67Ti0.14O4	0	5.03986	5.58359	30.1505	23.3676	33.6215	2.237	0	0	0	0
2000	1021	0.001264	0.00252	-7.02844	0.000262	0.001136	Fe''1.02Mg0.12Fe'''0.83Al0.24Cr0.66Ti0.14O4	0	5.15263	5.52352	30.346	23.0174	33.7479	2.21257	0	0	0	0
2000	1020	0.001267	0.002525	-7.02714	0.000262	0.001138	Fe''1.03Mg0.12Fe'''0.83Al0.23Cr0.65Ti0.14O4	0	5.26872	5.46267	30.5416	22.6618	33.877	2.18829	0	0	0	0
2000	1019	0.001269	0.00253	-7.02678	0.000263	0.00114	Fe''1.03Mg0.12Fe'''0.84Al0.23Cr0.64Ti0.15O4	0	5.38819	5.40104	30.737	22.3009	34.0088	2.16413	0	0	0	0
2000	1018	0.001272	0.002535	-7.02741	0.000263	0.001142	Fe''1.03Mg0.12Fe'''0.84Al0.23Cr0.63Ti0.15O4	0	5.51111	5.33865	30.9319	21.9348	34.1434	2.14012	0	0	0	0
2000	1017	0.001275	0.002541	-7.02907	0.000264	0.001144	Fe''1.04Mg0.11Fe'''0.85Al0.23Cr0.62Ti0.15O4	0	5.63755	5.27552	31.1262	21.5636	34.2808	2.11624	0	0	0	0
2000	1016	0.001278	0.002547	-7.03181	0.000264	0.001147	Fe''1.04Mg0.11Fe'''0.85Al0.22Cr0.61Ti0.16O4	0	5.76757	5.21167	31.3195	21.1876	34.4212	2.09251	0	0	0	0
2000	1015	0.001281	0.002553	-7.03567	0.000265	0.001149	Fe''1.05Mg0.11Fe'''0.86Al0.22Cr0.60Ti0.16O4	0	5.90122	5.14712	31.5116	20.8067	34.5644	2.06893	0	0	0	0
2000	1014	0.001285	0.00256	-7.04071	0.000266	0.001152	Fe''1.05Mg0.11Fe'''0.87Al0.22Cr0.59Ti0.16O4	0	6.03853	5.08192	31.7021	20.4213	34.7107	2.04549	0	0	0	0
2000	1013	0.001289	0.002567	-7.04697	0.000266	0.001156	Fe''1.06Mg0.11Fe'''0.87Al0.21Cr0.58Ti0.17O4	0	6.17954	5.01608	31.8906	20.0315	34.86	2.02221	0	0	0	0
2000	1012	0.001293	0.002575	-7.05449	0.000267	0.001159	Fe''1.06Mg0.11Fe'''0.88Al0.21Cr0.56Ti0.17O4	0	6.32426	4.94966	32.077	19.6376	35.0124	1.99908	0	0	0	0
2000	1011	0.001297	0.002584	-7.06333	0.000268	0.001163	Fe''1.07Mg0.11Fe'''0.88Al0.21Cr0.55Ti0.18O4	0	6.47272	4.88269	32.2608	19.2399	35.1678	1.97612	0	0	0	0
2000	1010	0.001301	0.002592	-7.07354	0.000269	0.001166	Fe''1.08Mg0.11Fe'''0.89Al0.21Cr0.54Ti0.18O4	0	6.6249	4.81524	32.4417	18.8386	35.3263	1.95332	0	0	0	0
2000	1009	0.001306	0.002602	-7.08517	0.00027	0.00117	Fe''1.08Mg0.10Fe'''0.89Al0.20Cr0.53Ti0.19O4	0	6.78079	4.74735	32.6193	18.434	35.4878	1.93069	0	0	0	0
2000	1008	0.001311	0.002611	-7.09826	0.000271	0.001175	Fe''1.09Mg0.10Fe'''0.90Al0.20Cr0.52Ti0.19O4	0	6.94036	4.67909	32.7933	18.0266	35.6524	1.90824	0	0	0	0
2000	1007	0.001316	0.002622	-7.11285	0.000272	0.001179	Fe''1.09Mg0.10Fe'''0.90Al0.20Cr0.51Ti0.19O4	0	7.10357	4.6105	32.9634	17.6165	35.82	1.88596	0	0	0	0
2000	1006	0.001322	0.002633	-7.12901	0.000273	0.001184	Fe''1.10Mg0.10Fe'''0.91Al0.20Cr0.50Ti0.20O4	0	7.27036	4.54167	33.1292	17.2043	35.9906	1.86387	0	0	0	0
2000	1005	0.001328	0.002644	-7.14677	0.000274	0.001189	Fe''1.10Mg0.10Fe'''0.91Al0.19Cr0.48Ti0.20O4	0	7.44065	4.47266	33.2904	16.7902	36.164	1.84197	0	0	0	0
2000	1004	0.001334	0.002656	-7.16616	0.000276	0.001195	Fe''1.11Mg0.10Fe'''0.92Al0.19Cr0.47Ti0.21O4	0	7.61436	4.40354	33.4467	16.3748	36.3404	1.82026	0	0	0	0
2000	1003	0.00134	0.002669	-7.18725	0.000277	0.0012	Fe''1.12Mg0.10Fe'''0.92Al0.19Cr0.46Ti0.21O4	0	7.79139	4.33438	33.5978	15.9582	36.5194	1.79876	0	0	0	0
2000	1002	0.001347	0.002682	-7.21005	0.000278	0.001206	Fe''1.12Mg0.10Fe'''0.93Al0.18Cr0.45Ti0.22O4	0	7.97163	4.26527	33.7434	15.5411	36.7012	1.77745	0	0	0	0
2000	1001	0.001354	0.002695	-7.23461	0.00028	0.001212	Fe''1.13Mg0.10Fe'''0.93Al0.18Cr0.44Ti0.22O4	0	8.15494	4.19626	33.8832	15.1238	36.8855	1.75635	0	0	0	0
2000	1000	0.001361	0.00271	-7.26096	0.000281	0.001219	Fe''1.13Mg0.09Fe'''0.94Al0.18Cr0.43Ti0.23O4	0	8.34118	4.12744	34.017	14.7067	37.0722	1.73546	0	0	0	0
2000	999	0.001369	0.002724	-7.28913	0.000283	0.001226	Fe''1.14Mg0.09Fe'''0.94Al0.18Cr0.41Ti0.23O4	0	8.5302	4.05888	34.1447	14.2902	37.2613	1.71478	0	0	0	0
2000	998	0.001376	0.00274	-7.31914	0.000284	0.001233	Fe''1.15Mg0.09Fe'''0.94Al0.17Cr0.40Ti0.24O4	0	8.72185	3.99065	34.266	13.8747	37.4525	1.69431	0	0	0	0
2000	997	0.001385	0.002756	-7.35101	0.000286	0.00124	Fe''1.15Mg0.09Fe'''0.95Al0.17Cr0.39Ti0.25O4	0	8.91594	3.92283	34.3808	13.4606	37.6458	1.67407	0	0	0	0
2000	996	0.001393	0.002772	-7.38478	0.000288	0.001248	Fe''1.16Mg0.09Fe'''0.95Al0.17Cr0.38Ti0.25O4	0	9.11231	3.85549	34.489	13.0483	37.8409	1.65404	0	0	0	0
2000	995	0.001402	0.00279	-7.42044	0.00029	0.001256	Fe''1.17Mg0.09Fe'''0.96Al0.16Cr0.37Ti0.26O4	0	9.31075	3.78868	34.5905	12.6381	38.0378	1.63423	0	0	0	0
2000	994	0.001411	0.002808	-7.45802	0.000291	0.001264	Fe''1.17Mg0.09Fe'''0.96Al0.16Cr0.36Ti0.26O4	0	9.5111	3.72247	34.6852	12.2304	38.2362	1.61465	0	0	0	0
2000	993	0.001421	0.002826	-7.49751	0.000293	0.001272	Fe''1.18Mg0.09Fe'''0.96Al0.16Cr0.34Ti0.27O4	0	9.71314	3.65692	34.7731	11.8255	38.4361	1.59528	0	0	0	0
2000	992	0.00143	0.002845	-7.53894	0.000295	0.001281	Fe''1.19Mg0.09Fe'''0.96Al0.16Cr0.33Ti0.27O4	0	9.91669	3.59208	34.8542	11.4237	38.6372	1.57614	0	0	0	0
2000	991	0.001441	0.002865	-7.5823	0.000298	0.00129	Fe''1.19Mg0.09Fe'''0.97Al0.15Cr0.32Ti0.28O4	0	10.1215	3.52802	34.9286	11.0253	38.8393	1.55722	0	0	0	0
2000	990	0.001451	0.002885	-7.62758	0.0003	0.0013	Fe''1.20Mg0.08Fe'''0.97Al0.15Cr0.31Ti0.29O4	0	10.3275	3.46476	34.9963	10.6306	39.0424	1.53851	0	0	0	0
2000	989	0.001462	0.002906	-7.6748	0.000302	0.001309	Fe''1.21Mg0.08Fe'''0.97Al0.15Cr0.30Ti0.29O4	0	10.5344	3.40235	35.0574	10.2397	39.2461	1.52003	0	0	0	0
2000	988	0.001473	0.002927	-7.72394	0.000304	0.001319	Fe''1.22Mg0.08Fe'''0.97Al0.15Cr0.29Ti0.30O4	0	10.742	3.34084	35.1119	9.85299	39.4505	1.50176	0	0	0	0
2000	987	0.001484	0.002949	-7.77501	0.000307	0.001329	Fe''1.22Mg0.08Fe'''0.97Al0.14Cr0.28Ti0.30O4	0	10.9502	3.28025	35.1601	9.47057	39.6552	1.48371	0	0	0	0
2000	986	0.001496	0.002972	-7.82799	0.000309	0.00134	Fe''1.23Mg0.08Fe'''0.98Al0.14Cr0.26Ti0.31O4	0	11.1587	3.22062	35.202	9.09262	39.8602	1.46587	0	0	0	0
2000	985	0.001508	0.002995	-7.88288	0.000311	0.001351	Fe''1.24Mg0.08Fe'''0.98Al0.14Cr0.25Ti0.32O4	0	11.3674	3.16196	35.2378	8.71931	40.0653	1.44824	0	0	0	0
2000	984	0.00152	0.003019	-7.93968	0.000314	0.001362	Fe''1.24Mg0.08Fe'''0.98Al0.13Cr0.24Ti0.32O4	0	11.5761	3.1043	35.2677	8.35076	40.2703	1.43081	0	0	0	0
2000	983	0.001533	0.003043	-7.99839	0.000317	0.001373	Fe''1.25Mg0.08Fe'''0.98Al0.13Cr0.23Ti0.33O4	0	11.7847	3.04766	35.2919	7.98708	40.4751	1.41359	0	0	0	0
2000	982	0.001546	0.003068	-8.05901	0.000319	0.001385	Fe''1.26Mg0.08Fe'''0.98Al0.13Cr0.22Ti0.33O4	0	11.9929	2.99204	35.3105	7.62836	40.6796	1.39657	0	0	0	0
2000	981	0.001559	0.003093	-8.12155	0.000322	0.001397	Fe''1.26Mg0.08Fe'''0.98Al0.13Cr0.21Ti0.34O4	0	12.2007	2.93747	35.3238	7.27469	40.8836	1.37975	0	0	0	0
2000	980	0.001573	0.003119	-8.18604	0.000325	0.001409	Fe''1.27Mg0.08Fe'''0.98Al0.13Cr0.20Ti0.34O4	0	12.4078	2.88394	35.332	6.92611	41.087	1.36312	0	0	0	0
2000	979	0.001587	0.003146	-8.25249	0.000328	0.001422	Fe''1.28Mg0.07Fe'''0.98Al0.12Cr0.19Ti0.35O4	0	12.6143	2.83146	35.3352	6.58268	41.2897	1.34668	0	0	0	0
2000	978	0.001601	0.003173	-8.32096	0.000331	0.001435	Fe''1.28Mg0.07Fe'''0.98Al0.12Cr0.18Ti0.36O4	0	12.8198	2.78002	35.3338	6.24443	41.4915	1.33042	0	0	0	0
2000	977	0.001616	0.003201	-8.39151	0.000334	0.001448	Fe''1.29Mg0.07Fe'''0.98Al0.12Cr0.17Ti0.36O4	0	13.0244	2.72964	35.3278	5.91138	41.6925	1.31435	0	0	0	0
2000	976	0.001631	0.00323	-8.46422	0.000337	0.001462	Fe''1.30Mg0.07Fe'''0.98Al0.12Cr0.16Ti0.37O4	0	13.2278	2.6803	35.3176	5.58352	41.8923	1.29846	0	0	0	0
2000	975	0.001646	0.003259	-8.53921	0.00034	0.001476	Fe''1.30Mg0.07Fe'''0.98Al0.11Cr0.15Ti0.37O4	0	13.4301	2.63201	35.3033	5.26088	42.0911	1.28275	0	0	0	0
2000	974	0.001662	0.003289	-8.61663	0.000343	0.00149	Fe''1.31Mg0.07Fe'''0.98Al0.11Cr0.14Ti0.38O4	0	13.631	2.58474	35.2851	4.94343	42.2886	1.2672	0	0	0	0
2000	973	0.001678	0.00332	-8.69671	0.000347	0.001505	Fe''1.32Mg0.07Fe'''0.98Al0.11Cr0.14Ti0.39O4	0	13.8304	2.5385	35.2633	4.63116	42.4847	1.25183	0	0	0	0
2000	972	0.001695	0.003352	-8.77972	0.00035	0.00152	Fe''1.32Mg0.07Fe'''0.98Al0.11Cr0.13Ti0.39O4	0	14.0284	2.49327	35.2381	4.32405	42.6795	1.23662	0	0	0	0
2000	971	0.001712	0.003386	-8.86604	0.000354	0.001535	Fe''1.33Mg0.07Fe'''0.98Al0.11Cr0.12Ti0.40O4	0	14.2248	2.44905	35.2097	4.02208	42.8728	1.22157	0	0	0	0
2000	970	0.00173	0.00342	-8.95616	0.000358	0.001552	Fe''1.34Mg0.07Fe'''0.98Al0.11Cr0.11Ti0.40O4	0	14.4195	2.40581	35.1783	3.72522	43.0645	1.20668	0	0	0	0
2000	969	0.001749	0.003456	-9.05076	0.000362	0.001569	Fe''1.34Mg0.07Fe'''0.98Al0.10Cr0.10Ti0.41O4	0	14.6123	2.36356	35.1441	3.43345	43.2546	1.19195	0	0	0	0
2000	968	0.001769	0.003494	-9.15075	0.000366	0.001587	Fe''1.35Mg0.07Fe'''0.98Al0.10Cr0.09Ti0.41O4	0	14.8034	2.32227	35.1073	3.14675	43.4429	1.17737	0	0	0	0
2000	967	0.00179	0.003534	-9.25738	0.00037	0.001606	Fe''1.35Mg0.06Fe'''0.98Al0.10Cr0.08Ti0.42O4	0	14.9924	2.28194	35.0681	2.8651	43.6295	1.16295	0	0	0	0
2000	966	0.001813	0.003577	-9.37241	0.000375	0.001626	Fe''1.36Mg0.06Fe'''0.98Al0.10Cr0.08Ti0.42O4	0	15.1795	2.24255	35.0267	2.58849	43.8142	1.14867	0	0	0	0
2000	965	0.001838	0.003624	-9.49836	0.00038	0.001649	Fe''1.37Mg0.06Fe'''0.98Al0.10Cr0.07Ti0.43O4	0	15.3643	2.2041	34.9833	2.31694	43.9968	1.13453	0	0	0	0
2000	964	0.001865	0.003677	-9.63893	0.000386	0.001674	Fe''1.37Mg0.06Fe'''0.98Al0.09Cr0.06Ti0.43O4	0	15.5469	2.16658	34.9381	2.05048	44.1774	1.12054	0	0	0	0
2000	963	0.001897	0.003737	-9.79977	0.000392	0.001702	Fe''1.38Mg0.06Fe'''0.98Al0.09Cr0.05Ti0.44O4	0	15.727	2.12998	34.8914	1.78919	44.3557	1.1067	0	0	0	0
2000	962	0.001934	0.003809	-9.98991	0.0004	0.001736	Fe''1.38Mg0.06Fe'''0.97Al0.09Cr0.05Ti0.44O4	0	15.9045	2.09431	34.8435	1.53321	44.5315	1.093	0	0	0	0
2000	961	0.00198	0.003897	-10.2245	0.00041	0.001777	Fe''1.39Mg0.06Fe'''0.97Al0.09Cr0.04Ti0.45O4	0	16.0789	2.05959	34.7946	1.28281	44.7046	1.07944	0	0	0	0
2000	960	0.00204	0.004012	-10.5311	0.000422	0.001831	Fe''1.40Mg0.06Fe'''0.97Al0.09Cr0.03Ti0.45O4	0	16.2499	2.02585	34.7453	1.03843	44.8745	1.06603	0	0	0	0
2000	959	0.002124	0.004175	-10.9646	0.000439	0.001906	Fe''1.40Mg0.06Fe'''0.97Al0.09Cr0.02Ti0.46O4	0	16.4165	1.99317	34.6961	0.800959	45.0404	1.05279	0	0	0	0
2000	958	0.002257	0.004434	-11.6505	0.000467	0.002026	Fe''1.41Mg0.06Fe'''0.97Al0.09Cr0.02Ti0.46O4	0	16.5772	1.96172	34.6484	0.572203	45.2008	1.03972	0	0	0	0
2000	955	0.007151	0.014016	-36.8908	0.001479	0.006419	Fe''1.42Mg0.06Fe'''0.97Al0.08Cr0.00Ti0.47O4	0	16.9673	1.88099	34.5513	0	45.598	1.00239	0	0	0	0
2000	954	0.007755	0.015194	-39.9883	0.001604	0.006961	Fe''1.42Mg0.06Fe'''0.97Al0.08Cr0.00Ti0.47O4	0	16.9324	1.87419	34.6213	0	45.5796	0.992517	0	0	0	0
2000	953	0.007646	0.014972	-39.403	0.001581	0.006861	Fe''1.42Mg0.05Fe'''0.97Al0.08Cr0.00Ti0.47O4	0	16.8982	1.86735	34.6902	0	45.5616	0.982683	0	0	0	0
2000	952	0.007564	0.014805	-38.9622	0.001564	0.006787	Fe''1.42Mg0.05Fe'''0.97Al0.08Cr0.00Ti0.47O4	0	16.864	1.86052	34.7588	0	45.5437	0.972923	0	0	0	0
2000	951	0.007484	0.01464	-38.5278	0.001547	0.006715	Fe''1.42Mg0.05Fe'''0.98Al0.08Cr0.00Ti0.47O4	0	16.83	1.85371	34.8272	0	45.5258	0.963235	0	0	0	0
2000	950	0.007405	0.014478	-38.0997	0.001531	0.006643	Fe''1.42Mg0.05Fe'''0.98Al0.08Cr0.00Ti0.47O4	0	16.7962	1.84691	34.8953	0	45.508	0.953621	0	0	0	0
2000	949	0.007326	0.014318	-37.6777	0.001514	0.006572	Fe''1.42Mg0.05Fe'''0.98Al0.08Cr0.00Ti0.47O4	0	16.7625	1.84013	34.9631	0	45.4901	0.944078	0	0	0	0
2000	948	0.007249	0.01416	-37.2617	0.001498	0.006502	Fe''1.42Mg0.05Fe'''0.98Al0.08Cr0.00Ti0.47O4	0	16.729	1.83337	35.0307	0	45.4723	0.934606	0	0	0	0
2000	947	0.007173	0.014005	-36.8517	0.001482	0.006433	Fe''1.42Mg0.05Fe'''0.98Al0.08Cr0.00Ti0.47O4	0	16.6956	1.82662	35.098	0	45.4546	0.925205	0	0	0	0
2000	946	0.007098	0.013852	-36.4474	0.001466	0.006365	Fe''1.42Mg0.05Fe'''0.99Al0.08Cr0.00Ti0.47O4	0	16.6624	1.81989	35.165	0	45.4369	0.915874	0	0	0	0
2000	945	0.007024	0.0137	-36.0489	0.001451	0.006297	Fe''1.42Mg0.05Fe'''0.99Al0.08Cr0.00Ti0.47O4	0	16.6293	1.81317	35.2317	0	45.4192	0.906613	0	0	0	0
2000	944	0.006951	0.013551	-35.6559	0.001435	0.006231	Fe''1.42Mg0.05Fe'''0.99Al0.08Cr0.00Ti0.47O4	0	16.5964	1.80646	35.2981	0	45.4016	0.89742	0	0	0	0
2000	943	0.006879	0.013404	-35.2683	0.00142	0.006166	Fe''1.42Mg0.05Fe'''0.99Al0.08Cr0.00Ti0.46O4	0	16.5637	1.79977	35.3642	0	45.384	0.888295	0	0	0	0
2000	942	0.006808	0.013259	-34.8862	0.001405	0.006101	Fe''1.41Mg0.05Fe'''0.99Al0.08Cr0.00Ti0.46O4	0	16.5311	1.79309	35.43	0	45.3665	0.879237	0	0	0	0
2000	941	0.006738	0.013116	-34.5093	0.001391	0.006038	Fe''1.41Mg0.05Fe'''1.00Al0.08Cr0.00Ti0.46O4	0	16.4988	1.78643	35.4955	0	45.3491	0.870246	0	0	0	0
2000	940	0.006668	0.012974	-34.1376	0.001376	0.005975	Fe''1.41Mg0.05Fe'''1.00Al0.08Cr0.00Ti0.46O4	0	16.4665	1.77978	35.5607	0	45.3317	0.861321	0	0	0	0
2000	939	0.0066	0.012835	-33.771	0.001362	0.005913	Fe''1.41Mg0.05Fe'''1.00Al0.08Cr0.00Ti0.46O4	0	16.4345	1.77315	35.6255	0	45.3144	0.852462	0	0	0	0
2000	938	0.006532	0.012697	-33.4093	0.001348	0.005852	Fe''1.41Mg0.05Fe'''1.00Al0.08Cr0.00Ti0.46O4	0	16.4027	1.76652	35.6901	0	45.2971	0.843668	0	0	0	0
2000	937	0.006466	0.012562	-33.0526	0.001334	0.005791	Fe''1.41Mg0.05Fe'''1.00Al0.08Cr0.00Ti0.46O4	0	16.371	1.75991	35.7543	0	45.2799	0.834939	0	0	0	0
2000	936	0.0064	0.012428	-32.7006	0.00132	0.005732	Fe''1.41Mg0.05Fe'''1.01Al0.08Cr0.00Ti0.46O4	0	16.3395	1.75331	35.8181	0	45.2628	0.826273	0	0	0	0
2000	935	0.006335	0.012295	-32.3534	0.001306	0.005673	Fe''1.41Mg0.05Fe'''1.01Al0.08Cr0.00Ti0.46O4	0	16.3082	1.74673	35.8816	0	45.2458	0.81767	0	0	0	0
2000	934	0.006271	0.012165	-32.0108	0.001293	0.005615	Fe''1.41Mg0.05Fe'''1.01Al0.08Cr0.00Ti0.46O4	0	16.2771	1.74016	35.9448	0	45.2288	0.80913	0	0	0	0
2000	933	0.006208	0.012036	-31.6727	0.00128	0.005558	Fe''1.41Mg0.04Fe'''1.01Al0.08Cr0.00Ti0.46O4	0	16.2461	1.73359	36.0076	0	45.212	0.800653	0	0	0	0
2000	932	0.006145	0.011909	-31.3392	0.001266	0.005501	Fe''1.41Mg0.04Fe'''1.01Al0.08Cr0.00Ti0.46O4	0	16.2154	1.72704	36.0701	0	45.1952	0.792236	0	0	0	0
2000	931	0.006083	0.011784	-31.01	0.001254	0.005445	Fe''1.41Mg0.04Fe'''1.02Al0.08Cr0.00Ti0.45O4	0	16.1849	1.72051	36.1322	0	45.1785	0.783881	0	0	0	0
2000	930	0.006022	0.01166	-30.6851	0.001241	0.00539	Fe''1.41Mg0.04Fe'''1.02Al0.08Cr0.00Ti0.45O4	0	16.1545	1.71398	36.194	0	45.1619	0.775586	0	0	0	0
2000	929	0.005962	0.011537	-30.3645	0.001228	0.005336	Fe''1.41Mg0.04Fe'''1.02Al0.08Cr0.00Ti0.45O4	0	16.1244	1.70746	36.2554	0	45.1454	0.767351	0	0	0	0
2000	928	0.005903	0.011417	-30.048	0.001216	0.005282	Fe''1.41Mg0.04Fe'''1.02Al0.07Cr0.00Ti0.45O4	0	16.0945	1.70096	36.3164	0	45.129	0.759175	0	0	0	0
2000	927	0.005844	0.011297	-29.7357	0.001203	0.005229	Fe''1.41Mg0.04Fe'''1.02Al0.07Cr0.00Ti0.45O4	0	16.0647	1.69447	36.377	0	45.1127	0.751059	0	0	0	0
2000	926	0.005786	0.01118	-29.4273	0.001191	0.005176	Fe''1.41Mg0.04Fe'''1.02Al0.07Cr0.00Ti0.45O4	0	16.0352	1.68798	36.4372	0	45.0966	0.743	0	0	0	0
2000	925	0.005729	0.011063	-29.1229	0.001179	0.005124	Fe''1.41Mg0.04Fe'''1.03Al0.07Cr0.00Ti0.45O4	0	16.0059	1.68151	36.4971	0	45.0805	0.734999	0	0	0	0
2000	924	0.005672	0.010949	-28.8224	0.001167	0.005073	Fe''1.41Mg0.04Fe'''1.03Al0.07Cr0.00Ti0.45O4	0	15.9768	1.67505	36.5566	0	45.0645	0.727055	0	0	0	0
2000	923	0.005616	0.010835	-28.5258	0.001156	0.005023	Fe''1.41Mg0.04Fe'''1.03Al0.07Cr0.00Ti0.45O4	0	15.9479	1.6686	36.6157	0	45.0487	0.719168	0	0	0	0
2000	922	0.005561	0.010723	-28.2329	0.001144	0.004973	Fe''1.41Mg0.04Fe'''1.03Al0.07Cr0.00Ti0.45O4	0	15.9193	1.66216	36.6743	0	45.0329	0.711337	0	0	0	0
2000	921	0.005506	0.010613	-27.9437	0.001133	0.004923	Fe''1.41Mg0.04Fe'''1.03Al0.07Cr0.00Ti0.45O4	0	15.8908	1.65572	36.7326	0	45.0173	0.703562	0	0	0	0
2000	920	0.005452	0.010504	-27.6581	0.001122	0.004875	Fe''1.41Mg0.04Fe'''1.04Al0.07Cr0.00Ti0.45O4	0	15.8626	1.6493	36.7905	0	45.0018	0.695842	0	0	0	0
2000	919	0.005399	0.010396	-27.3761	0.00111	0.004826	Fe''1.41Mg0.04Fe'''1.04Al0.07Cr0.00Ti0.45O4	0	15.8346	1.64289	36.8479	0	44.9865	0.688176	0	0	0	0
2000	918	0.005346	0.010289	-27.0976	0.001099	0.004779	Fe''1.41Mg0.04Fe'''1.04Al0.07Cr0.00Ti0.44O4	0	15.8068	1.63648	36.9049	0	44.9712	0.680565	0	0	0	0
2000	917	0.005294	0.010184	-26.8226	0.001089	0.004732	Fe''1.41Mg0.04Fe'''1.04Al0.07Cr0.00Ti0.44O4	0	15.7793	1.63009	36.9615	0	44.9561	0.673007	0	0	0	0
2000	916	0.005243	0.01008	-26.551	0.001078	0.004685	Fe''1.41Mg0.04Fe'''1.04Al0.07Cr0.00Ti0.44O4	0	15.7519	1.6237	37.0177	0	44.9411	0.665502	0	0	0	0
2000	915	0.005192	0.009977	-26.2828	0.001067	0.004639	Fe''1.41Mg0.04Fe'''1.04Al0.07Cr0.00Ti0.44O4	0	15.7249	1.61733	37.0735	0	44.9263	0.65805	0	0	0	0
2000	914	0.005142	0.009876	-26.0178	0.001057	0.004594	Fe''1.41Mg0.04Fe'''1.05Al0.07Cr0.00Ti0.44O4	0	15.698	1.61096	37.1288	0	44.9116	0.65065	0	0	0	0
2000	913	0.005092	0.009775	-25.7561	0.001046	0.004549	Fe''1.41Mg0.04Fe'''1.05Al0.07Cr0.00Ti0.44O4	0	15.6714	1.6046	37.1837	0	44.897	0.643302	0	0	0	0
2000	912	0.005043	0.009676	-25.4976	0.001036	0.004505	Fe''1.40Mg0.04Fe'''1.05Al0.07Cr0.00Ti0.44O4	0	15.645	1.59825	37.2381	0	44.8826	0.636005	0	0	0	0
2000	911	0.004994	0.009578	-25.2423	0.001026	0.004461	Fe''1.40Mg0.04Fe'''1.05Al0.07Cr0.00Ti0.44O4	0	15.6189	1.59191	37.2921	0	44.8684	0.628759	0	0	0	0
2000	910	0.004946	0.009482	-24.99	0.001016	0.004418	Fe''1.40Mg0.03Fe'''1.05Al0.07Cr0.00Ti0.44O4	0	15.593	1.58557	37.3456	0	44.8543	0.621563	0	0	0	0
2000	909	0.004899	0.009386	-24.7408	0.001006	0.004375	Fe''1.40Mg0.03Fe'''1.05Al0.07Cr0.00Ti0.44O4	0	15.5674	1.57925	37.3987	0	44.8403	0.614417	0	0	0	0
2000	908	0.004852	0.009291	-24.4946	0.000996	0.004333	Fe''1.40Mg0.03Fe'''1.06Al0.07Cr0.00Ti0.44O4	0	15.542	1.57293	37.4513	0	44.8265	0.607321	0	0	0	0
2000	907	0.004806	0.009198	-24.2513	0.000987	0.004291	Fe''1.40Mg0.03Fe'''1.06Al0.07Cr0.00Ti0.44O4	0	15.5168	1.56662	37.5035	0	44.8128	0.600273	0	0	0	0
2000	906	0.00476	0.009106	-24.011	0.000977	0.004249	Fe''1.40Mg0.03Fe'''1.06Al0.07Cr0.00Ti0.44O4	0	15.4919	1.56032	37.5552	0	44.7994	0.593273	0	0	0	0
2000	905	0.004714	0.009015	-23.7735	0.000968	0.004208	Fe''1.40Mg0.03Fe'''1.06Al0.07Cr0.00Ti0.44O4	0	15.4673	1.55402	37.6064	0	44.786	0.586322	0	0	0	0
2000	904	0.00467	0.008924	-23.5389	0.000958	0.004168	Fe''1.40Mg0.03Fe'''1.06Al0.07Cr0.00Ti0.44O4	0	15.4429	1.54774	37.6571	0	44.7729	0.579418	0	0	0	0
2000	903	0.004625	0.008835	-23.307	0.000949	0.004128	Fe''1.40Mg0.03Fe'''1.06Al0.07Cr0.00Ti0.43O4	0	15.4187	1.54146	37.7074	0	44.7599	0.572562	0	0	0	0
2000	902	0.004581	0.008747	-23.0778	0.00094	0.004089	Fe''1.40Mg0.03Fe'''1.06Al0.07Cr0.00Ti0.43O4	0	15.3949	1.53519	37.7572	0	44.747	0.565752	0	0	0	0
2000	901	0.004538	0.00866	-22.8514	0.000931	0.004049	Fe''1.40Mg0.03Fe'''1.07Al0.07Cr0.00Ti0.43O4	0	15.3712	1.52892	37.8065	0	44.7344	0.558988	0	0	0	0
2000	900	0.004495	0.008574	-22.6276	0.000922	0.004011	Fe''1.40Mg0.03Fe'''1.07Al0.07Cr0.00Ti0.43O4	0	15.3479	1.52266	37.8553	0	44.7219	0.55227	0	0	0	0
clinopyroxene_1	thermodynamic	data	and	composition:
Pressure	Temperature	mass	S	H	V	Cp	structure	formula	SiO2	TiO2	Al2O3	Fe2O3	Cr2O3	FeO	MgO	CaO	Na2O	K2O	H2O
2000	1197	0.186349	0.450905	-2343.26	0.057857	0.230802	cpx	Na0.01Ca0.29Fe''0.31Mg1.33Fe'''0.02Ti0.00Al0.12Si1.93O6	53.8899	0.0238144	2.78181	0.674098	0	10.2012	24.8472	7.50638	0.0755488	0	0
2000	1196	0.20023	0.484253	-2516.41	0.062147	0.247889	cpx	Na0.01Ca0.29Fe''0.31Mg1.33Fe'''0.02Ti0.00Al0.12Si1.93O6	53.8718	0.0241651	2.77634	0.67674	0	10.271	24.789	7.51501	0.0758943	0	0
2000	1195	0.193396	0.467493	-2429.18	0.060007	0.239326	cpx	Na0.01Ca0.29Fe''0.31Mg1.32Fe'''0.02Ti0.00Al0.12Si1.93O6	53.8538	0.0245145	2.77093	0.679368	0	10.3408	24.7311	7.52325	0.0762349	0	0
2000	1194	0.186898	0.451563	-2346.26	0.057972	0.231187	cpx	Na0.01Ca0.29Fe''0.31Mg1.32Fe'''0.02Ti0.00Al0.12Si1.93O6	53.8358	0.0248626	2.76559	0.681982	0	10.4105	24.6736	7.53108	0.0765708	0	0
2000	1193	0.180715	0.436408	-2267.39	0.056037	0.223444	cpx	Na0.01Ca0.29Fe''0.32Mg1.32Fe'''0.02Ti0.00Al0.12Si1.93O6	53.8179	0.0252094	2.7603	0.684583	0	10.4802	24.6164	7.53853	0.0769021	0	0
2000	1192	0.174827	0.42198	-2192.3	0.054194	0.216072	cpx	Na0.01Ca0.29Fe''0.32Mg1.32Fe'''0.02Ti0.00Al0.12Si1.93O6	53.7999	0.025555	2.75507	0.687171	0	10.5499	24.5596	7.54558	0.0772288	0	0
2000	1191	0.169215	0.408233	-2120.76	0.052438	0.209048	cpx	Na0.01Ca0.29Fe''0.32Mg1.31Fe'''0.02Ti0.00Al0.12Si1.93O6	53.7821	0.0258993	2.74989	0.689749	0	10.6195	24.5031	7.55226	0.077551	0	0
2000	1190	0.163863	0.395125	-2052.54	0.050763	0.202351	cpx	Na0.01Ca0.29Fe''0.32Mg1.31Fe'''0.02Ti0.00Al0.12Si1.93O6	53.7642	0.0262424	2.74477	0.692314	0	10.6892	24.4469	7.55855	0.0778687	0	0
2000	1189	0.158754	0.382617	-1987.45	0.049165	0.19596	cpx	Na0.01Ca0.29Fe''0.32Mg1.31Fe'''0.02Ti0.00Al0.12Si1.93O6	53.7464	0.0265842	2.7397	0.69487	0	10.7588	24.391	7.56447	0.0781822	0	0
2000	1188	0.153874	0.370674	-1925.3	0.047639	0.189858	cpx	Na0.01Ca0.29Fe''0.33Mg1.31Fe'''0.02Ti0.00Al0.12Si1.93O6	53.7287	0.0269247	2.73468	0.697415	0	10.8284	24.3354	7.57002	0.0784913	0	0
2000	1187	0.14921	0.359261	-1865.91	0.04618	0.184026	cpx	Na0.01Ca0.29Fe''0.33Mg1.30Fe'''0.02Ti0.00Al0.12Si1.93O6	53.7109	0.027264	2.72971	0.699951	0	10.8981	24.28	7.5752	0.0787962	0	0
2000	1186	0.144749	0.348349	-1809.13	0.044786	0.17845	cpx	Na0.01Ca0.29Fe''0.33Mg1.30Fe'''0.02Ti0.00Al0.12Si1.93O6	53.6932	0.027602	2.72479	0.702477	0	10.9678	24.225	7.58003	0.079097	0	0
2000	1185	0.14048	0.337908	-1754.81	0.043451	0.173115	cpx	Na0.01Ca0.29Fe''0.33Mg1.30Fe'''0.02Ti0.00Al0.12Si1.93O6	53.6756	0.0279387	2.71992	0.704995	0	11.0375	24.1702	7.5845	0.0793937	0	0
2000	1184	0.136391	0.327912	-1702.79	0.042173	0.168007	cpx	Na0.01Ca0.29Fe''0.33Mg1.30Fe'''0.02Ti0.00Al0.12Si1.93O6	53.6579	0.0282741	2.71509	0.707506	0	11.1073	24.1156	7.58861	0.0796863	0	0
2000	1183	0.132473	0.318336	-1652.97	0.040949	0.163114	cpx	Na0.01Ca0.29Fe''0.34Mg1.29Fe'''0.02Ti0.00Al0.12Si1.93O6	53.6402	0.0286083	2.71031	0.710008	0	11.1772	24.0613	7.59238	0.079975	0	0
2000	1182	0.128717	0.309158	-1605.21	0.039775	0.158424	cpx	Na0.01Ca0.29Fe''0.34Mg1.29Fe'''0.02Ti0.00Al0.12Si1.93O6	53.6226	0.0289413	2.70558	0.712504	0	11.2471	24.0072	7.5958	0.0802597	0	0
2000	1181	0.125113	0.300355	-1559.41	0.03865	0.153925	cpx	Na0.01Ca0.29Fe''0.34Mg1.29Fe'''0.02Ti0.00Al0.11Si1.93O6	53.605	0.0292729	2.70089	0.714993	0	11.317	23.9534	7.59888	0.0805405	0	0
2000	1180	0.121654	0.291907	-1515.46	0.037569	0.149608	cpx	Na0.01Ca0.29Fe''0.34Mg1.29Fe'''0.02Ti0.00Al0.11Si1.93O6	53.5874	0.0296033	2.69625	0.717475	0	11.3871	23.8998	7.60163	0.0808175	0	0
2000	1179	0.118332	0.283796	-1473.26	0.036532	0.145463	cpx	Na0.01Ca0.29Fe''0.35Mg1.28Fe'''0.02Ti0.00Al0.11Si1.93O6	53.5698	0.0299324	2.69164	0.719952	0	11.4572	23.8463	7.60404	0.0810908	0	0
2000	1178	0.115139	0.276005	-1432.72	0.035535	0.141481	cpx	Na0.01Ca0.29Fe''0.35Mg1.28Fe'''0.02Ti0.00Al0.11Si1.93O6	53.5522	0.0302603	2.68708	0.722424	0	11.5274	23.7931	7.60613	0.0813603	0	0
2000	1177	0.11207	0.268516	-1393.76	0.034577	0.137654	cpx	Na0.01Ca0.29Fe''0.35Mg1.28Fe'''0.02Ti0.00Al0.11Si1.94O6	53.5346	0.0305868	2.68256	0.724891	0	11.5977	23.7401	7.60789	0.0816261	0	0
2000	1176	0.109118	0.261315	-1356.29	0.033656	0.133973	cpx	Na0.01Ca0.29Fe''0.35Mg1.28Fe'''0.02Ti0.00Al0.11Si1.94O6	53.517	0.0309121	2.67808	0.727353	0	11.6682	23.6872	7.60933	0.0818883	0	0
2000	1175	0.106277	0.254387	-1320.25	0.032769	0.130432	cpx	Na0.01Ca0.29Fe''0.36Mg1.27Fe'''0.02Ti0.00Al0.11Si1.94O6	53.4995	0.0312361	2.67364	0.729811	0	11.7387	23.6345	7.61046	0.0821468	0	0
2000	1174	0.103542	0.247718	-1285.55	0.031916	0.127023	cpx	Na0.01Ca0.30Fe''0.36Mg1.27Fe'''0.02Ti0.00Al0.11Si1.94O6	53.4819	0.0315588	2.66924	0.732265	0	11.8094	23.582	7.61127	0.0824018	0	0
2000	1173	0.100907	0.241296	-1252.14	0.031094	0.123741	cpx	Na0.01Ca0.30Fe''0.36Mg1.27Fe'''0.02Ti0.00Al0.11Si1.94O6	53.4643	0.0318802	2.66488	0.734717	0	11.8802	23.5297	7.61177	0.0826533	0	0
2000	1172	0.098368	0.23511	-1219.96	0.030302	0.120579	cpx	Na0.01Ca0.30Fe''0.36Mg1.27Fe'''0.02Ti0.00Al0.11Si1.94O6	53.4467	0.0322004	2.66055	0.737165	0	11.9511	23.4775	7.61196	0.0829013	0	0
2000	1171	0.095921	0.229147	-1188.93	0.029539	0.117531	cpx	Na0.01Ca0.30Fe''0.36Mg1.26Fe'''0.02Ti0.00Al0.11Si1.94O6	53.4291	0.0325192	2.65626	0.73961	0	12.0221	23.4254	7.61186	0.0831458	0	0
2000	1170	0.09356	0.223398	-1159.02	0.028803	0.114592	cpx	Na0.01Ca0.30Fe''0.37Mg1.26Fe'''0.02Ti0.00Al0.11Si1.94O6	53.4115	0.0328368	2.65201	0.742054	0	12.0933	23.3735	7.61145	0.083387	0	0
2000	1169	0.091282	0.217852	-1130.17	0.028093	0.111756	cpx	Na0.01Ca0.30Fe''0.37Mg1.26Fe'''0.02Ti0.00Al0.11Si1.94O6	53.3938	0.033153	2.6478	0.744495	0	12.1647	23.3216	7.61075	0.0836248	0	0
2000	1168	0.089083	0.212499	-1102.32	0.027407	0.10902	cpx	Na0.01Ca0.30Fe''0.37Mg1.26Fe'''0.02Ti0.00Al0.11Si1.94O6	53.3762	0.0334679	2.64362	0.746936	0	12.2362	23.27	7.60976	0.0838592	0	0
2000	1167	0.08696	0.207333	-1075.44	0.026745	0.106379	cpx	Na0.01Ca0.30Fe''0.37Mg1.26Fe'''0.02Ti0.00Al0.11Si1.94O6	53.3585	0.0337816	2.63947	0.749375	0	12.3079	23.2184	7.60847	0.0840903	0	0
2000	1166	0.084908	0.202343	-1049.47	0.026106	0.103827	cpx	Na0.01Ca0.30Fe''0.38Mg1.25Fe'''0.02Ti0.00Al0.11Si1.94O6	53.3409	0.0340939	2.63536	0.751813	0	12.3797	23.1669	7.60691	0.0843182	0	0
2000	1165	0.082926	0.197522	-1024.39	0.025489	0.101362	cpx	Na0.01Ca0.30Fe''0.38Mg1.25Fe'''0.02Ti0.00Al0.11Si1.94O6	53.3232	0.034405	2.63129	0.754251	0	12.4517	23.1156	7.60506	0.0845428	0	0
2000	1164	0.08101	0.192862	-1000.15	0.024892	0.09898	cpx	Na0.01Ca0.30Fe''0.38Mg1.25Fe'''0.02Ti0.00Al0.11Si1.94O6	53.3055	0.0347147	2.62724	0.756689	0	12.5239	23.0643	7.60294	0.0847642	0	0
2000	1163	0.079156	0.188357	-976.71	0.024314	0.096677	cpx	Na0.01Ca0.30Fe''0.38Mg1.25Fe'''0.02Ti0.00Al0.11Si1.94O6	53.2877	0.0350231	2.62323	0.759127	0	12.5963	23.0131	7.60054	0.0849825	0	0
2000	1162	0.077363	0.184001	-954.041	0.023756	0.094449	cpx	Na0.01Ca0.30Fe''0.38Mg1.24Fe'''0.02Ti0.00Al0.11Si1.94O6	53.27	0.0353302	2.61925	0.761565	0	12.6688	22.962	7.59786	0.0851975	0	0
2000	1161	0.075628	0.179785	-932.109	0.023216	0.092293	cpx	Na0.01Ca0.30Fe''0.39Mg1.24Fe'''0.02Ti0.00Al0.11Si1.94O6	53.2522	0.0356359	2.61531	0.764005	0	12.7416	22.911	7.59493	0.0854095	0	0
2000	1160	0.073948	0.175706	-910.881	0.022693	0.090207	cpx	Na0.01Ca0.30Fe''0.39Mg1.24Fe'''0.02Ti0.00Al0.11Si1.94O6	53.2343	0.0359404	2.61139	0.766446	0	12.8145	22.86	7.59172	0.0856184	0	0
2000	1159	0.072322	0.171756	-890.33	0.022187	0.088187	cpx	Na0.01Ca0.30Fe''0.39Mg1.24Fe'''0.02Ti0.00Al0.11Si1.94O6	53.2165	0.0362435	2.60751	0.768889	0	12.8877	22.8091	7.58826	0.0858242	0	0
2000	1158	0.070746	0.167931	-870.428	0.021696	0.086231	cpx	Na0.01Ca0.30Fe''0.39Mg1.23Fe'''0.02Ti0.00Al0.11Si1.94O6	53.1986	0.0365453	2.60366	0.771333	0	12.9611	22.7582	7.58453	0.086027	0	0
2000	1157	0.069219	0.164226	-851.147	0.021221	0.084335	cpx	Na0.01Ca0.30Fe''0.40Mg1.23Fe'''0.02Ti0.00Al0.11Si1.94O6	53.1807	0.0368457	2.59984	0.77378	0	13.0346	22.7074	7.58055	0.0862268	0	0
2000	1156	0.067739	0.160636	-832.464	0.020761	0.082499	cpx	Na0.01Ca0.30Fe''0.40Mg1.23Fe'''0.02Ti0.00Al0.11Si1.94O6	53.1627	0.0371449	2.59605	0.776229	0	13.1084	22.6567	7.57632	0.0864236	0	0
2000	1155	0.066304	0.157155	-814.353	0.020314	0.080719	cpx	Na0.01Ca0.30Fe''0.40Mg1.23Fe'''0.02Ti0.00Al0.11Si1.94O6	53.1447	0.0374427	2.59229	0.778681	0	13.1825	22.6059	7.57184	0.0866175	0	0
2000	1154	0.064913	0.153781	-796.793	0.019882	0.078992	cpx	Na0.01Ca0.30Fe''0.40Mg1.23Fe'''0.02Ti0.00Al0.11Si1.94O6	53.1267	0.0377391	2.58856	0.781137	0	13.2567	22.5552	7.56712	0.0868084	0	0
2000	1153	0.063563	0.150508	-779.761	0.019462	0.077318	cpx	Na0.01Ca0.30Fe''0.41Mg1.22Fe'''0.02Ti0.00Al0.11Si1.94O6	53.1086	0.0380343	2.58486	0.783596	0	13.3312	22.5046	7.56215	0.0869964	0	0
2000	1152	0.062253	0.147333	-763.238	0.019054	0.075694	cpx	Na0.01Ca0.30Fe''0.41Mg1.22Fe'''0.02Ti0.00Al0.11Si1.94O6	53.0905	0.038328	2.58118	0.786059	0	13.4059	22.4539	7.55694	0.0871816	0	0
2000	1151	0.060981	0.144252	-747.203	0.018659	0.074118	cpx	Na0.01Ca0.30Fe''0.41Mg1.22Fe'''0.02Ti0.00Al0.11Si1.94O6	53.0723	0.0386205	2.57754	0.788526	0	13.4809	22.4033	7.55149	0.0873639	0	0
2000	1150	0.059746	0.141262	-731.639	0.018275	0.072587	cpx	Na0.01Ca0.29Fe''0.41Mg1.22Fe'''0.02Ti0.00Al0.11Si1.94O6	53.0541	0.0389116	2.57392	0.790997	0	13.5561	22.3526	7.54581	0.0875433	0	0
2000	1149	0.058547	0.138358	-716.527	0.017903	0.071102	cpx	Na0.01Ca0.29Fe''0.42Mg1.21Fe'''0.02Ti0.00Al0.11Si1.94O6	53.0359	0.0392013	2.57034	0.793473	0	13.6315	22.302	7.5399	0.08772	0	0
2000	1148	0.057383	0.135539	-701.851	0.017541	0.069659	cpx	Na0.01Ca0.29Fe''0.42Mg1.21Fe'''0.02Ti0.00Al0.11Si1.94O6	53.0176	0.0394897	2.56678	0.795955	0	13.7072	22.2513	7.53376	0.0878938	0	0
2000	1147	0.056251	0.132799	-687.594	0.017189	0.068257	cpx	Na0.01Ca0.29Fe''0.42Mg1.21Fe'''0.02Ti0.00Al0.11Si1.94O6	52.9992	0.0397768	2.56325	0.798441	0	13.7832	22.2007	7.5274	0.0880649	0	0
2000	1146	0.055151	0.130138	-673.742	0.016847	0.066895	cpx	Na0.01Ca0.29Fe''0.42Mg1.21Fe'''0.02Ti0.00Al0.11Si1.94O6	52.9808	0.0400625	2.55974	0.800934	0	13.8594	22.15	7.52081	0.0882333	0	0
2000	1145	0.054082	0.127552	-660.279	0.016515	0.065572	cpx	Na0.01Ca0.29Fe''0.43Mg1.20Fe'''0.02Ti0.00Al0.11Si1.94O6	52.9623	0.0403468	2.55626	0.803432	0	13.9359	22.0993	7.51401	0.0883989	0	0
2000	1144	0.053042	0.125038	-647.192	0.016192	0.064285	cpx	Na0.01Ca0.29Fe''0.43Mg1.20Fe'''0.02Ti0.00Al0.11Si1.94O6	52.9438	0.0406299	2.55281	0.805937	0	14.0127	22.0486	7.50699	0.0885618	0	0
2000	1143	0.052031	0.122593	-634.467	0.015879	0.063034	cpx	Na0.01Ca0.29Fe''0.43Mg1.20Fe'''0.02Ti0.00Al0.11Si1.94O6	52.9252	0.0409115	2.54939	0.808449	0	14.0897	21.9978	7.49975	0.0887221	0	0
2000	1142	0.051048	0.120216	-622.091	0.015573	0.061817	cpx	Na0.01Ca0.29Fe''0.43Mg1.20Fe'''0.02Ti0.00Al0.11Si1.94O6	52.9066	0.0411918	2.54599	0.810968	0	14.1671	21.947	7.49231	0.0888797	0	0
2000	1141	0.050091	0.117904	-610.052	0.015276	0.060633	cpx	Na0.01Ca0.29Fe''0.44Mg1.19Fe'''0.02Ti0.00Al0.11Si1.94O6	52.8879	0.0414707	2.54262	0.813493	0	14.2447	21.8962	7.48465	0.0890346	0	0
2000	1140	0.04916	0.115654	-598.339	0.014987	0.059481	cpx	Na0.01Ca0.29Fe''0.44Mg1.19Fe'''0.02Ti0.00Al0.11Si1.94O6	52.8691	0.0417483	2.53928	0.816027	0	14.3225	21.8453	7.47679	0.0891869	0	0
2000	1139	0.048253	0.113465	-586.94	0.014706	0.05836	cpx	Na0.01Ca0.29Fe''0.44Mg1.19Fe'''0.02Ti0.00Al0.11Si1.94O6	52.8503	0.0420246	2.53596	0.818568	0	14.4007	21.7944	7.46873	0.0893367	0	0
2000	1138	0.047371	0.111334	-575.844	0.014432	0.057269	cpx	Na0.01Ca0.29Fe''0.44Mg1.19Fe'''0.02Ti0.00Al0.11Si1.94O6	52.8314	0.0422994	2.53266	0.821118	0	14.4792	21.7434	7.46046	0.0894838	0	0
2000	1137	0.046512	0.109259	-565.042	0.014165	0.056207	cpx	Na0.01Ca0.29Fe''0.45Mg1.19Fe'''0.02Ti0.00Al0.11Si1.94O6	52.8125	0.042573	2.52939	0.823676	0	14.558	21.6923	7.452	0.0896284	0	0
2000	1136	0.045675	0.107239	-554.523	0.013906	0.055172	cpx	Na0.01Ca0.29Fe''0.45Mg1.18Fe'''0.02Ti0.00Al0.11Si1.94O6	52.7934	0.0428451	2.52615	0.826243	0	14.6371	21.6412	7.44334	0.0897704	0	0
2000	1135	0.044859	0.105272	-544.278	0.013653	0.054165	cpx	Na0.01Ca0.29Fe''0.45Mg1.18Fe'''0.02Ti0.00Al0.11Si1.94O6	52.7743	0.0431159	2.52293	0.828819	0	14.7164	21.59	7.43449	0.0899099	0	0
2000	1134	0.044065	0.103356	-534.299	0.013406	0.053184	cpx	Na0.01Ca0.29Fe''0.45Mg1.18Fe'''0.02Ti0.00Al0.11Si1.94O6	52.7552	0.0433854	2.51974	0.831404	0	14.7961	21.5387	7.42545	0.0900469	0	0
2000	1133	0.043291	0.101489	-524.576	0.013166	0.052227	cpx	Na0.01Ca0.29Fe''0.46Mg1.18Fe'''0.02Ti0.00Al0.11Si1.94O6	52.7359	0.0436535	2.51657	0.834	0	14.8761	21.4873	7.41623	0.0901813	0	0
2000	1132	0.042537	0.09967	-515.1	0.012932	0.051295	cpx	Na0.01Ca0.29Fe''0.46Mg1.17Fe'''0.02Ti0.00Al0.11Si1.94O6	52.7166	0.0439202	2.51343	0.836605	0	14.9565	21.4358	7.40681	0.0903134	0	0
2000	1131	0.041801	0.097897	-505.865	0.012704	0.050387	cpx	Na0.01Ca0.29Fe''0.46Mg1.17Fe'''0.02Ti0.00Al0.11Si1.94O6	52.6972	0.0441856	2.51031	0.839221	0	15.0371	21.3843	7.39722	0.0904429	0	0
2000	1130	0.041084	0.096168	-496.862	0.012482	0.049502	cpx	Na0.01Ca0.29Fe''0.46Mg1.17Fe'''0.02Ti0.00Al0.11Si1.94O6	52.6778	0.0444496	2.50721	0.841847	0	15.1181	21.3326	7.38744	0.09057	0	0
2000	1129	0.040385	0.094483	-488.084	0.012265	0.048639	cpx	Na0.01Ca0.29Fe''0.47Mg1.17Fe'''0.02Ti0.00Al0.11Si1.94O6	52.6582	0.0447123	2.50414	0.844485	0	15.1994	21.2809	7.37749	0.0906947	0	0
2000	1128	0.039702	0.09284	-479.525	0.012054	0.047797	cpx	Na0.01Ca0.29Fe''0.47Mg1.16Fe'''0.02Ti0.00Al0.11Si1.94O6	52.6386	0.0449737	2.50109	0.847134	0	15.281	21.229	7.36736	0.0908169	0	0
2000	1127	0.039037	0.091238	-471.176	0.011848	0.046976	cpx	Na0.01Ca0.29Fe''0.47Mg1.16Fe'''0.02Ti0.00Al0.11Si1.94O6	52.6189	0.0452336	2.49807	0.849794	0	15.363	21.1771	7.35706	0.0909368	0	0
2000	1126	0.038388	0.089675	-463.032	0.011646	0.046175	cpx	Na0.01Ca0.29Fe''0.48Mg1.16Fe'''0.02Ti0.00Al0.11Si1.94O6	52.5991	0.0454923	2.49507	0.852467	0	15.4453	21.125	7.34659	0.0910542	0	0
2000	1125	0.037754	0.08815	-455.087	0.01145	0.045393	cpx	Na0.01Ca0.29Fe''0.48Mg1.16Fe'''0.02Ti0.00Al0.11Si1.94O6	52.5792	0.0457496	2.49209	0.855152	0	15.5279	21.0727	7.33595	0.0911693	0	0
2000	1124	0.037136	0.086662	-447.333	0.011259	0.044631	cpx	Na0.01Ca0.29Fe''0.48Mg1.15Fe'''0.02Ti0.00Al0.11Si1.94O6	52.5593	0.0460055	2.48914	0.85785	0	15.6109	21.0204	7.32515	0.0912821	0	0
2000	1123	0.036533	0.08521	-439.767	0.011072	0.043886	cpx	Na0.01Ca0.29Fe''0.48Mg1.15Fe'''0.02Ti0.00Al0.11Si1.94O6	52.5392	0.0462601	2.48621	0.86056	0	15.6942	20.9679	7.31418	0.0913925	0	0
2000	1122	0.035944	0.083793	-432.381	0.010889	0.04316	cpx	Na0.01Ca0.29Fe''0.49Mg1.15Fe'''0.02Ti0.00Al0.11Si1.94O6	52.5191	0.0465134	2.4833	0.863284	0	15.7779	20.9153	7.30305	0.0915006	0	0
2000	1121	0.035368	0.082409	-425.171	0.010711	0.042451	cpx	Na0.01Ca0.29Fe''0.49Mg1.15Fe'''0.02Ti0.00Al0.11Si1.94O6	52.4989	0.0467653	2.48042	0.866022	0	15.862	20.8626	7.29176	0.0916063	0	0
2000	1120	0.034807	0.081059	-418.131	0.010537	0.041758	cpx	Na0.01Ca0.29Fe''0.49Mg1.14Fe'''0.02Ti0.00Al0.11Si1.94O6	52.4786	0.0470159	2.47756	0.868773	0	15.9464	20.8097	7.28031	0.0917098	0	0
2000	1119	0.034258	0.07974	-411.256	0.010367	0.041082	cpx	Na0.01Ca0.29Fe''0.49Mg1.14Fe'''0.02Ti0.00Al0.11Si1.94O6	52.4582	0.0472651	2.47472	0.871539	0	16.0311	20.7566	7.26871	0.091811	0	0
2000	1118	0.033722	0.078452	-404.542	0.010201	0.040422	cpx	Na0.01Ca0.29Fe''0.50Mg1.14Fe'''0.02Ti0.00Al0.11Si1.94O6	52.4377	0.0475131	2.4719	0.87432	0	16.1163	20.7034	7.25696	0.0919099	0	0
2000	1117	0.033199	0.077194	-397.984	0.010039	0.039777	cpx	Na0.01Ca0.29Fe''0.50Mg1.14Fe'''0.02Ti0.00Al0.11Si1.94O6	52.4171	0.0477597	2.46911	0.877115	0	16.2018	20.6501	7.24505	0.0920066	0	0
2000	1116	0.032687	0.075965	-391.577	0.009881	0.039147	cpx	Na0.01Ca0.29Fe''0.50Mg1.13Fe'''0.02Ti0.00Al0.11Si1.94O6	52.3964	0.0480049	2.46633	0.879926	0	16.2877	20.5966	7.233	0.092101	0	0
2000	1115	0.032187	0.074765	-385.317	0.009726	0.038531	cpx	Na0.01Ca0.29Fe''0.51Mg1.13Fe'''0.02Ti0.00Al0.11Si1.94O6	52.3756	0.0482489	2.46358	0.882752	0	16.3739	20.5429	7.2208	0.0921931	0	0
2000	1114	0.031699	0.073592	-379.2	0.009575	0.03793	cpx	Na0.01Ca0.29Fe''0.51Mg1.13Fe'''0.02Ti0.00Al0.11Si1.94O6	52.3547	0.0484915	2.46086	0.885595	0	16.4606	20.489	7.20846	0.0922831	0	0
2000	1113	0.031221	0.072445	-373.222	0.009427	0.037342	cpx	Na0.01Ca0.29Fe''0.51Mg1.13Fe'''0.02Ti0.00Al0.11Si1.94O6	52.3337	0.0487328	2.45815	0.888453	0	16.5476	20.435	7.19598	0.0923708	0	0
2000	1112	0.030755	0.071325	-367.379	0.009283	0.036767	cpx	Na0.01Ca0.28Fe''0.51Mg1.12Fe'''0.02Ti0.00Al0.11Si1.94O6	52.3126	0.0489728	2.45547	0.891329	0	16.635	20.3808	7.18335	0.0924564	0	0
2000	1111	0.030298	0.07023	-361.667	0.009142	0.036205	cpx	Na0.01Ca0.28Fe''0.52Mg1.12Fe'''0.02Ti0.00Al0.11Si1.94O6	52.2914	0.0492115	2.4528	0.894221	0	16.7228	20.3264	7.17059	0.0925397	0	0
2000	1110	0.029852	0.06916	-356.083	0.009004	0.035656	cpx	Na0.01Ca0.28Fe''0.52Mg1.12Fe'''0.03Ti0.00Al0.11Si1.94O6	52.2701	0.0494489	2.45016	0.897131	0	16.811	20.2718	7.1577	0.0926209	0	0
2000	1109	0.029416	0.068113	-350.623	0.008869	0.035119	cpx	Na0.01Ca0.28Fe''0.52Mg1.12Fe'''0.03Ti0.00Al0.11Si1.94O6	52.2487	0.049685	2.44754	0.900059	0	16.8996	20.217	7.14467	0.0926999	0	0
2000	1108	0.028989	0.06709	-345.284	0.008737	0.034594	cpx	Na0.01Ca0.28Fe''0.53Mg1.11Fe'''0.03Ti0.00Al0.11Si1.94O6	52.2272	0.0499198	2.44494	0.903005	0	16.9886	20.1621	7.1315	0.0927768	0	0
2000	1107	0.028572	0.066089	-340.062	0.008608	0.03408	cpx	Na0.01Ca0.28Fe''0.53Mg1.11Fe'''0.03Ti0.00Al0.11Si1.94O6	52.2056	0.0501533	2.44237	0.905969	0	17.078	20.1069	7.11821	0.0928515	0	0
2000	1106	0.028164	0.06511	-334.954	0.008482	0.033578	cpx	Na0.01Ca0.28Fe''0.53Mg1.11Fe'''0.03Ti0.00Al0.11Si1.94O6	52.1839	0.0503856	2.43981	0.908952	0	17.1678	20.0515	7.10479	0.0929241	0	0
2000	1105	0.027765	0.064153	-329.958	0.008358	0.033087	cpx	Na0.01Ca0.28Fe''0.54Mg1.11Fe'''0.03Ti0.00Al0.11Si1.94O6	52.162	0.0506165	2.43727	0.911954	0	17.258	19.9959	7.09125	0.0929945	0	0
2000	1104	0.027374	0.063217	-325.07	0.008237	0.032606	cpx	Na0.01Ca0.28Fe''0.54Mg1.10Fe'''0.03Ti0.00Al0.11Si1.94O6	52.1401	0.0508462	2.43476	0.914976	0	17.3486	19.9401	7.07758	0.0930629	0	0
2000	1103	0.026991	0.062299	-320.281	0.008119	0.032135	cpx	Na0.01Ca0.28Fe''0.54Mg1.10Fe'''0.03Ti0.00Al0.11Si1.94O6	52.118	0.0510746	2.43226	0.918015	0	17.4396	19.8841	7.06378	0.093129	0	0
2000	1102	0.026608	0.061383	-315.502	0.008001	0.031665	cpx	Na0.01Ca0.28Fe''0.54Mg1.10Fe'''0.03Ti0.00Al0.11Si1.94O6	52.0959	0.0513022	2.42974	0.921032	0	17.5308	19.8281	7.04984	0.0931911	0	0
2000	1101	0.02624	0.0605	-310.892	0.007887	0.031212	cpx	Na0.01Ca0.28Fe''0.55Mg1.10Fe'''0.03Ti0.00Al0.11Si1.94O6	52.0738	0.0515284	2.42724	0.924069	0	17.6224	19.772	7.03579	0.0932511	0	0
2000	1100	0.025879	0.059636	-306.379	0.007775	0.030768	cpx	Na0.01Ca0.28Fe''0.55Mg1.09Fe'''0.03Ti0.00Al0.11Si1.94O6	52.0515	0.0517534	2.42476	0.927126	0	17.7144	19.7156	7.02162	0.0933091	0	0
2000	1099	0.025525	0.05879	-301.962	0.007666	0.030333	cpx	Na0.01Ca0.28Fe''0.55Mg1.09Fe'''0.03Ti0.00Al0.11Si1.94O6	52.0291	0.051977	2.4223	0.930203	0	17.8068	19.6589	7.00733	0.093365	0	0
2000	1098	0.025179	0.057962	-297.638	0.007559	0.029908	cpx	Na0.01Ca0.28Fe''0.56Mg1.09Fe'''0.03Ti0.00Al0.11Si1.94O6	52.0066	0.0521994	2.41986	0.933301	0	17.8996	19.6021	6.99294	0.0934188	0	0
2000	1097	0.024841	0.057151	-293.404	0.007454	0.029492	cpx	Na0.01Ca0.28Fe''0.56Mg1.08Fe'''0.03Ti0.00Al0.11Si1.94O6	51.984	0.0524205	2.41744	0.936421	0	17.9929	19.545	6.97843	0.0934706	0	0
2000	1096	0.024509	0.056357	-289.259	0.007352	0.029084	cpx	Na0.01Ca0.28Fe''0.56Mg1.08Fe'''0.03Ti0.00Al0.11Si1.94O6	51.9612	0.0526404	2.41503	0.939563	0	18.0866	19.4876	6.96382	0.0935204	0	0
2000	1095	0.024184	0.05558	-285.201	0.007252	0.028685	cpx	Na0.01Ca0.28Fe''0.57Mg1.08Fe'''0.03Ti0.00Al0.11Si1.94O6	51.9383	0.052859	2.41265	0.942727	0	18.1807	19.43	6.9491	0.0935681	0	0
2000	1094	0.023866	0.05482	-281.226	0.007153	0.028294	cpx	Na0.01Ca0.28Fe''0.57Mg1.08Fe'''0.03Ti0.00Al0.11Si1.94O6	51.9154	0.0530764	2.41029	0.945914	0	18.2753	19.3722	6.93428	0.0936139	0	0
2000	1093	0.023554	0.054075	-277.333	0.007057	0.027911	cpx	Na0.01Ca0.28Fe''0.57Mg1.07Fe'''0.03Ti0.00Al0.11Si1.94O6	51.8922	0.0532925	2.40794	0.949123	0	18.3703	19.3141	6.91935	0.0936576	0	0
2000	1092	0.023249	0.053345	-273.52	0.006963	0.027536	cpx	Na0.01Ca0.28Fe''0.58Mg1.07Fe'''0.03Ti0.00Al0.11Si1.94O6	51.869	0.0535074	2.40562	0.952356	0	18.4657	19.2558	6.90433	0.0936994	0	0
2000	1091	0.02295	0.05263	-269.785	0.006871	0.027169	cpx	Na0.01Ca0.28Fe''0.58Mg1.07Fe'''0.03Ti0.00Al0.11Si1.94O6	51.8456	0.0537211	2.40331	0.955613	0	18.5616	19.1972	6.8892	0.0937391	0	0
2000	1090	0.022658	0.05193	-266.126	0.00678	0.026809	cpx	Na0.01Ca0.28Fe''0.58Mg1.07Fe'''0.03Ti0.00Al0.11Si1.94O6	51.8221	0.0539336	2.40102	0.958894	0	18.658	19.1383	6.87398	0.0937769	0	0
2000	1089	0.022371	0.051244	-262.54	0.006692	0.026457	cpx	Na0.01Ca0.27Fe''0.59Mg1.06Fe'''0.03Ti0.00Al0.11Si1.94O6	51.7985	0.0541449	2.39875	0.9622	0	18.7548	19.0792	6.85867	0.0938128	0	0
2000	1088	0.02209	0.050573	-259.028	0.006605	0.026112	cpx	Na0.01Ca0.27Fe''0.59Mg1.06Fe'''0.03Ti0.00Al0.11Si1.94O6	51.7747	0.0543549	2.3965	0.965531	0	18.852	19.0198	6.84326	0.0938466	0	0
2000	1087	0.021814	0.049914	-255.585	0.00652	0.025773	cpx	Na0.01Ca0.27Fe''0.59Mg1.06Fe'''0.03Ti0.00Al0.11Si1.94O6	51.7508	0.0545638	2.39427	0.968887	0	18.9497	18.9601	6.82775	0.0938785	0	0
2000	1086	0.021544	0.049269	-252.212	0.006436	0.025442	cpx	Na0.01Ca0.27Fe''0.60Mg1.05Fe'''0.03Ti0.00Al0.11Si1.94O6	51.7268	0.0547715	2.39205	0.972268	0	19.0479	18.9001	6.81216	0.0939085	0	0
2000	1085	0.02128	0.048637	-248.906	0.006355	0.025117	cpx	Na0.01Ca0.27Fe''0.60Mg1.05Fe'''0.03Ti0.00Al0.11Si1.94O6	51.7026	0.054978	2.38986	0.975676	0	19.1466	18.8399	6.79649	0.0939365	0	0
2000	1084	0.021021	0.048018	-245.665	0.006274	0.024798	cpx	Na0.01Ca0.27Fe''0.60Mg1.05Fe'''0.03Ti0.00Al0.11Si1.94O6	51.6783	0.0551833	2.38768	0.979111	0	19.2457	18.7794	6.78072	0.0939626	0	0
2000	1083	0.020766	0.047411	-242.489	0.006196	0.024486	cpx	Na0.01Ca0.27Fe''0.61Mg1.05Fe'''0.03Ti0.00Al0.11Si1.94O6	51.6539	0.0553874	2.38551	0.982572	0	19.3452	18.7185	6.76487	0.0939868	0	0
2000	1082	0.020517	0.046816	-239.375	0.006119	0.02418	cpx	Na0.01Ca0.27Fe''0.61Mg1.04Fe'''0.03Ti0.00Al0.11Si1.94O6	51.6293	0.0555904	2.38337	0.986061	0	19.4453	18.6574	6.74894	0.094009	0	0
2000	1081	0.020273	0.046233	-236.322	0.006044	0.02388	cpx	Na0.01Ca0.27Fe''0.61Mg1.04Fe'''0.03Ti0.00Al0.11Si1.94O6	51.6046	0.0557923	2.38124	0.989578	0	19.5458	18.596	6.73292	0.0940293	0	0
2000	1080	0.020034	0.045661	-233.328	0.00597	0.023586	cpx	Na0.01Ca0.27Fe''0.62Mg1.04Fe'''0.03Ti0.00Al0.11Si1.94O6	51.5797	0.055993	2.37913	0.993123	0	19.6468	18.5343	6.71683	0.0940478	0	0
2000	1079	0.019799	0.045101	-230.393	0.005897	0.023298	cpx	Na0.01Ca0.27Fe''0.62Mg1.03Fe'''0.03Ti0.00Al0.11Si1.94O6	51.5548	0.0561926	2.37704	0.996697	0	19.7483	18.4723	6.70066	0.0940643	0	0
2000	1078	0.019569	0.044551	-227.515	0.005826	0.023015	cpx	Na0.01Ca0.27Fe''0.62Mg1.03Fe'''0.03Ti0.00Al0.11Si1.94O6	51.5296	0.056391	2.37496	1.0003	0	19.8503	18.41	6.68441	0.094079	0	0
2000	1077	0.019343	0.044012	-224.692	0.005756	0.022738	cpx	Na0.01Ca0.27Fe''0.63Mg1.03Fe'''0.03Ti0.00Al0.11Si1.94O6	51.5043	0.0565884	2.3729	1.00393	0	19.9527	18.3473	6.66809	0.0940917	0	0
2000	1076	0.019122	0.043484	-221.923	0.005688	0.022466	cpx	Na0.01Ca0.27Fe''0.63Mg1.02Fe'''0.03Ti0.00Al0.11Si1.94O6	51.4789	0.0567846	2.37085	1.00759	0	20.0557	18.2844	6.6517	0.0941026	0	0
2000	1075	0.018905	0.042966	-219.208	0.005621	0.022199	cpx	Na0.01Ca0.27Fe''0.63Mg1.02Fe'''0.03Ti0.00Al0.10Si1.94O6	51.4533	0.0569798	2.36883	1.01129	0	20.1591	18.2211	6.63523	0.0941117	0	0
2000	1074	0.018692	0.042457	-216.544	0.005555	0.021938	cpx	Na0.01Ca0.27Fe''0.64Mg1.02Fe'''0.03Ti0.00Al0.10Si1.93O6	51.4276	0.0571738	2.36681	1.01501	0	20.263	18.1575	6.6187	0.0941188	0	0
2000	1073	0.018483	0.041959	-213.931	0.005491	0.021681	cpx	Na0.01Ca0.27Fe''0.64Mg1.02Fe'''0.03Ti0.00Al0.10Si1.93O6	51.4018	0.0573668	2.36482	1.01876	0	20.3675	18.0936	6.6021	0.0941241	0	0
2000	1072	0.018278	0.04147	-211.367	0.005427	0.02143	cpx	Na0.01Ca0.27Fe''0.64Mg1.01Fe'''0.03Ti0.00Al0.10Si1.93O6	51.3758	0.0575587	2.36283	1.02255	0	20.4724	18.0294	6.58543	0.0941276	0	0
2000	1071	0.018077	0.040991	-208.852	0.005365	0.021183	cpx	Na0.01Ca0.27Fe''0.65Mg1.01Fe'''0.03Ti0.00Al0.10Si1.93O6	51.3496	0.0577495	2.36087	1.02637	0	20.5778	17.9648	6.5687	0.0941292	0	0
2000	1070	0.01788	0.04052	-206.384	0.005304	0.02094	cpx	Na0.01Ca0.26Fe''0.65Mg1.01Fe'''0.03Ti0.00Al0.10Si1.93O6	51.3233	0.0579393	2.35891	1.03022	0	20.6837	17.8999	6.5519	0.0941289	0	0
2000	1069	0.017687	0.040059	-203.962	0.005245	0.020703	cpx	Na0.01Ca0.26Fe''0.66Mg1.00Fe'''0.03Ti0.00Al0.10Si1.93O6	51.2968	0.058128	2.35697	1.0341	0	20.7901	17.8346	6.53505	0.0941269	0	0
2000	1068	0.017497	0.039606	-201.585	0.005186	0.02047	cpx	Na0.01Ca0.26Fe''0.66Mg1.00Fe'''0.03Ti0.00Al0.10Si1.93O6	51.2702	0.0583158	2.35505	1.03802	0	20.8971	17.7691	6.51814	0.094123	0	0
2000	1067	0.017311	0.039162	-199.252	0.005128	0.020241	cpx	Na0.01Ca0.26Fe''0.66Mg1.00Fe'''0.03Ti0.00Al0.10Si1.93O6	51.2434	0.0585024	2.35314	1.04197	0	21.0045	17.7031	6.50116	0.0941172	0	0
2000	1066	0.017128	0.038726	-196.963	0.005072	0.020016	cpx	Na0.01Ca0.26Fe''0.67Mg0.99Fe'''0.03Ti0.00Al0.10Si1.93O6	51.2165	0.0586881	2.35125	1.04596	0	21.1125	17.6369	6.48414	0.0941097	0	0
2000	1065	0.016949	0.038298	-194.715	0.005017	0.019796	cpx	Na0.01Ca0.26Fe''0.67Mg0.99Fe'''0.03Ti0.00Al0.10Si1.93O6	51.1894	0.0588728	2.34936	1.04998	0	21.221	17.5702	6.46706	0.0941003	0	0
2000	1064	0.016773	0.037878	-192.509	0.004962	0.01958	cpx	Na0.01Ca0.26Fe''0.67Mg0.99Fe'''0.03Ti0.00Al0.10Si1.93O6	51.1622	0.0590565	2.34749	1.05403	0	21.3299	17.5033	6.44992	0.0940892	0	0
2000	1063	0.016601	0.037466	-190.343	0.004909	0.019367	cpx	Na0.01Ca0.26Fe''0.68Mg0.98Fe'''0.03Ti0.00Al0.10Si1.93O6	51.1348	0.0592392	2.34564	1.05813	0	21.4394	17.4359	6.43274	0.0940762	0	0
2000	1062	0.016431	0.037061	-188.217	0.004856	0.019159	cpx	Na0.01Ca0.26Fe''0.68Mg0.98Fe'''0.03Ti0.00Al0.10Si1.93O6	51.1072	0.0594209	2.34379	1.06225	0	21.5495	17.3682	6.41551	0.0940615	0	0
2000	1061	0.016265	0.036664	-186.129	0.004805	0.018954	cpx	Na0.01Ca0.26Fe''0.69Mg0.98Fe'''0.03Ti0.00Al0.10Si1.93O6	51.0795	0.0596017	2.34196	1.06642	0	21.66	17.3002	6.39823	0.0940449	0	0
2000	1060	0.016102	0.036275	-184.079	0.004754	0.018753	cpx	Na0.01Ca0.26Fe''0.69Mg0.97Fe'''0.03Ti0.00Al0.10Si1.93O6	51.0517	0.0597815	2.34014	1.07062	0	21.7711	17.2318	6.38091	0.0940266	0	0
2000	1059	0.015941	0.035892	-182.066	0.004705	0.018556	cpx	Na0.01Ca0.26Fe''0.69Mg0.97Fe'''0.03Ti0.00Al0.10Si1.93O6	51.0236	0.0599604	2.33834	1.07485	0	21.8827	17.163	6.36354	0.0940065	0	0
2000	1058	0.015784	0.035516	-180.088	0.004656	0.018362	cpx	Na0.01Ca0.26Fe''0.70Mg0.97Fe'''0.03Ti0.00Al0.10Si1.93O6	50.9954	0.0601384	2.33654	1.07913	0	21.9948	17.0939	6.34613	0.0939846	0	0
2000	1057	0.015629	0.035148	-178.146	0.004608	0.018172	cpx	Na0.01Ca0.26Fe''0.70Mg0.96Fe'''0.03Ti0.00Al0.10Si1.93O6	50.9671	0.0603154	2.33475	1.08344	0	22.1074	17.0243	6.32868	0.093961	0	0
2000	1056	0.015478	0.034785	-176.239	0.004561	0.017985	cpx	Na0.01Ca0.26Fe''0.71Mg0.96Fe'''0.03Ti0.00Al0.10Si1.93O6	50.9386	0.0604915	2.33298	1.0878	0	22.2206	16.9544	6.31119	0.0939356	0	0
2000	1055	0.015329	0.03443	-174.365	0.004515	0.017802	cpx	Na0.01Ca0.26Fe''0.71Mg0.96Fe'''0.03Ti0.00Al0.10Si1.93O6	50.9099	0.0606667	2.33122	1.09219	0	22.3343	16.8842	6.29367	0.0939084	0	0
2000	1054	0.015183	0.03408	-172.524	0.00447	0.017622	cpx	Na0.01Ca0.26Fe''0.71Mg0.95Fe'''0.03Ti0.00Al0.10Si1.93O6	50.881	0.0608411	2.32946	1.09662	0	22.4485	16.8135	6.27611	0.0938795	0	0
2000	1053	0.015039	0.033737	-170.715	0.004426	0.017445	cpx	Na0.01Ca0.25Fe''0.72Mg0.95Fe'''0.03Ti0.00Al0.10Si1.93O6	50.852	0.0610145	2.32772	1.10109	0	22.5633	16.7425	6.25852	0.0938488	0	0
2000	1052	0.014898	0.0334	-168.938	0.004382	0.017271	cpx	Na0.01Ca0.25Fe''0.72Mg0.95Fe'''0.03Ti0.00Al0.10Si1.93O6	50.8228	0.0611871	2.32598	1.10561	0	22.6786	16.6711	6.24089	0.0938164	0	0
2000	1051	0.014759	0.033069	-167.192	0.004339	0.0171	cpx	Na0.01Ca0.25Fe''0.73Mg0.94Fe'''0.03Ti0.00Al0.10Si1.93O6	50.7935	0.0613588	2.32426	1.11016	0	22.7944	16.5993	6.22324	0.0937823	0	0
2000	1050	0.014623	0.032744	-165.476	0.004297	0.016933	cpx	Na0.01Ca0.25Fe''0.73Mg0.94Fe'''0.03Ti0.00Al0.10Si1.93O6	50.764	0.0615297	2.32254	1.11475	0	22.9108	16.5271	6.20556	0.0937464	0	0
2000	1049	0.014489	0.032425	-163.789	0.004255	0.016768	cpx	Na0.01Ca0.25Fe''0.73Mg0.93Fe'''0.03Ti0.00Al0.10Si1.93O6	50.7343	0.0616998	2.32083	1.11939	0	23.0277	16.4545	6.18786	0.0937088	0	0
2000	1048	0.014358	0.032111	-162.131	0.004215	0.016606	cpx	Na0.01Ca0.25Fe''0.74Mg0.93Fe'''0.03Ti0.00Al0.10Si1.93O6	50.7045	0.061869	2.31913	1.12407	0	23.1451	16.3815	6.17013	0.0936695	0	0
2000	1047	0.014229	0.031802	-160.502	0.004175	0.016446	cpx	Na0.01Ca0.25Fe''0.74Mg0.93Fe'''0.03Ti0.00Al0.10Si1.93O6	50.6744	0.0620374	2.31743	1.12879	0	23.2631	16.3082	6.15237	0.0936284	0	0
2000	1046	0.014102	0.031499	-158.9	0.004135	0.01629	cpx	Na0.01Ca0.25Fe''0.75Mg0.92Fe'''0.03Ti0.00Al0.10Si1.93O6	50.6443	0.062205	2.31574	1.13355	0	23.3816	16.2344	6.1346	0.0935857	0	0
2000	1045	0.013978	0.031201	-157.324	0.004097	0.016136	cpx	Na0.01Ca0.25Fe''0.75Mg0.92Fe'''0.03Ti0.00Al0.10Si1.93O6	50.6139	0.0623718	2.31406	1.13836	0	23.5007	16.1603	6.11681	0.0935412	0	0
2000	1044	0.013855	0.030908	-155.775	0.004059	0.015985	cpx	Na0.01Ca0.25Fe''0.75Mg0.92Fe'''0.03Ti0.00Al0.10Si1.93O6	50.5834	0.0625379	2.31239	1.14321	0	23.6203	16.0857	6.099	0.0934951	0	0
2000	1043	0.013735	0.03062	-154.252	0.004021	0.015836	cpx	Na0.01Ca0.25Fe''0.76Mg0.91Fe'''0.03Ti0.00Al0.10Si1.93O6	50.5527	0.0627031	2.31071	1.14811	0	23.7404	16.0108	6.08118	0.0934472	0	0
2000	1042	0.013616	0.030337	-152.754	0.003985	0.01569	cpx	Na0.01Ca0.25Fe''0.76Mg0.91Fe'''0.03Ti0.00Al0.10Si1.93O6	50.5219	0.0628676	2.30905	1.15305	0	23.861	15.9354	6.06335	0.0933977	0	0
2000	1041	0.0135	0.030059	-151.28	0.003949	0.015546	cpx	Na0.01Ca0.25Fe''0.77Mg0.91Fe'''0.03Ti0.00Al0.10Si1.93O6	50.4908	0.0630313	2.30739	1.15803	0	23.9822	15.8597	6.0455	0.0933465	0	0
2000	1040	0.013386	0.029785	-149.831	0.003913	0.015405	cpx	Na0.01Ca0.25Fe''0.77Mg0.90Fe'''0.03Ti0.00Al0.10Si1.93O6	50.4596	0.0631943	2.30573	1.16306	0	24.1039	15.7835	6.02765	0.0932936	0	0
2000	1039	0.013273	0.029516	-148.404	0.003878	0.015266	cpx	Na0.01Ca0.25Fe''0.78Mg0.90Fe'''0.03Ti0.00Al0.10Si1.93O6	50.4283	0.0633565	2.30407	1.16814	0	24.2262	15.7069	6.00979	0.093239	0	0
2000	1038	0.013163	0.029252	-147.001	0.003844	0.015129	cpx	Na0.01Ca0.25Fe''0.78Mg0.89Fe'''0.03Ti0.00Al0.10Si1.93O6	50.3967	0.063518	2.30242	1.17326	0	24.349	15.63	5.99192	0.0931828	0	0
2000	1037	0.013054	0.028991	-145.62	0.00381	0.014994	cpx	Na0.01Ca0.25Fe''0.79Mg0.89Fe'''0.03Ti0.00Al0.10Si1.93O6	50.365	0.0636788	2.30077	1.17843	0	24.4723	15.5526	5.97405	0.0931249	0	0
2000	1036	0.012947	0.028735	-144.26	0.003777	0.014862	cpx	Na0.01Ca0.25Fe''0.79Mg0.89Fe'''0.03Ti0.00Al0.10Si1.93O6	50.3332	0.0638389	2.29912	1.18364	0	24.5961	15.4748	5.95618	0.0930654	0	0
2000	1035	0.012842	0.028483	-142.922	0.003744	0.014732	cpx	Na0.01Ca0.24Fe''0.79Mg0.88Fe'''0.03Ti0.00Al0.10Si1.93O6	50.3011	0.0639982	2.29748	1.1889	0	24.7205	15.3966	5.93831	0.0930042	0	0
2000	1034	0.012738	0.028235	-141.605	0.003712	0.014604	cpx	Na0.01Ca0.24Fe''0.80Mg0.88Fe'''0.03Ti0.00Al0.10Si1.93O6	50.2689	0.0641569	2.29583	1.19421	0	24.8454	15.3181	5.92044	0.0929414	0	0
2000	1033	0.012636	0.027991	-140.308	0.00368	0.014477	cpx	Na0.01Ca0.24Fe''0.80Mg0.87Fe'''0.03Ti0.00Al0.10Si1.93O6	50.2366	0.0643149	2.29418	1.19957	0	24.9709	15.2391	5.90258	0.0928769	0	0
2000	1032	0.012536	0.02775	-139.03	0.003649	0.014353	cpx	Na0.01Ca0.24Fe''0.81Mg0.87Fe'''0.03Ti0.00Al0.10Si1.93O6	50.204	0.0644721	2.29254	1.20497	0	25.0968	15.1597	5.88472	0.0928108	0	0
2000	1031	0.012437	0.027514	-137.772	0.003618	0.014231	cpx	Na0.01Ca0.24Fe''0.81Mg0.87Fe'''0.04Ti0.00Al0.10Si1.93O6	50.1713	0.0646287	2.29089	1.21043	0	25.2233	15.0799	5.86688	0.0927431	0	0
2000	1030	0.01234	0.027281	-136.532	0.003588	0.01411	cpx	Na0.01Ca0.24Fe''0.82Mg0.86Fe'''0.04Ti0.00Al0.10Si1.93O6	50.1384	0.0647846	2.28924	1.21593	0	25.3503	14.9996	5.84904	0.0926738	0	0
2000	1029	0.012244	0.027051	-135.31	0.003558	0.013991	cpx	Na0.01Ca0.24Fe''0.82Mg0.86Fe'''0.04Ti0.00Al0.10Si1.93O6	50.1054	0.0649399	2.28758	1.22147	0	25.4778	14.919	5.83122	0.0926028	0	0
2000	1028	0.01215	0.026825	-134.106	0.003529	0.013874	cpx	Na0.01Ca0.24Fe''0.83Mg0.85Fe'''0.04Ti0.00Al0.10Si1.93O6	50.0722	0.0650944	2.28593	1.22707	0	25.6058	14.838	5.81341	0.0925303	0	0
2000	1027	0.012057	0.026602	-132.92	0.0035	0.013759	cpx	Na0.01Ca0.24Fe''0.83Mg0.85Fe'''0.04Ti0.00Al0.10Si1.93O6	50.0388	0.0652483	2.28426	1.23272	0	25.7343	14.7566	5.79562	0.0924562	0	0
2000	1026	0.011966	0.026382	-131.75	0.003471	0.013645	cpx	Na0.01Ca0.24Fe''0.84Mg0.85Fe'''0.04Ti0.00Al0.10Si1.93O6	50.0053	0.0654016	2.2826	1.23841	0	25.8633	14.6747	5.77785	0.0923804	0	0
2000	1025	0.011876	0.026166	-130.596	0.003443	0.013533	cpx	Na0.01Ca0.24Fe''0.84Mg0.84Fe'''0.04Ti0.00Al0.10Si1.93O6	49.9716	0.0655541	2.28093	1.24416	0	25.9929	14.5925	5.76009	0.0923031	0	0
2000	1024	0.011787	0.025952	-129.458	0.003416	0.013423	cpx	Na0.01Ca0.24Fe''0.84Mg0.84Fe'''0.04Ti0.00Al0.10Si1.93O6	49.9377	0.065706	2.27925	1.24995	0	26.1229	14.5099	5.74237	0.0922242	0	0
2000	1023	0.011699	0.025742	-128.338	0.003388	0.013314	cpx	Na0.01Ca0.24Fe''0.85Mg0.83Fe'''0.04Ti0.00Al0.10Si1.93O6	49.9037	0.0658573	2.27756	1.25579	0	26.2534	14.4269	5.72466	0.0921438	0	0
2000	1022	0.011613	0.025536	-127.237	0.003361	0.013207	cpx	Na0.01Ca0.24Fe''0.85Mg0.83Fe'''0.04Ti0.00Al0.10Si1.93O6	49.8695	0.0660079	2.27587	1.26168	0	26.3844	14.3434	5.70699	0.0920618	0	0
2000	1021	0.011529	0.025333	-126.151	0.003335	0.013102	cpx	Na0.01Ca0.24Fe''0.86Mg0.82Fe'''0.04Ti0.00Al0.10Si1.93O6	49.8352	0.0661577	2.27417	1.26763	0	26.5159	14.2596	5.68934	0.0919782	0	0
2000	1020	0.011445	0.025132	-125.078	0.003309	0.012998	cpx	Na0.01Ca0.24Fe''0.86Mg0.82Fe'''0.04Ti0.00Al0.10Si1.93O6	49.8007	0.066307	2.27245	1.27362	0	26.6478	14.1754	5.67173	0.091893	0	0
2000	1019	0.011363	0.024934	-124.019	0.003283	0.012895	cpx	Na0.01Ca0.24Fe''0.87Mg0.82Fe'''0.04Ti0.00Al0.10Si1.93O6	49.7661	0.0664555	2.27073	1.27966	0	26.7803	14.0908	5.65415	0.0918063	0	0
2000	1018	0.011281	0.024738	-122.972	0.003258	0.012794	cpx	Na0.01Ca0.23Fe''0.87Mg0.81Fe'''0.04Ti0.00Al0.10Si1.93O6	49.7313	0.0666033	2.26899	1.28574	0	26.9132	14.0059	5.6366	0.0917181	0	0
2000	1017	0.011201	0.024544	-121.938	0.003233	0.012694	cpx	Na0.01Ca0.23Fe''0.88Mg0.81Fe'''0.04Ti0.00Al0.10Si1.93O6	49.6964	0.0667505	2.26725	1.29188	0	27.0465	13.9205	5.6191	0.0916283	0	0
2000	1016	0.011121	0.024353	-120.916	0.003208	0.012595	cpx	Na0.01Ca0.23Fe''0.88Mg0.80Fe'''0.04Ti0.00Al0.10Si1.93O6	49.6613	0.0668969	2.26549	1.29807	0	27.1804	13.8347	5.60163	0.0915371	0	0
2000	1015	0.011042	0.024164	-119.905	0.003183	0.012497	cpx	Na0.01Ca0.23Fe''0.89Mg0.80Fe'''0.04Ti0.00Al0.10Si1.93O6	49.626	0.0670426	2.26371	1.3043	0	27.3146	13.7486	5.58421	0.0914442	0	0
2000	1014	0.010965	0.023977	-118.906	0.003159	0.0124	cpx	Na0.01Ca0.23Fe''0.89Mg0.79Fe'''0.04Ti0.00Al0.10Si1.93O6	49.5907	0.0671876	2.26192	1.31059	0	27.4493	13.6621	5.56683	0.0913499	0	0
2000	1013	0.010888	0.023792	-117.917	0.003135	0.012304	cpx	Na0.01Ca0.23Fe''0.90Mg0.79Fe'''0.04Ti0.00Al0.10Si1.93O6	49.5551	0.0673318	2.26012	1.31692	0	27.5845	13.5753	5.5495	0.0912541	0	0
2000	1012	0.010812	0.023609	-116.938	0.003111	0.012209	cpx	Na0.01Ca0.23Fe''0.90Mg0.78Fe'''0.04Ti0.00Al0.10Si1.93O6	49.5195	0.0674753	2.2583	1.3233	0	27.72	13.4881	5.53222	0.0911568	0	0
2000	1011	0.010736	0.023428	-115.968	0.003088	0.012115	cpx	Na0.01Ca0.23Fe''0.91Mg0.78Fe'''0.04Ti0.00Al0.10Si1.93O6	49.4837	0.067618	2.25646	1.32973	0	27.856	13.4005	5.51499	0.091058	0	0
2000	1010	0.010662	0.023249	-115.009	0.003064	0.012022	cpx	Na0.01Ca0.23Fe''0.91Mg0.77Fe'''0.04Ti0.00Al0.10Si1.93O6	49.4477	0.0677599	2.2546	1.3362	0	27.9924	13.3126	5.49781	0.0909578	0	0
2000	1009	0.010588	0.023071	-114.057	0.003041	0.01193	cpx	Na0.01Ca0.23Fe''0.92Mg0.77Fe'''0.04Ti0.00Al0.10Si1.93O6	49.4117	0.067901	2.25272	1.34272	0	28.1291	13.2243	5.48069	0.0908561	0	0
2000	1008	0.010514	0.022895	-113.115	0.003018	0.011839	cpx	Na0.01Ca0.23Fe''0.92Mg0.77Fe'''0.04Ti0.00Al0.10Si1.93O6	49.3755	0.0680413	2.25082	1.34929	0	28.2663	13.1357	5.46363	0.0907529	0	0
2000	1007	0.010441	0.02272	-112.18	0.002996	0.011748	cpx	Na0.01Ca0.23Fe''0.93Mg0.76Fe'''0.04Ti0.00Al0.10Si1.93O6	49.3392	0.0681807	2.2489	1.3559	0	28.4038	13.0467	5.44662	0.0906483	0	0
2000	1006	0.010369	0.022547	-111.253	0.002973	0.011659	cpx	Na0.01Ca0.23Fe''0.93Mg0.76Fe'''0.04Ti0.00Al0.10Si1.93O6	49.3028	0.0683192	2.24696	1.36256	0	28.5418	12.9574	5.42968	0.0905423	0	0
2000	1005	0.010298	0.022375	-110.334	0.002951	0.011569	cpx	Na0.01Ca0.23Fe''0.94Mg0.75Fe'''0.04Ti0.00Al0.10Si1.93O6	49.2662	0.0684568	2.24499	1.36926	0	28.68	12.8678	5.4128	0.0904348	0	0
2000	1004	0.010226	0.022204	-109.421	0.002929	0.011481	cpx	Na0.01Ca0.23Fe''0.94Mg0.75Fe'''0.04Ti0.00Al0.10Si1.93O6	49.2295	0.0685934	2.243	1.37601	0	28.8187	12.7779	5.39599	0.090326	0	0
2000	1003	0.010156	0.022034	-108.514	0.002907	0.011393	cpx	Na0.01Ca0.23Fe''0.95Mg0.74Fe'''0.04Ti0.00Al0.10Si1.93O6	49.1927	0.0687291	2.24098	1.3828	0	28.9576	12.6876	5.37925	0.0902157	0	0
2000	1002	0.010085	0.021866	-107.614	0.002885	0.011306	cpx	Na0.01Ca0.23Fe''0.95Mg0.74Fe'''0.04Ti0.00Al0.10Si1.93O6	49.1559	0.0688637	2.23894	1.38963	0	29.0969	12.5971	5.36258	0.090104	0	0
2000	1001	0.010015	0.021698	-106.719	0.002863	0.011219	cpx	Na0.01Ca0.22Fe''0.96Mg0.73Fe'''0.04Ti0.00Al0.10Si1.93O6	49.1189	0.0689973	2.23687	1.39651	0	29.2365	12.5063	5.34598	0.089991	0	0
2000	1000	0.009946	0.021532	-105.83	0.002841	0.011132	cpx	Na0.01Ca0.22Fe''0.97Mg0.73Fe'''0.04Ti0.00Al0.10Si1.93O6	49.0818	0.0691298	2.23477	1.40342	0	29.3764	12.4151	5.32946	0.0898766	0	0
2000	999	0.009876	0.021366	-104.945	0.00282	0.011047	cpx	Na0.01Ca0.22Fe''0.97Mg0.72Fe'''0.04Ti0.00Al0.10Si1.93O6	49.0446	0.0692611	2.23264	1.41038	0	29.5166	12.3237	5.31301	0.0897609	0	0
2000	998	0.009807	0.021201	-104.065	0.002798	0.010961	cpx	Na0.01Ca0.22Fe''0.98Mg0.72Fe'''0.04Ti0.00Al0.10Si1.93O6	49.0073	0.0693913	2.23048	1.41737	0	29.6571	12.2321	5.29664	0.0896438	0	0
2000	997	0.009739	0.021037	-103.19	0.002777	0.010876	cpx	Na0.01Ca0.22Fe''0.98Mg0.71Fe'''0.04Ti0.00Al0.10Si1.93O6	48.9699	0.0695202	2.22829	1.4244	0	29.7978	12.1401	5.28036	0.0895254	0	0
2000	996	0.00967	0.020873	-102.318	0.002756	0.010791	cpx	Na0.01Ca0.22Fe''0.99Mg0.71Fe'''0.04Ti0.00Al0.10Si1.93O6	48.9325	0.0696479	2.22607	1.43147	0	29.9388	12.0479	5.26416	0.0894056	0	0
2000	995	0.009602	0.02071	-101.45	0.002734	0.010706	cpx	Na0.01Ca0.22Fe''0.99Mg0.70Fe'''0.04Ti0.00Al0.10Si1.93O6	48.895	0.0697743	2.22381	1.43858	0	30.08	11.9555	5.24804	0.0892846	0	0
2000	994	0.009533	0.020547	-100.585	0.002713	0.010622	cpx	Na0.01Ca0.22Fe''1.00Mg0.70Fe'''0.04Ti0.00Al0.10Si1.93O6	48.8574	0.0698992	2.22151	1.44572	0	30.2215	11.8628	5.23201	0.0891623	0	0
2000	993	0.009465	0.020385	-99.7232	0.002692	0.010538	cpx	Na0.01Ca0.22Fe''1.00Mg0.69Fe'''0.04Ti0.00Al0.10Si1.93O6	48.8197	0.0700228	2.21918	1.45289	0	30.3631	11.7699	5.21607	0.0890387	0	0
2000	992	0.009397	0.020224	-98.864	0.002671	0.010454	cpx	Na0.01Ca0.22Fe''1.01Mg0.69Fe'''0.04Ti0.00Al0.10Si1.93O6	48.782	0.0701448	2.21682	1.46009	0	30.505	11.6768	5.20023	0.0889139	0	0
2000	991	0.009329	0.020062	-98.0073	0.00265	0.010371	cpx	Na0.01Ca0.22Fe''1.01Mg0.68Fe'''0.04Ti0.00Al0.10Si1.93O6	48.7442	0.0702653	2.21442	1.46732	0	30.647	11.5835	5.18447	0.0887878	0	0
2000	990	0.009261	0.019901	-97.1526	0.002629	0.010287	cpx	Na0.01Ca0.22Fe''1.02Mg0.68Fe'''0.04Ti0.00Al0.10Si1.93O6	48.7064	0.0703842	2.21197	1.47459	0	30.7892	11.49	5.16881	0.0886604	0	0
2000	989	0.009193	0.01974	-96.2999	0.002608	0.010204	cpx	Na0.01Ca0.22Fe''1.02Mg0.67Fe'''0.04Ti0.00Al0.10Si1.93O6	48.6685	0.0705014	2.20949	1.48188	0	30.9316	11.3963	5.15325	0.0885319	0	0
2000	988	0.009125	0.019579	-95.4488	0.002587	0.01012	cpx	Na0.01Ca0.22Fe''1.03Mg0.67Fe'''0.04Ti0.00Al0.10Si1.93O6	48.6305	0.0706168	2.20697	1.48919	0	31.0741	11.3024	5.13779	0.0884021	0	0
2000	987	0.009057	0.019418	-94.599	0.002566	0.010037	cpx	Na0.01Ca0.22Fe''1.04Mg0.66Fe'''0.04Ti0.00Al0.10Si1.93O6	48.5926	0.0707305	2.2044	1.49653	0	31.2167	11.2084	5.12243	0.0882712	0	0
2000	986	0.008989	0.019257	-93.7503	0.002545	0.009954	cpx	Na0.01Ca0.22Fe''1.04Mg0.66Fe'''0.04Ti0.00Al0.10Si1.93O6	48.5546	0.0708423	2.20179	1.5039	0	31.3594	11.1142	5.10717	0.0881391	0	0
2000	985	0.008921	0.019097	-92.9026	0.002524	0.00987	cpx	Na0.01Ca0.22Fe''1.05Mg0.65Fe'''0.05Ti0.00Al0.10Si1.93O6	48.5165	0.0709521	2.19914	1.51128	0	31.5021	11.0199	5.09202	0.0880058	0	0
2000	984	0.008852	0.018936	-92.0554	0.002503	0.009787	cpx	Na0.01Ca0.22Fe''1.05Mg0.65Fe'''0.05Ti0.00Al0.10Si1.93O6	48.4785	0.0710599	2.19644	1.51869	0	31.645	10.9255	5.07697	0.0878714	0	0
2000	983	0.008784	0.018775	-91.2088	0.002482	0.009704	cpx	Na0.01Ca0.22Fe''1.06Mg0.64Fe'''0.05Ti0.00Al0.10Si1.93O6	48.4404	0.0711655	2.1937	1.52611	0	31.7879	10.8309	5.06203	0.0877359	0	0
2000	982	0.008715	0.018613	-90.3623	0.002461	0.00962	cpx	Na0.01Ca0.22Fe''1.06Mg0.64Fe'''0.05Ti0.00Al0.10Si1.93O6	48.4024	0.071269	2.19091	1.53355	0	31.9308	10.7363	5.0472	0.0875992	0	0
2000	981	0.008646	0.018452	-89.5157	0.00244	0.009537	cpx	Na0.01Ca0.21Fe''1.07Mg0.63Fe'''0.05Ti0.00Al0.10Si1.93O6	48.3643	0.0713703	2.18808	1.541	0	32.0738	10.6415	5.03248	0.0874615	0	0
2000	980	0.008577	0.01829	-88.6689	0.002419	0.009453	cpx	Na0.01Ca0.21Fe''1.07Mg0.63Fe'''0.05Ti0.00Al0.10Si1.93O6	48.3262	0.0714692	2.18519	1.54846	0	32.2168	10.5467	5.01787	0.0873227	0	0
2000	979	0.008508	0.018128	-87.8215	0.002398	0.009369	cpx	Na0.01Ca0.21Fe''1.08Mg0.62Fe'''0.05Ti0.00Al0.10Si1.93O6	48.2882	0.0715657	2.18226	1.55593	0	32.3597	10.4518	5.00338	0.0871829	0	0
2000	978	0.008438	0.017966	-86.9733	0.002377	0.009285	cpx	Na0.01Ca0.21Fe''1.09Mg0.62Fe'''0.05Ti0.00Al0.10Si1.93O6	48.2501	0.0716596	2.17927	1.56341	0	32.5026	10.3569	4.989	0.087042	0	0
2000	977	0.008368	0.017803	-86.124	0.002356	0.009201	cpx	Na0.01Ca0.21Fe''1.09Mg0.61Fe'''0.05Ti0.00Al0.10Si1.93O6	48.2121	0.0717509	2.17624	1.5709	0	32.6455	10.2619	4.97474	0.0869001	0	0
2000	976	0.008298	0.01764	-85.2732	0.002335	0.009116	cpx	Na0.01Ca0.21Fe''1.10Mg0.61Fe'''0.05Ti0.00Al0.10Si1.93O6	48.1741	0.0718396	2.17315	1.57839	0	32.7882	10.1669	4.9606	0.0867572	0	0
2000	975	0.008227	0.017476	-84.4204	0.002313	0.009031	cpx	Na0.01Ca0.21Fe''1.10Mg0.60Fe'''0.05Ti0.00Al0.10Si1.93O6	48.1362	0.0719254	2.17002	1.58588	0	32.9309	10.0719	4.94658	0.0866133	0	0
2000	974	0.008156	0.017311	-83.5653	0.002292	0.008946	cpx	Na0.01Ca0.21Fe''1.11Mg0.60Fe'''0.05Ti0.00Al0.10Si1.93O6	48.0983	0.0720084	2.16682	1.59337	0	33.0735	9.97689	4.93268	0.0864684	0	0
2000	973	0.008084	0.017145	-82.7073	0.00227	0.00886	cpx	Na0.01Ca0.21Fe''1.11Mg0.59Fe'''0.05Ti0.00Al0.10Si1.93O6	48.0604	0.0720883	2.16358	1.60085	0	33.216	9.8819	4.9189	0.0863226	0	0
2000	972	0.008012	0.016978	-81.8456	0.002248	0.008774	cpx	Na0.01Ca0.21Fe''1.12Mg0.59Fe'''0.05Ti0.00Al0.10Si1.93O6	48.0226	0.0721651	2.16028	1.60833	0	33.3583	9.78694	4.90524	0.0861759	0	0
2000	971	0.007939	0.01681	-80.9793	0.002226	0.008687	cpx	Na0.01Ca0.21Fe''1.12Mg0.58Fe'''0.05Ti0.00Al0.10Si1.93O6	47.9849	0.0722386	2.15692	1.6158	0	33.5004	9.69203	4.89171	0.0860283	0	0
2000	970	0.007865	0.016641	-80.1073	0.002204	0.0086	cpx	Na0.01Ca0.21Fe''1.13Mg0.57Fe'''0.05Ti0.00Al0.10Si1.93O6	47.9472	0.0723088	2.15351	1.62325	0	33.6424	9.59719	4.8783	0.0858798	0	0
2000	969	0.00779	0.01647	-79.2281	0.002182	0.008511	cpx	Na0.01Ca0.21Fe''1.14Mg0.57Fe'''0.05Ti0.00Al0.10Si1.93O6	47.9096	0.0723754	2.15004	1.6307	0	33.7841	9.50243	4.86502	0.0857304	0	0
2000	968	0.007715	0.016297	-78.3397	0.002159	0.008422	cpx	Na0.01Ca0.21Fe''1.14Mg0.56Fe'''0.05Ti0.00Al0.10Si1.93O6	47.8721	0.0724383	2.14652	1.63812	0	33.9256	9.40776	4.85187	0.0855802	0	0
2000	967	0.007637	0.016121	-77.4395	0.002136	0.008331	cpx	Na0.01Ca0.21Fe''1.15Mg0.56Fe'''0.05Ti0.00Al0.10Si1.93O6	47.8347	0.0724973	2.14293	1.64552	0	34.0669	9.31322	4.83885	0.0854291	0	0
2000	966	0.007558	0.015941	-76.5238	0.002113	0.008238	cpx	Na0.01Ca0.21Fe''1.15Mg0.55Fe'''0.05Ti0.00Al0.10Si1.93O6	47.7974	0.0725521	2.13928	1.65289	0	34.2078	9.21881	4.82596	0.0852772	0	0
2000	965	0.007477	0.015757	-75.5873	0.002089	0.008143	cpx	Na0.01Ca0.21Fe''1.16Mg0.55Fe'''0.05Ti0.00Al0.10Si1.93O6	47.7602	0.0726025	2.13558	1.66024	0	34.3485	9.12457	4.8132	0.0851246	0	0
2000	964	0.007393	0.015567	-74.6223	0.002064	0.008045	cpx	Na0.01Ca0.21Fe''1.16Mg0.54Fe'''0.05Ti0.00Al0.10Si1.93O6	47.7232	0.0726481	2.13181	1.66754	0	34.4888	9.03052	4.80058	0.0849711	0	0
2000	963	0.007304	0.015367	-73.6173	0.002038	0.007942	cpx	Na0.01Ca0.21Fe''1.17Mg0.54Fe'''0.05Ti0.00Al0.10Si1.93O6	47.6863	0.0726883	2.12797	1.67481	0	34.6286	8.93669	4.78809	0.0848169	0	0
2000	962	0.007209	0.015156	-72.5536	0.00201	0.007833	cpx	Na0.01Ca0.21Fe''1.17Mg0.53Fe'''0.05Ti0.00Al0.10Si1.92O6	47.6496	0.0727225	2.12407	1.68202	0	34.7681	8.84314	4.77574	0.084662	0	0
2000	961	0.007105	0.014925	-71.4001	0.00198	0.007713	cpx	Na0.01Ca0.21Fe''1.18Mg0.53Fe'''0.05Ti0.00Al0.10Si1.92O6	47.6131	0.0727497	2.1201	1.68917	0	34.907	8.74993	4.76353	0.0845063	0	0
2000	960	0.006986	0.014663	-70.1005	0.001946	0.007578	cpx	Na0.01Ca0.21Fe''1.19Mg0.52Fe'''0.05Ti0.00Al0.10Si1.92O6	47.5768	0.0727682	2.11605	1.69623	0	35.0452	8.65714	4.75147	0.0843499	0	0
2000	959	0.006841	0.014347	-68.5421	0.001904	0.007415	cpx	Na0.01Ca0.21Fe''1.19Mg0.52Fe'''0.05Ti0.00Al0.10Si1.92O6	47.5409	0.0727752	2.11191	1.70318	0	35.1826	8.56494	4.73957	0.0841928	0	0
2000	958	0.006643	0.013922	-66.4685	0.001848	0.007195	cpx	Na0.01Ca0.21Fe''1.20Mg0.51Fe'''0.05Ti0.00Al0.10Si1.92O6	47.5054	0.0727651	2.10765	1.70995	0	35.3187	8.47362	4.72785	0.0840349	0	0
2000	957	0.008969	0.01878	-89.5916	0.002493	0.009706	cpx	Na0.01Ca0.20Fe''1.20Mg0.51Fe'''0.05Ti0.00Al0.10Si1.92O6	47.4634	0.0730033	2.1044	1.71933	0	35.4714	8.36925	4.71534	0.083879	0	0
2000	956	0.007858	0.016439	-78.3664	0.002183	0.008496	cpx	Na0.01Ca0.20Fe''1.21Mg0.50Fe'''0.05Ti0.00Al0.10Si1.92O6	47.4243	0.0731304	2.10062	1.72754	0	35.6165	8.27078	4.70336	0.0837212	0	0
2000	955	0.000256	0.000535	-2.55053	7.1e-05	0.000277	cpx	Na0.01Ca0.20Fe''1.21Mg0.50Fe'''0.05Ti0.00Al0.10Si1.92O6	47.4069	0.0724476	2.09348	1.72725	0	35.7072	8.21475	4.69442	0.0835559	0	0
feldspar_0	thermodynamic	data	and	composition:
Pressure	Temperature	mass	S	H	V	Cp	formula	SiO2	TiO2	Al2O3	Fe2O3	Cr2O3	FeO	MgO	CaO	Na2O	K2O	H2O	An
2000	1229	0.958975	2.36823	-13140.4	0.358861	1.18493	K0.00Na0.22Ca0.78Al1.78Si2.22O8	48.5322	0	33.0507	0	0	0	0	15.9429	2.46322	0.010943	0	78
2000	1228	1.35595	3.34791	-18581	0.507469	1.67533	K0.00Na0.22Ca0.78Al1.78Si2.22O8	48.5759	0	33.0213	0	0	0	0	15.9084	2.48323	0.0112274	0	78
2000	1227	1.29415	3.19468	-17735.1	0.48439	1.59887	K0.00Na0.22Ca0.78Al1.78Si2.22O8	48.6189	0	32.9923	0	0	0	0	15.8744	2.50296	0.0115122	0	78
2000	1226	1.23651	3.05179	-16946.3	0.462866	1.52756	K0.00Na0.22Ca0.78Al1.78Si2.22O8	48.6613	0	32.9636	0	0	0	0	15.8409	2.52241	0.0117974	0	78
2000	1225	1.18268	2.91833	-16209.6	0.442761	1.46096	K0.00Na0.23Ca0.77Al1.77Si2.23O8	48.7031	0	32.9354	0	0	0	0	15.8078	2.54159	0.0120828	0	77
2000	1224	1.13232	2.7935	-15520.3	0.423951	1.39866	K0.00Na0.23Ca0.77Al1.77Si2.23O8	48.7444	0	32.9075	0	0	0	0	15.7752	2.56051	0.0123686	0	77
2000	1223	1.08514	2.67655	-14874.6	0.406327	1.3403	K0.00Na0.23Ca0.77Al1.77Si2.23O8	48.7851	0	32.88	0	0	0	0	15.743	2.57917	0.0126547	0	77
2000	1222	1.04088	2.56684	-14268.7	0.389792	1.28554	K0.00Na0.23Ca0.77Al1.77Si2.23O8	48.8253	0	32.8529	0	0	0	0	15.7113	2.59759	0.012941	0	77
2000	1221	0.9993	2.46378	-13699.6	0.374256	1.23411	K0.00Na0.23Ca0.77Al1.77Si2.23O8	48.8649	0	32.8261	0	0	0	0	15.6799	2.61577	0.0132275	0	77
2000	1220	0.960188	2.36684	-13164.2	0.359642	1.18572	K0.00Na0.23Ca0.77Al1.77Si2.23O8	48.9041	0	32.7997	0	0	0	0	15.649	2.63372	0.0135143	0	77
2000	1219	0.923351	2.27555	-12660	0.345877	1.14016	K0.00Na0.23Ca0.76Al1.76Si2.24O8	48.9428	0	32.7736	0	0	0	0	15.6184	2.65145	0.0138014	0	76
2000	1218	0.888617	2.18947	-12184.5	0.332896	1.09719	K0.00Na0.24Ca0.76Al1.76Si2.24O8	48.981	0	32.7478	0	0	0	0	15.5882	2.66896	0.0140886	0	76
2000	1217	0.855826	2.10822	-11735.7	0.320641	1.05663	K0.00Na0.24Ca0.76Al1.76Si2.24O8	49.0187	0	32.7223	0	0	0	0	15.5584	2.68625	0.014376	0	76
2000	1216	0.824838	2.03143	-11311.5	0.309058	1.0183	K0.00Na0.24Ca0.76Al1.76Si2.24O8	49.0561	0	32.6971	0	0	0	0	15.5289	2.70334	0.0146636	0	76
2000	1215	0.79552	1.95879	-10910.1	0.2981	0.98204	K0.00Na0.24Ca0.76Al1.76Si2.24O8	49.0929	0	32.6722	0	0	0	0	15.4997	2.72023	0.0149514	0	76
2000	1214	0.767756	1.89	-10530	0.28772	0.9477	K0.00Na0.24Ca0.76Al1.76Si2.24O8	49.1294	0	32.6475	0	0	0	0	15.4709	2.73693	0.0152393	0
2000	1213	0.741436	1.8248	-10169.7	0.27788	0.915147	K0.00Na0.24Ca0.76Al1.76Si2.24O8	49.1654	0	32.6232	0	0	0	0	15.4424	2.75344	0.0155274	0
2000	1212	0.716462	1.76293	-9827.79	0.268543	0.884259	K0.00Na0.25Ca0.75Al1.75Si2.25O8	49.2011	0	32.5991	0	0	0	0	15.4142	2.76976	0.0158156	0
2000	1211	0.692742	1.70417	-9503.05	0.259674	0.854925	K0.00Na0.25Ca0.75Al1.75Si2.25O8	49.2363	0	32.5753	0	0	0	0	15.3863	2.7859	0.0161039	0
2000	1210	0.670195	1.64833	-9194.35	0.251242	0.82704	K0.00Na0.25Ca0.75Al1.75Si2.25O8	49.2712	0	32.5518	0	0	0	0	15.3588	2.80187	0.0163923	0
2000	1209	0.665943	1.63764	-9136.42	0.249692	0.82175	K0.00Na0.25Ca0.75Al1.75Si2.25O8	49.3372	0	32.5073	0	0	0	0	15.3067	2.83216	0.0167487	0
2000	1208	0.632255	1.55452	-8674.71	0.237093	0.780134	K0.00Na0.25Ca0.75Al1.75Si2.25O8	49.3901	0	32.4715	0	0	0	0	15.2649	2.85644	0.0170776	0
2000	1207	0.608664	1.49625	-8351.49	0.228277	0.75098	K0.00Na0.25Ca0.74Al1.74Si2.26O8	49.4426	0	32.4361	0	0	0	0	15.2233	2.88056	0.0174063	0
2000	1206	0.586453	1.44139	-8047.17	0.219976	0.723532	K0.00Na0.26Ca0.74Al1.74Si2.26O8	49.4948	0	32.4009	0	0	0	0	15.1821	2.90451	0.017735	0
2000	1205	0.565533	1.38972	-7760.53	0.212157	0.69768	K0.00Na0.26Ca0.74Al1.74Si2.26O8	49.5467	0	32.3658	0	0	0	0	15.1411	2.9283	0.0180636	0
2000	1204	0.545768	1.34091	-7489.71	0.204769	0.673255	K0.00Na0.26Ca0.74Al1.74Si2.26O8	49.5982	0	32.3311	0	0	0	0	15.1004	2.95195	0.0183922	0
2000	1203	0.527073	1.29474	-7233.55	0.19778	0.650153	K0.00Na0.26Ca0.74Al1.74Si2.26O8	49.6494	0	32.2965	0	0	0	0	15.0599	2.97545	0.0187208	0
2000	1202	0.509371	1.25102	-6990.99	0.191162	0.628279	K0.00Na0.27Ca0.73Al1.73Si2.27O8	49.7004	0	32.2621	0	0	0	0	15.0197	2.99881	0.0190495	0
2000	1201	0.492592	1.20958	-6761.09	0.184889	0.607546	K0.00Na0.27Ca0.73Al1.73Si2.27O8	49.751	0	32.2279	0	0	0	0	14.9797	3.02204	0.0193782	0
2000	1200	0.476673	1.17027	-6542.95	0.178937	0.587876	K0.00Na0.27Ca0.73Al1.73Si2.27O8	49.8013	0	32.194	0	0	0	0	14.9399	3.04513	0.019707	0
2000	1199	0.461556	1.13294	-6335.8	0.173284	0.569196	K0.00Na0.27Ca0.73Al1.73Si2.27O8	49.8514	0	32.1602	0	0	0	0	14.9003	3.0681	0.0200359	0
2000	1198	0.447186	1.09746	-6138.89	0.16791	0.551441	K0.00Na0.27Ca0.73Al1.73Si2.27O8	49.9012	0	32.1265	0	0	0	0	14.861	3.09094	0.020365	0
2000	1197	0.438922	1.07697	-6025.78	0.164827	0.541217	K0.00Na0.28Ca0.72Al1.72Si2.28O8	49.9514	0	32.0926	0	0	0	0	14.8213	3.11399	0.0206979	0
2000	1196	0.434383	1.06563	-5963.8	0.163143	0.535587	K0.00Na0.28Ca0.72Al1.72Si2.28O8	50.0009	0	32.0593	0	0	0	0	14.7822	3.13666	0.0210337	0
[truncated: 2,665 more rows]
[truncated: 1 more columns]
